# Supplementary material for: Exploring the properties of new super-chalcogens based on multiple electron counting rules: a combined DFT and ab initio study on [M(B 2 C 4 X 6 ) 2 ] 2− dianion clusters
Source: Royal Society of Chemistry journal article supplement (doi:10.1039/d4cp03513e), 2024-12-03
Supplement: d4cp03513e1.pdf [file d4cp03513e1.pdf]

# Exploring the Properties of New Super-chalcogens Based on Multiple Electron Counting Rules: A Combined DFT and *Ab Initio* Study on $[M(B_2C_4X_6)_2]^{2-}$ Dianion Clusters

## Supporting Information

### Part I

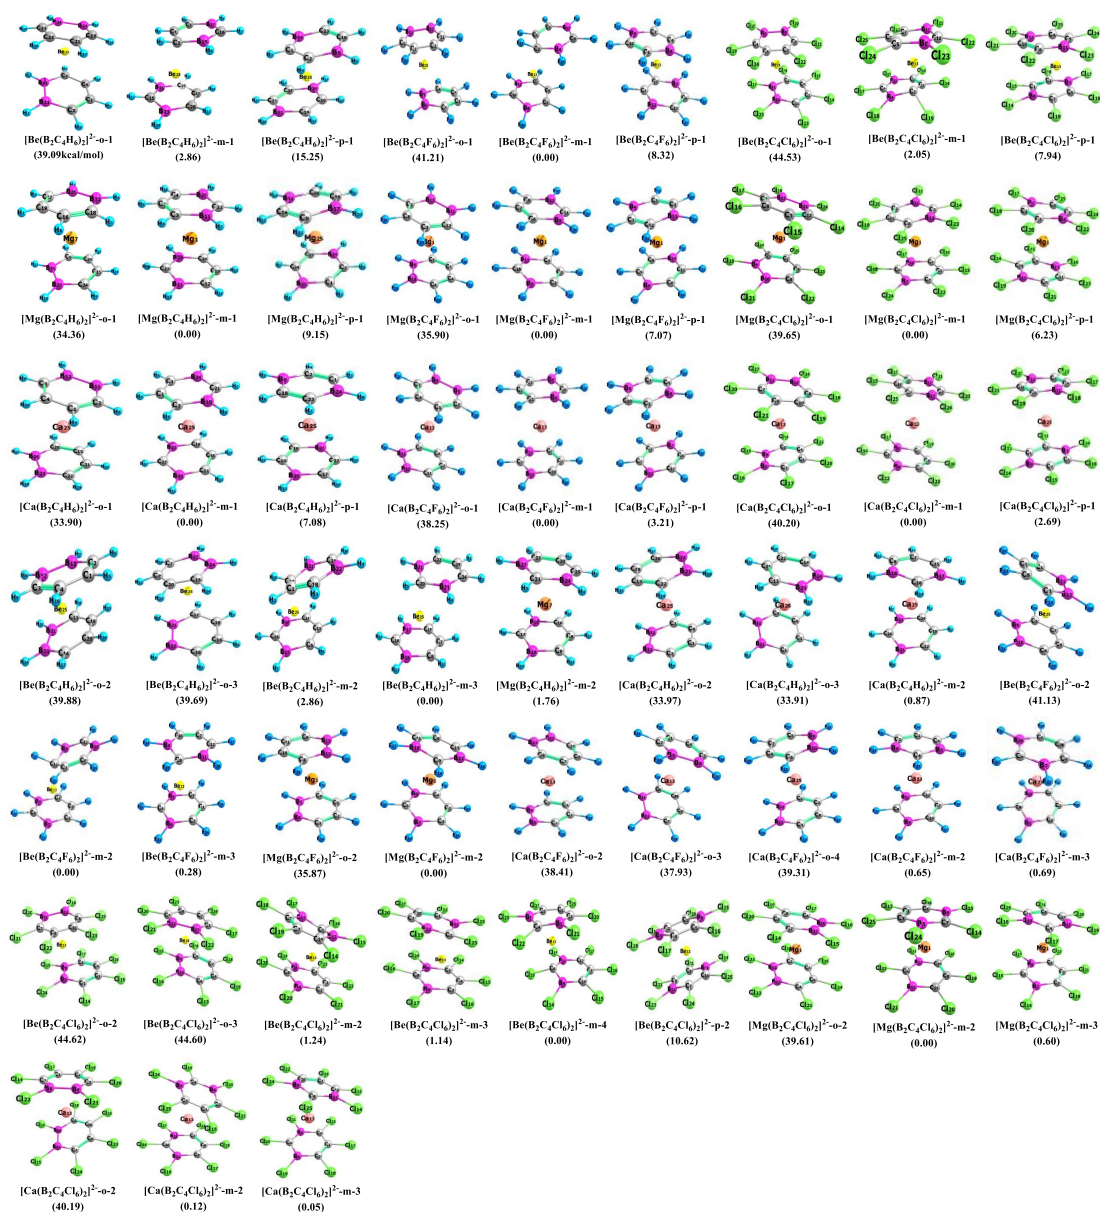

Figure S1. All 3D geometries and relative energies of dianion clusters  $[M(B_2C_4X_6)_2]^{2-}$  ( $M = Be, Mg, Ca; X = H, F, Cl$ ) at B3LYP-D3(BJ)/6-311++G(d,p) level.

Table S1. FVDE values (eV) for all  $[M(B_2C_4X_6)_2]^{2-}$  clusters as well as  $[B_2C_4X_6]^{2-}$ ,  $[MX_4]^{2-}$  clusters (M = Be, Mg and Ca; X = H, F and Cl) at the B3LYP-D3(BJ)/6-311++G(d,p) level.

| Clusters                     | FVDE  | Clusters                     | FVDE  | Clusters                     | FVDE  |
|------------------------------|-------|------------------------------|-------|------------------------------|-------|
| $[Be(B_2C_4H_6)_2]^{2-m-1}$  | -0.72 | $[Mg(B_2C_4H_6)_2]^{2-m-1}$  | -0.57 | $[Ca(B_2C_4H_6)_2]^{2-m-1}$  | -0.04 |
| $[Be(B_2C_4H_6)_2]^{2-m-2}$  | -0.71 | $[Mg(B_2C_4H_6)_2]^{2-m-2}$  | -0.57 | $[Ca(B_2C_4H_6)_2]^{2-m-2}$  | -0.03 |
| $[Be(B_2C_4H_6)_2]^{2-m-3}$  | -1.23 | $[Mg(B_2C_4H_6)_2]^{2-o-1}$  | -0.67 | $[Ca(B_2C_4H_6)_2]^{2-o-1}$  | -0.53 |
| $[Be(B_2C_4H_6)_2]^{2-o-1}$  | -1.32 | $[Mg(B_2C_4H_6)_2]^{2-p-1}$  | -0.63 | $[Ca(B_2C_4H_6)_2]^{2-o-2}$  | -0.59 |
| $[Be(B_2C_4H_6)_2]^{2-o-2}$  | -1.00 |                              |       | $[Ca(B_2C_4H_6)_2]^{2-o-3}$  | -0.53 |
| $[Be(B_2C_4H_6)_2]^{2-o-3}$  | -1.40 |                              |       | $[Ca(B_2C_4H_6)_2]^{2-p-1}$  | -0.63 |
| $[Be(B_2C_4H_6)_2]^{2-p-1}$  | -1.03 |                              |       |                              |       |
| $[Be(B_2C_4F_6)_2]^{2-m-1}$  | 0.71  | $[Mg(B_2C_4F_6)_2]^{2-m-1}$  | 0.76  | $[Ca(B_2C_4F_6)_2]^{2-m-1}$  | 1.04  |
| $[Be(B_2C_4F_6)_2]^{2-m-2}$  | 0.71  | $[Mg(B_2C_4F_6)_2]^{2-m-2}$  | 0.92  | $[Ca(B_2C_4F_6)_2]^{2-m-2}$  | 1.10  |
| $[Be(B_2C_4F_6)_2]^{2-m-3}$  | 0.09  | $[Mg(B_2C_4F_6)_2]^{2-o-1}$  | 0.58  | $[Ca(B_2C_4F_6)_2]^{2-m-3}$  | 1.06  |
| $[Be(B_2C_4F_6)_2]^{2-o-1}$  | 0.37  | $[Mg(B_2C_4F_6)_2]^{2-o-2}$  | 0.60  | $[Ca(B_2C_4F_6)_2]^{2-o-1}$  | 0.62  |
| $[Be(B_2C_4F_6)_2]^{2-o-2}$  | 0.34  | $[Mg(B_2C_4F_6)_2]^{2-p-1}$  | 0.42  | $[Ca(B_2C_4F_6)_2]^{2-o-2}$  | 0.65  |
| $[Be(B_2C_4F_6)_2]^{2-p-1}$  | 0.32  |                              |       | $[Ca(B_2C_4F_6)_2]^{2-o-3}$  | 0.48  |
|                              |       |                              |       | $[Ca(B_2C_4F_6)_2]^{2-o-4}$  | 0.63  |
|                              |       |                              |       | $[Ca(B_2C_4F_6)_2]^{2-p-1}$  | 0.50  |
| $[Be(B_2C_4Cl_6)_2]^{2-m-1}$ | 1.25  | $[Mg(B_2C_4Cl_6)_2]^{2-m-1}$ | 1.27  | $[Ca(B_2C_4Cl_6)_2]^{2-m-1}$ | 1.35  |
| $[Be(B_2C_4Cl_6)_2]^{2-m-2}$ | 1.02  | $[Mg(B_2C_4Cl_6)_2]^{2-m-2}$ | 1.34  | $[Ca(B_2C_4Cl_6)_2]^{2-m-2}$ | 1.64  |
| $[Be(B_2C_4Cl_6)_2]^{2-m-3}$ | 1.02  | $[Mg(B_2C_4Cl_6)_2]^{2-m-3}$ | 1.47  | $[Ca(B_2C_4Cl_6)_2]^{2-m-3}$ | 1.64  |
| $[Be(B_2C_4Cl_6)_2]^{2-m-4}$ | 0.74  | $[Mg(B_2C_4Cl_6)_2]^{2-o-1}$ | 1.19  | $[Ca(B_2C_4Cl_6)_2]^{2-o-1}$ | 1.28  |
| $[Be(B_2C_4Cl_6)_2]^{2-o-1}$ | 0.98  | $[Mg(B_2C_4Cl_6)_2]^{2-o-2}$ | 1.25  | $[Ca(B_2C_4Cl_6)_2]^{2-o-2}$ | 1.28  |
| $[Be(B_2C_4Cl_6)_2]^{2-o-2}$ | 1.02  | $[Mg(B_2C_4Cl_6)_2]^{2-p-1}$ | 0.76  | $[Ca(B_2C_4Cl_6)_2]^{2-p-1}$ | 1.14  |
| $[Be(B_2C_4Cl_6)_2]^{2-o-3}$ | 1.02  |                              |       |                              |       |
| $[Be(B_2C_4Cl_6)_2]^{2-p-1}$ | 0.90  |                              |       |                              |       |
| $[Be(B_2C_4Cl_6)_2]^{2-p-2}$ | 0.47  |                              |       |                              |       |
| $[BeCl_4]^{2-}$              | 0.86  | $[MgCl_4]^{2-}$              | 1.53  | $[CaCl_4]^{2-}$              | 1.89  |
| $[BeF_4]^{2-}$               | 0.50  | $[MgF_4]^{2-}$               | 1.28  | $[CaF_4]^{2-}$               | 1.56  |
| $[BeH_4]^{2-}$               | -2.00 | $[MgH_4]^{2-}$               | -1.08 | $[CaH_4]^{2-}$               | -0.89 |
| $[B_2C_4H_6]^{2-m}$          | -3.15 | $[B_2C_4F_6]^{2-m}$          | -2.07 | $[B_2C_4Cl_6]^{2-m}$         | -1.24 |
| $[B_2C_4H_6]^{2-o}$          | -3.28 | $[B_2C_4F_6]^{2-o}$          | -1.71 | $[B_2C_4Cl_6]^{2-o}$         | -1.04 |
| $[B_2C_4H_6]^{2-p}$          | -2.68 | $[B_2C_4F_6]^{2-p}$          | -2.36 | $[B_2C_4Cl_6]^{2-p}$         | -0.62 |

Table S2. FVDE values (eV) calculated from different methods for selected structures.

| Clusters                     | OVGF(PS)   | B3LYP-D3(BJ) | $\omega$ B97XD | MP2  | (HF+MP2)/2 | $\Delta^1$ | $\Delta^2$ | $\Delta^3$ |
|------------------------------|------------|--------------|----------------|------|------------|------------|------------|------------|
| $[Be(B_2C_4Cl_6)_2]^{2-m-1}$ | 1.12(0.89) | 1.25         | 1.36           | 1.69 | 0.92       | 0.13       | 0.24       | -0.20      |
| $[Be(B_2C_4Cl_6)_2]^{2-m-2}$ | 1.12(0.89) | 1.02         | 1.36           | 1.69 | 0.92       | -0.10      | 0.24       | -0.20      |
| $[Mg(B_2C_4Cl_6)_2]^{2-m-1}$ | 1.22(0.89) | 1.27         | 1.71           | 2.10 | 1.50       | 0.05       | 0.49       | 0.28       |
| $[Mg(B_2C_4Cl_6)_2]^{2-m-2}$ | 1.22(0.89) | 1.34         | 1.71           | 2.12 | 1.51       | 0.12       | 0.49       | 0.29       |
| $[Ca(B_2C_4Cl_6)_2]^{2-m-1}$ | 1.65(0.89) | 1.35         | 2.53           | 2.27 | 1.85       | -0.30      | 0.88       | 0.20       |
| $[Ca(B_2C_4Cl_6)_2]^{2-m-2}$ | 1.65(0.89) | 1.64         | 2.53           | 2.27 | 1.85       | -0.01      | 0.88       | 0.20       |

$\Delta^1$  refers to the difference between B3LYP-D3(BJ) and OVGF results.

$\Delta^2$  refers to the difference between  $\omega$ B97XD and OVGF results.

$\Delta^3$  refers to the difference between (HF+MP2)/2 and OVGF results.

Table S3. FVDE value of partial clusters  $[M(B_2C_4X_6)_2]^{2-}$  (M = Be, Mg and Ca; X = H, F and Cl) and the corresponding maximum difference among H, F and Cl substituents.

| Clusters                    | H     | F    | Cl   | Maximum $\Delta$ FVDE |
|-----------------------------|-------|------|------|-----------------------|
| $[Be(B_2C_4X_6)_2]^{2-m-1}$ | -0.72 | 0.71 | 1.25 | 1.97                  |
| $[Be(B_2C_4X_6)_2]^{2-o-1}$ | -1.32 | 0.04 | 0.67 | 1.99                  |
| $[Be(B_2C_4X_6)_2]^{2-p-1}$ | -1.03 | 0.32 | 0.90 | 1.93                  |
| $[Mg(B_2C_4X_6)_2]^{2-m-1}$ | -0.57 | 0.76 | 1.27 | 1.84                  |
| $[Mg(B_2C_4X_6)_2]^{2-o-1}$ | -0.67 | 0.58 | 1.19 | 1.86                  |
| $[Mg(B_2C_4X_6)_2]^{2-p-1}$ | -0.83 | 0.42 | 0.76 | 1.59                  |
| $[Ca(B_2C_4X_6)_2]^{2-m-1}$ | -0.04 | 1.04 | 1.35 | 1.39                  |
| $[Ca(B_2C_4X_6)_2]^{2-o-1}$ | -0.53 | 0.62 | 1.28 | 1.81                  |
| $[Ca(B_2C_4X_6)_2]^{2-p-1}$ | -0.63 | 0.50 | 1.14 | 1.77                  |

Table S4. FVDE value of partial clusters  $[M(B_2C_4X_6)_2]^{2-}$  (M = Be, Mg and Ca; X = H, F and Cl) and the corresponding maximum difference among Be, Mg and Ca central atoms.

| Clusters                    | Be    | Mg    | Ca    | Maximum $\Delta$ FVDE |
|-----------------------------|-------|-------|-------|-----------------------|
| $[M(B_2C_4H_6)_2]^{2-m-1}$  | -0.72 | -0.57 | -0.04 | 0.68                  |
| $[M(B_2C_4F_6)_2]^{2-m-1}$  | 0.71  | 0.76  | 1.04  | 0.33                  |
| $[M(B_2C_4Cl_6)_2]^{2-m-1}$ | 1.25  | 1.27  | 1.35  | 0.10                  |
| $[M(B_2C_4H_6)_2]^{2-o-1}$  | -1.32 | -0.67 | -0.53 | 0.79                  |
| $[M(B_2C_4F_6)_2]^{2-o-1}$  | 0.04  | 0.58  | 0.62  | 0.58                  |
| $[M(B_2C_4Cl_6)_2]^{2-o-1}$ | 0.67  | 1.19  | 1.28  | 0.61                  |
| $[M(B_2C_4H_6)_2]^{2-p-1}$  | -1.03 | -0.83 | -0.63 | 0.40                  |
| $[M(B_2C_4F_6)_2]^{2-p-1}$  | 0.32  | 0.42  | 0.50  | 0.18                  |
| $[M(B_2C_4Cl_6)_2]^{2-p-1}$ | 0.90  | 0.76  | 1.14  | 0.38                  |

Table S5. FVDE value of partial clusters  $[M(B_2C_4X_6)_2]^{2-}$  (M = Be, Mg and Ca; X = H, F and Cl) and the corresponding maximum difference among m, o and p positions.

| Clusters                  | m     | o     | p     | Maximum $\Delta$ FVDE |
|---------------------------|-------|-------|-------|-----------------------|
| $[Be(B_2C_4H_6)_2]^{2-}$  | -0.72 | -1.32 | -1.03 | 0.60                  |
| $[Be(B_2C_4F_6)_2]^{2-}$  | 0.71  | 0.04  | 0.32  | 0.67                  |
| $[Be(B_2C_4Cl_6)_2]^{2-}$ | 1.25  | 0.67  | 0.90  | 0.58                  |
| $[Mg(B_2C_4H_6)_2]^{2-}$  | -0.57 | -0.67 | -0.83 | 0.26                  |
| $[Mg(B_2C_4F_6)_2]^{2-}$  | 0.76  | 0.58  | 0.42  | 0.34                  |
| $[Mg(B_2C_4Cl_6)_2]^{2-}$ | 1.27  | 1.19  | 0.76  | 0.51                  |
| $[Ca(B_2C_4H_6)_2]^{2-}$  | -0.04 | -0.53 | -0.63 | 0.59                  |
| $[Ca(B_2C_4F_6)_2]^{2-}$  | 1.04  | 0.62  | 0.50  | 0.54                  |
| $[Ca(B_2C_4Cl_6)_2]^{2-}$ | 1.35  | 1.28  | 1.14  | 0.21                  |

Table S6. The electron affinity(eV) of substitute H, F, Cl and the ionization energy(eV) of Be, Mg, Ca

|    | H     | F    | Cl   | IE  | Be    | Mg    | Ca    |
|----|-------|------|------|-----|-------|-------|-------|
| EA | -0.35 | 1.25 | 2.48 | FIE | 8.04  | 6.60  | 5.12  |
|    |       |      |      | SIE | 18.12 | 14.72 | 11.31 |

FIE=First Ionization Energy,  $\Delta E_1 = E(X^+) - E(X^0)$

SIE=Second Ionization Energy,  $\Delta E_2 = E(X^{2+}) - E(X^+)$

Table S7. The kinetic energies of molecular orbitals for partial mono-anion and dianion structures.

|                              |        | anion (a.u.) |          | dianion (a.u.) | LUMO <sub>anion,Beta</sub> -HOMO <sub>dianion</sub> |      |
|------------------------------|--------|--------------|----------|----------------|-----------------------------------------------------|------|
|                              |        | Alpha        | Beta     |                | a.u.                                                | eV   |
| $[Be(B_2C_4H_6)_2]^{2-m-1}$  | LUMO+1 | 0.853068     | 0.112257 | 0.066969       | 0.031562                                            | 0.86 |
|                              | LUMO   | 0.118825     | 0.916096 | 0.060279       |                                                     |      |
|                              | HOMO   | 1.041259     | 0.981102 | 0.884534       |                                                     |      |
|                              | HOMO-1 | 0.98573      |          | 1.015431       |                                                     |      |
| $[Be(B_2C_4F_6)_2]^{2-m-1}$  | LUMO+1 | 1.10255      | 1.646936 | 0.357791       | 0.034726                                            | 0.94 |
|                              | LUMO   | 1.659678     | 1.625729 | 0.410067       |                                                     |      |
|                              | HOMO   | 1.705064     | 1.690984 | 1.591003       |                                                     |      |
|                              | HOMO-1 | 1.703791     |          | 1.78118        |                                                     |      |
| $[Be(B_2C_4Cl_6)_2]^{2-m-1}$ | LUMO+1 | 1.991046     | 1.720635 | 1.494181       | 0.030101                                            | 0.82 |
|                              | LUMO   | 1.661447     | 1.563239 | 1.436874       |                                                     |      |
|                              | HOMO   | 1.716185     | 1.678025 | 1.533138       |                                                     |      |
|                              | HOMO-1 | 1.770209     |          | 1.730486       |                                                     |      |
| $[Mg(B_2C_4H_6)_2]^{2-m-1}$  | LUMO+1 | 0.07578      | 0.103992 | 0.047765       | 0.004076                                            | 0.11 |
|                              | LUMO   | 0.106806     | 0.993017 | 0.04318        |                                                     |      |
|                              | HOMO   | 1.057945     | 0.897329 | 0.988941       |                                                     |      |
|                              | HOMO-1 | 1.018425     |          | 0.90006        |                                                     |      |
| $[Mg(B_2C_4F_6)_2]^{2-m-1}$  | LUMO+1 | 1.374667     | 1.115211 | 0.124725       | 0.008507                                            | 0.23 |
|                              | LUMO   | 1.130422     | 1.685461 | 0.431154       |                                                     |      |
|                              | HOMO   | 1.795147     | 1.648497 | 1.676954       |                                                     |      |
|                              | HOMO-1 | 1.795823     |          | 1.64076        |                                                     |      |
| $[Mg(B_2C_4Cl_6)_2]^{2-m-1}$ | LUMO+1 | 1.548158     | 1.787017 | 0.738806       | 0.001703                                            | 0.05 |
|                              | LUMO   | 1.810217     | 1.628693 | 0.931814       |                                                     |      |
|                              | HOMO   | 1.762346     | 1.635621 | 1.626990       |                                                     |      |
|                              | HOMO-1 | 1.803826     |          | 1.632241       |                                                     |      |

|                                                                                       |        |          |          |          |          |      |
|---------------------------------------------------------------------------------------|--------|----------|----------|----------|----------|------|
| [Ca(B <sub>2</sub> C <sub>4</sub> H <sub>6</sub> ) <sub>2</sub> ] <sup>2-</sup> -m-1  | LUMO+1 | 0.056605 | 0.030274 | 0.021253 | 0.00747  | 0.20 |
|                                                                                       | LUMO   | 0.030219 | 0.976600 | 0.020505 |          |      |
|                                                                                       | HOMO   | 0.942232 | 1.007931 | 0.969130 |          |      |
|                                                                                       | HOMO-1 | 0.949805 |          | 0.989624 |          |      |
| [Ca(B <sub>2</sub> C <sub>4</sub> F <sub>6</sub> ) <sub>2</sub> ] <sup>2-</sup> -m-1  | LUMO+1 | 1.638326 | 1.225157 | 0.023316 | 0.011988 | 0.37 |
|                                                                                       | LUMO   | 1.237057 | 1.729191 | 0.026279 |          |      |
|                                                                                       | HOMO   | 1.739507 | 1.688072 | 1.717203 |          |      |
|                                                                                       | HOMO-1 | 1.702604 |          | 1.667075 |          |      |
| [Ca(B <sub>2</sub> C <sub>4</sub> Cl <sub>6</sub> ) <sub>2</sub> ] <sup>2-</sup> -m-1 | LUMO+1 | 1.629114 | 1.57743  | 0.050573 | 0.006934 | 0.19 |
|                                                                                       | LUMO   | 1.55513  | 1.625812 | 0.048509 |          |      |
|                                                                                       | HOMO   | 1.686884 | 1.647126 | 1.618878 |          |      |
|                                                                                       | HOMO-1 | 1.721739 |          | 1.62481  |          |      |

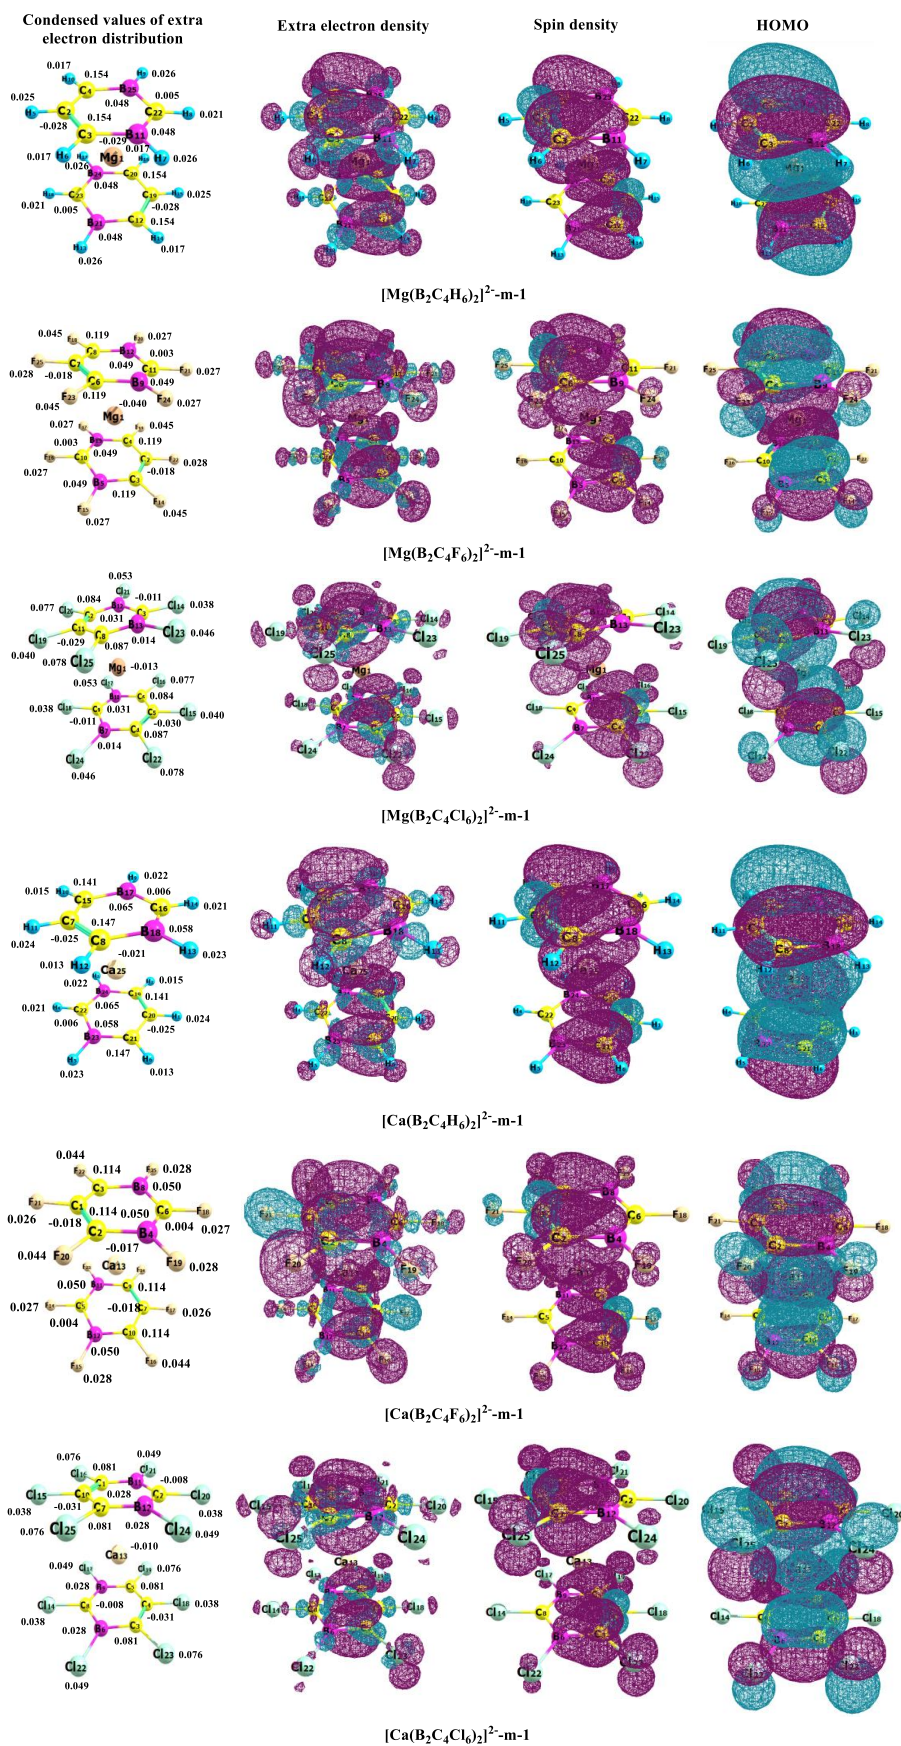

Figure S2. The distribution of extra electron, spin density and contribution of HOMO orbitals of  $[\text{Mg}(\text{B}_2\text{C}_4\text{X}_6)_2]^{2--m-1}$  ( $\text{X} = \text{H}, \text{F}, \text{Cl}$ ) and  $[\text{Ca}(\text{B}_2\text{C}_4\text{X}_6)_2]^{2--m-1}$  ( $\text{X} = \text{H}, \text{F}, \text{Cl}$ ) at the B3LYP-D3(BJ)/6-311++G(d,p) level.

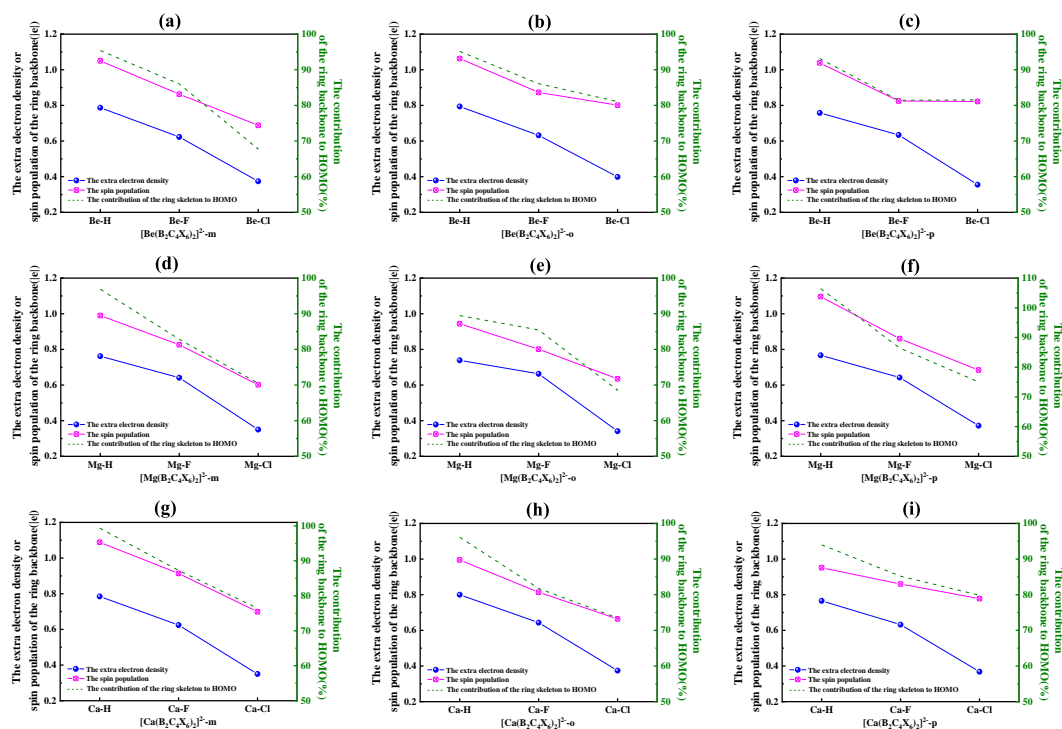

Figure S3. Comparison of extra electron density, spin density and contribution to HOMO for the ring backbone atoms of  $[M(B_2C_4X_6)_2]^{2-}$  ( $M = \text{Be, Mg and Ca; X = H, F and Cl}$ ) clusters: (a)  $[\text{Be}(B_2C_4X_6)_2]^{2-}$  ( $X = \text{H, F and Cl}$ )-m-1, (b)  $[\text{Be}(B_2C_4X_6)_2]^{2-}$  ( $X = \text{H, F and Cl}$ )-o-1, (c)  $[\text{Be}(B_2C_4X_6)_2]^{2-}$  ( $X = \text{H, F and Cl}$ )-p-1, (d)  $[\text{Mg}(B_2C_4X_6)_2]^{2-}$  ( $X = \text{H, F and Cl}$ )-m-1, (e)  $[\text{Mg}(B_2C_4X_6)_2]^{2-}$  ( $X = \text{H, F and Cl}$ )-o-1, (f)  $[\text{Mg}(B_2C_4X_6)_2]^{2-}$  ( $X = \text{H, F and Cl}$ )-p-1, (g)  $[\text{Ca}(B_2C_4X_6)_2]^{2-}$  ( $X = \text{H, F and Cl}$ )-m-1, (h)  $[\text{Ca}(B_2C_4X_6)_2]^{2-}$  ( $X = \text{H, F and Cl}$ )-o-1, (i)  $[\text{Ca}(B_2C_4X_6)_2]^{2-}$  ( $X = \text{H, F and Cl}$ )-p-1.

Table S8. First extra electron (FEE) of all C and B atoms on the aromatic ring backbone in  $[M(B_2C_4X_6)_2]^{2-}$ -m-1 ( $M = \text{Be, Mg and Ca; X = H, F and Cl}$ ) at the B3LYP-D3(BJ)/6-311++G(d,p) level.

| First extra electron (FEE)            |       |                                       |       |                                       |       |
|---------------------------------------|-------|---------------------------------------|-------|---------------------------------------|-------|
| Clusters                              | FEE   | Clusters                              | FEE   | Clusters                              | FEE   |
| $[\text{Be}(B_2C_4H_6)_2]^{2-}$ -o-1  | 0.794 | $[\text{Mg}(B_2C_4H_6)_2]^{2-}$ -o-1  | 0.739 | $[\text{Ca}(B_2C_4H_6)_2]^{2-}$ -o-1  | 0.800 |
| $[\text{Be}(B_2C_4F_6)_2]^{2-}$ -o-1  | 0.632 | $[\text{Mg}(B_2C_4F_6)_2]^{2-}$ -o-1  | 0.663 | $[\text{Ca}(B_2C_4F_6)_2]^{2-}$ -o-1  | 0.643 |
| $[\text{Be}(B_2C_4Cl_6)_2]^{2-}$ -o-1 | 0.399 | $[\text{Mg}(B_2C_4Cl_6)_2]^{2-}$ -o-1 | 0.341 | $[\text{Ca}(B_2C_4Cl_6)_2]^{2-}$ -o-1 | 0.374 |
| $[\text{Be}(B_2C_4H_6)_2]^{2-}$ -m-1  | 0.787 | $[\text{Mg}(B_2C_4H_6)_2]^{2-}$ -m-1  | 0.762 | $[\text{Ca}(B_2C_4H_6)_2]^{2-}$ -m-1  | 0.785 |
| $[\text{Be}(B_2C_4F_6)_2]^{2-}$ -m-1  | 0.623 | $[\text{Mg}(B_2C_4F_6)_2]^{2-}$ -m-1  | 0.641 | $[\text{Ca}(B_2C_4F_6)_2]^{2-}$ -m-1  | 0.624 |
| $[\text{Be}(B_2C_4Cl_6)_2]^{2-}$ -m-1 | 0.374 | $[\text{Mg}(B_2C_4Cl_6)_2]^{2-}$ -m-1 | 0.350 | $[\text{Ca}(B_2C_4Cl_6)_2]^{2-}$ -m-1 | 0.350 |
| $[\text{Be}(B_2C_4H_6)_2]^{2-}$ -p-1  | 0.758 | $[\text{Mg}(B_2C_4H_6)_2]^{2-}$ -p-1  | 0.767 | $[\text{Ca}(B_2C_4H_6)_2]^{2-}$ -p-1  | 0.766 |
| $[\text{Be}(B_2C_4F_6)_2]^{2-}$ -p-1  | 0.634 | $[\text{Mg}(B_2C_4F_6)_2]^{2-}$ -p-1  | 0.642 | $[\text{Ca}(B_2C_4F_6)_2]^{2-}$ -p-1  | 0.632 |
| $[\text{Be}(B_2C_4Cl_6)_2]^{2-}$ -p-1 | 0.355 | $[\text{Mg}(B_2C_4Cl_6)_2]^{2-}$ -p-1 | 0.372 | $[\text{Ca}(B_2C_4Cl_6)_2]^{2-}$ -p-1 | 0.368 |

Table S9. First extra electron (FEE) of all C and B atoms on the aromatic ring backbone and contribution of the aromatic ring backbone to the HOMO orbital and spin population of aromatic ring backbone in  $[M(B_2C_4X_6)_2]^{2-m-1}$  ( $M=Be, Mg$  and  $Ca$ ;  $X=H, F$  and  $Cl$ ) at the B3LYP-D3(BJ)/6-311++G(d,p) level.

| First extra electron (FEE)                                      |                 |                             |                 |                              |                 |
|-----------------------------------------------------------------|-----------------|-----------------------------|-----------------|------------------------------|-----------------|
| Clusters                                                        | FEE             | Clusters                    | FEE             | Clusters                     | FEE             |
| $[Be(B_2C_4H_6)_2]^{2-m-1}$                                     | 0.787           | $[Be(B_2C_4F_6)_2]^{2-m-1}$ | 0.623           | $[Be(B_2C_4Cl_6)_2]^{2-m-1}$ | 0.374           |
| $[Mg(B_2C_4H_6)_2]^{2-m-1}$                                     | 0.762           | $[Mg(B_2C_4F_6)_2]^{2-m-1}$ | 0.641           | $[Mg(B_2C_4Cl_6)_2]^{2-m-1}$ | 0.350           |
| $[Ca(B_2C_4H_6)_2]^{2-m-1}$                                     | 0.785           | $[Ca(B_2C_4F_6)_2]^{2-m-1}$ | 0.624           | $[Ca(B_2C_4Cl_6)_2]^{2-m-1}$ | 0.350           |
| Spin population number                                          |                 |                             |                 |                              |                 |
| Clusters                                                        | Spin population | Clusters                    | Spin population | Clusters                     | Spin population |
| $[Be(B_2C_4H_6)_2]^{2-m-1}$                                     | 1.050           | $[Be(B_2C_4F_6)_2]^{2-m-1}$ | 0.863           | $[Be(B_2C_4Cl_6)_2]^{2-m-1}$ | 0.688           |
| $[Mg(B_2C_4H_6)_2]^{2-m-1}$                                     | 0.990           | $[Mg(B_2C_4F_6)_2]^{2-m-1}$ | 0.826           | $[Mg(B_2C_4Cl_6)_2]^{2-m-1}$ | 0.601           |
| $[Ca(B_2C_4H_6)_2]^{2-m-1}$                                     | 1.089           | $[Ca(B_2C_4F_6)_2]^{2-m-1}$ | 0.914           | $[Ca(B_2C_4Cl_6)_2]^{2-m-1}$ | 0.699           |
| Contribution of the aromatic ring backbone to the HOMO orbitals |                 |                             |                 |                              |                 |
| Clusters                                                        | Contribution    | Clusters                    | Contribution    | Clusters                     | Contribution    |
| $[Be(B_2C_4H_6)_2]^{2-m-1}$                                     | 95.39           | $[Be(B_2C_4F_6)_2]^{2-m-1}$ | 86.04           | $[Be(B_2C_4Cl_6)_2]^{2-m-1}$ | 67.74           |
| $[Mg(B_2C_4H_6)_2]^{2-m-1}$                                     | 96.88           | $[Mg(B_2C_4F_6)_2]^{2-m-1}$ | 82.84           | $[Mg(B_2C_4Cl_6)_2]^{2-m-1}$ | 70.47           |
| $[Ca(B_2C_4H_6)_2]^{2-m-1}$                                     | 99.38           | $[Ca(B_2C_4F_6)_2]^{2-m-1}$ | 87.28           | $[Ca(B_2C_4Cl_6)_2]^{2-m-1}$ | 76.44           |

Table S10. First extra electron (FEE) of all C and B atoms on the aromatic ring backbone and contribution of the aromatic ring backbone to the HOMO orbital and spin population of aromatic ring backbone in  $[M(B_2C_4F_6)_2]^{2-m-1}$  ( $M=Be, Mg$  and  $Ca$ ) at the B3LYP-D3(BJ)/6-311++G(d,p) level.

| First extra electron (FEE)                                      |                 |                             |                 |                             |                 |
|-----------------------------------------------------------------|-----------------|-----------------------------|-----------------|-----------------------------|-----------------|
| Clusters                                                        | FEE             | Clusters                    | FEE             | Clusters                    | FEE             |
| $[Be(B_2C_4F_6)_2]^{2-m-1}$                                     | 0.623           | $[Mg(B_2C_4F_6)_2]^{2-m-1}$ | 0.641           | $[Ca(B_2C_4F_6)_2]^{2-m-1}$ | 0.624           |
| $[Be(B_2C_4F_6)_2]^{2-o-1}$                                     | 0.632           | $[Mg(B_2C_4F_6)_2]^{2-o-1}$ | 0.663           | $[Ca(B_2C_4F_6)_2]^{2-o-1}$ | 0.643           |
| $[Be(B_2C_4F_6)_2]^{2-p-1}$                                     | 0.634           | $[Mg(B_2C_4F_6)_2]^{2-p-1}$ | 0.642           | $[Ca(B_2C_4F_6)_2]^{2-p-1}$ | 0.632           |
| Spin population number                                          |                 |                             |                 |                             |                 |
| Clusters                                                        | Spin population | Clusters                    | Spin population | Clusters                    | Spin population |
| $[Be(B_2C_4F_6)_2]^{2-m-1}$                                     | 0.863           | $[Mg(B_2C_4F_6)_2]^{2-m-1}$ | 0.826           | $[Ca(B_2C_4F_6)_2]^{2-m-1}$ | 0.914           |
| $[Be(B_2C_4F_6)_2]^{2-o-1}$                                     | 0.873           | $[Mg(B_2C_4F_6)_2]^{2-o-1}$ | 0.801           | $[Ca(B_2C_4F_6)_2]^{2-o-1}$ | 0.814           |
| $[Be(B_2C_4F_6)_2]^{2-p-1}$                                     | 0.825           | $[Mg(B_2C_4F_6)_2]^{2-p-1}$ | 0.860           | $[Ca(B_2C_4F_6)_2]^{2-p-1}$ | 0.860           |
| Contribution of the aromatic ring backbone to the HOMO orbitals |                 |                             |                 |                             |                 |
| Clusters                                                        | Contribution    | Clusters                    | Contribution    | Clusters                    | Contribution    |
| $[Be(B_2C_4F_6)_2]^{2-m-1}$                                     | 86.04           | $[Mg(B_2C_4F_6)_2]^{2-m-1}$ | 82.84           | $[Ca(B_2C_4F_6)_2]^{2-m-1}$ | 87.28           |
| $[Be(B_2C_4F_6)_2]^{2-o-1}$                                     | 86.09           | $[Mg(B_2C_4F_6)_2]^{2-o-1}$ | 85.44           | $[Ca(B_2C_4F_6)_2]^{2-o-1}$ | 81.77           |
| $[Be(B_2C_4F_6)_2]^{2-p-1}$                                     | 81.43           | $[Mg(B_2C_4F_6)_2]^{2-p-1}$ | 86.46           | $[Ca(B_2C_4F_6)_2]^{2-p-1}$ | 85.20           |

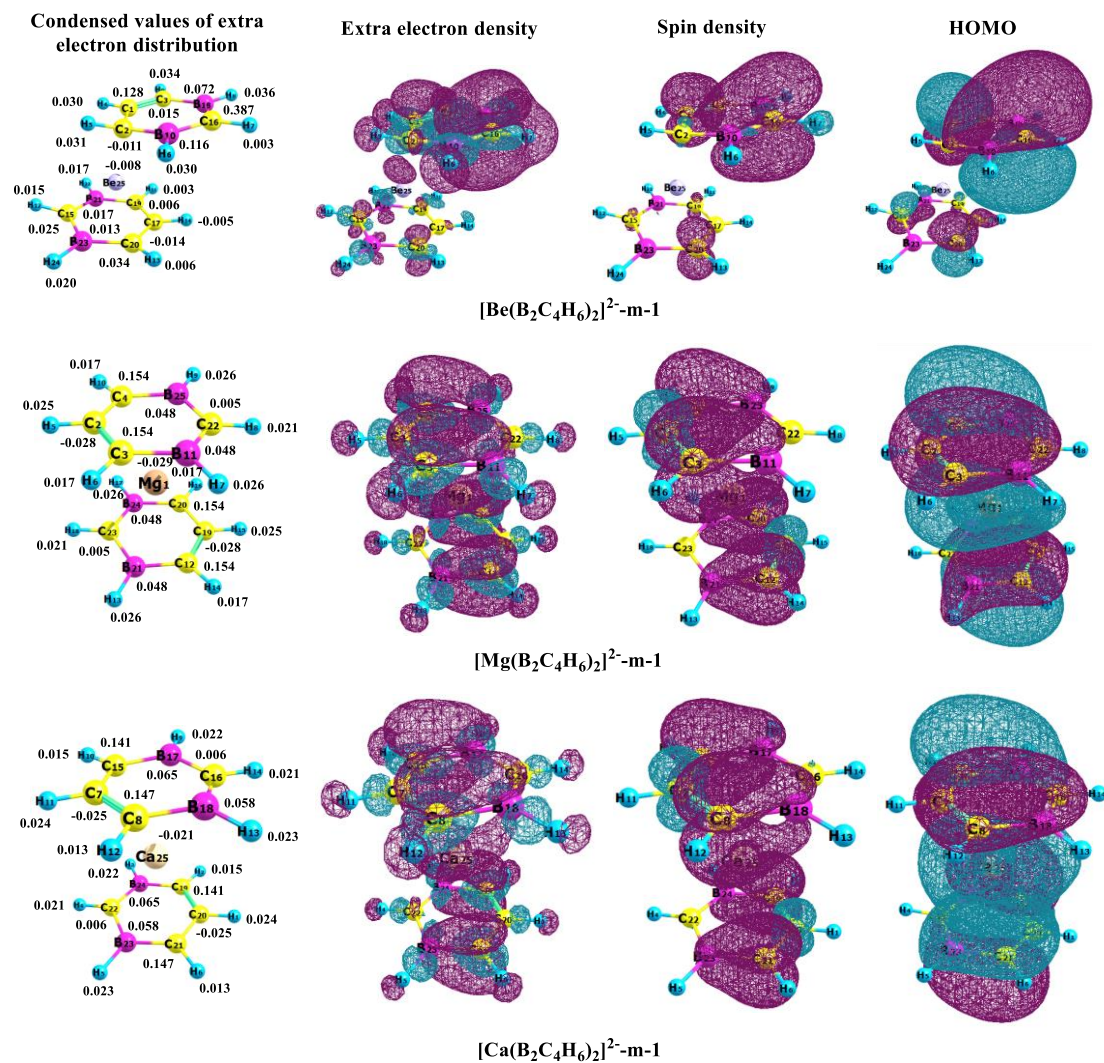

Figure S4. The distribution of the extra electron, the spin density and the contribution of HOMO orbitals of  $[\text{M}(\text{B}_2\text{C}_4\text{H}_6)_2]^{2-m-1}$  ( $\text{M} = \text{Be}, \text{Mg}, \text{Ca}$ ) at the B3LYP-D3(BJ)/6-311++G(d,p) level.



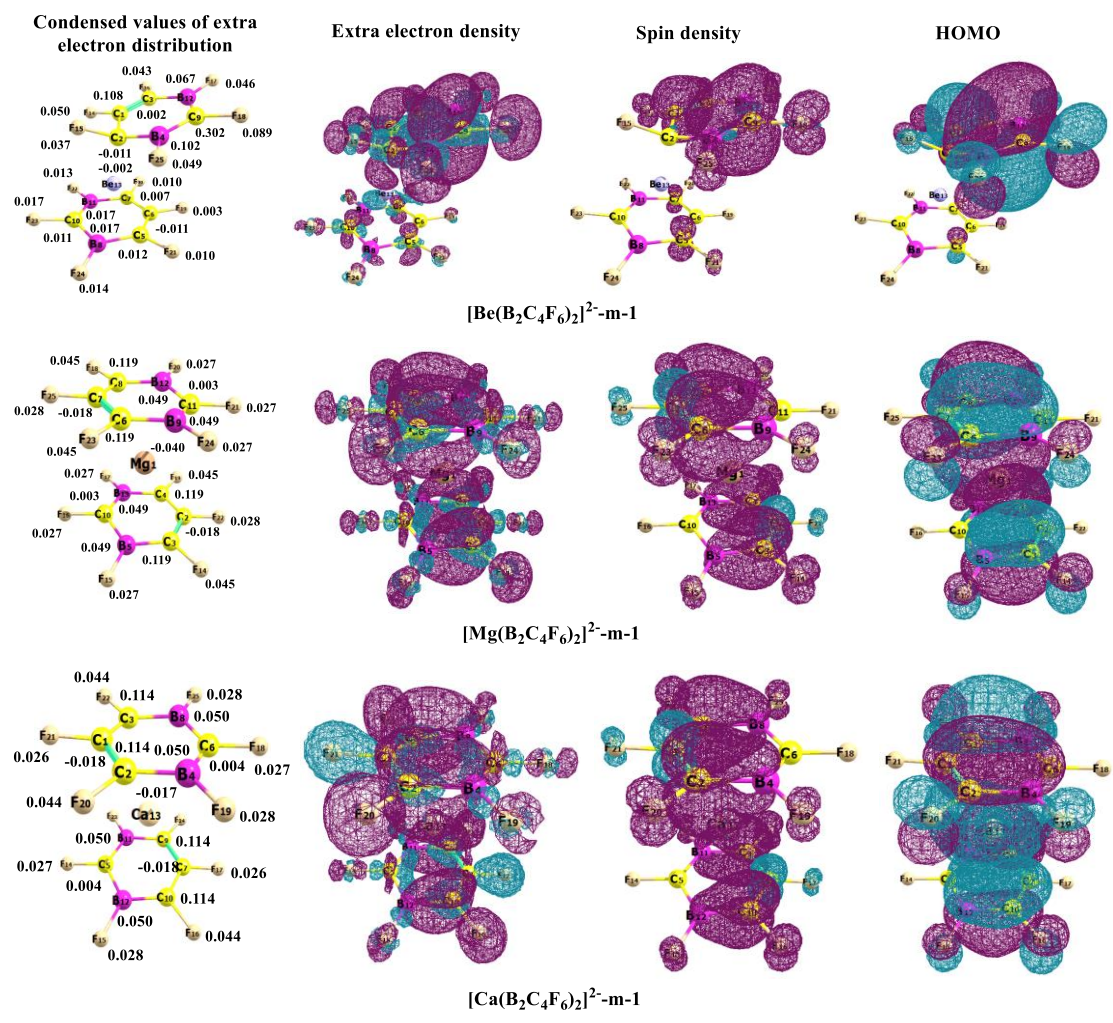

Figure S5. The distribution of the extra electron, the spin density and the contribution of HOMO orbitals of  $[\text{M}(\text{B}_2\text{C}_4\text{F}_6)_2]^{2-m-1}$  ( $\text{M} = \text{Be}, \text{Mg}, \text{Ca}$ ) at the B3LYP-D3(BJ)/6-311++G(d,p) level.

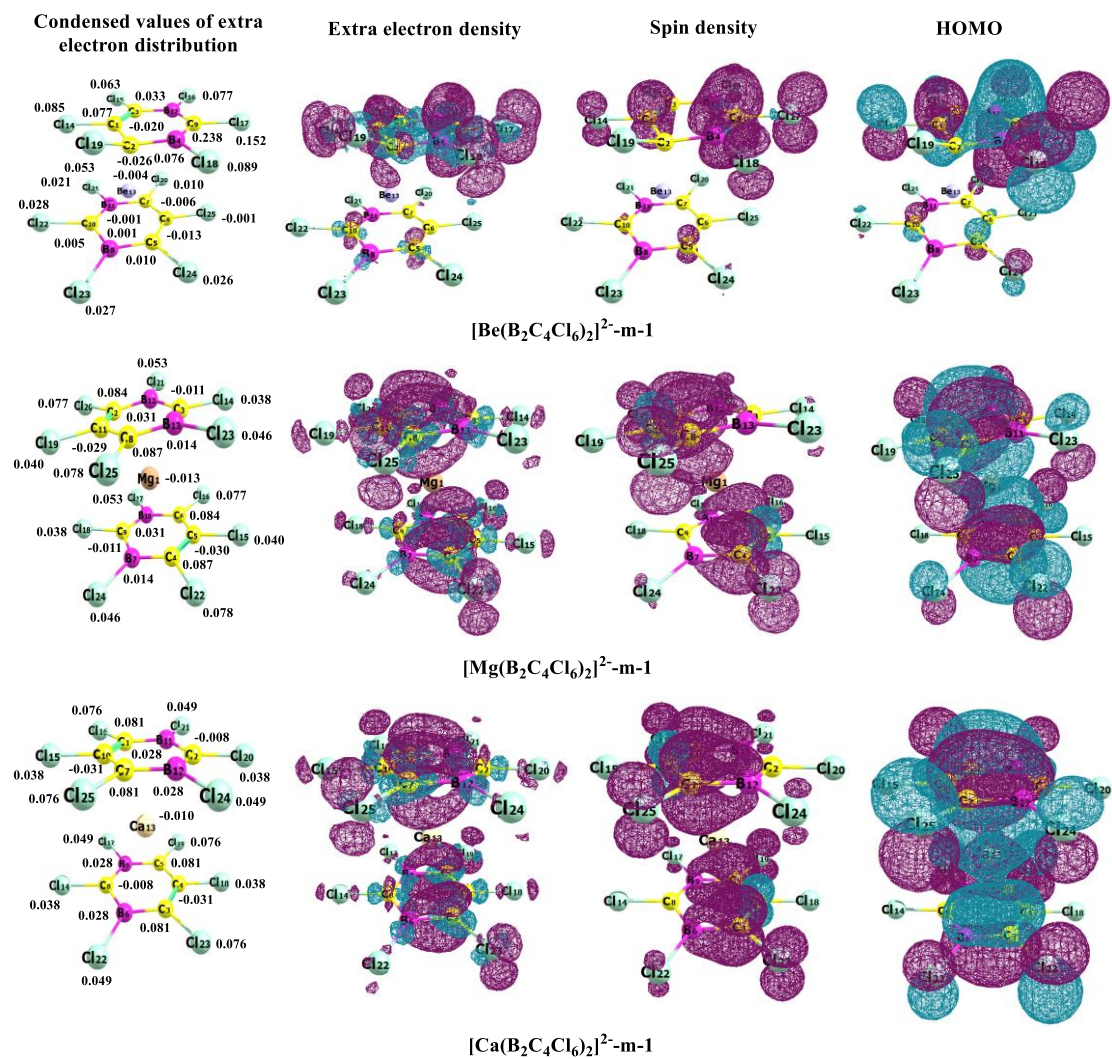

Figure S6. The distribution of the extra electron, the spin density and the contribution of HOMO orbitals of  $[\text{M}(\text{B}_2\text{C}_4\text{Cl}_6)_2]^{2-m-1}$  ( $\text{M} = \text{Be}, \text{Mg}, \text{Ca}$ ) at the B3LYP-D3(BJ)/6-311++G(d,p) level.

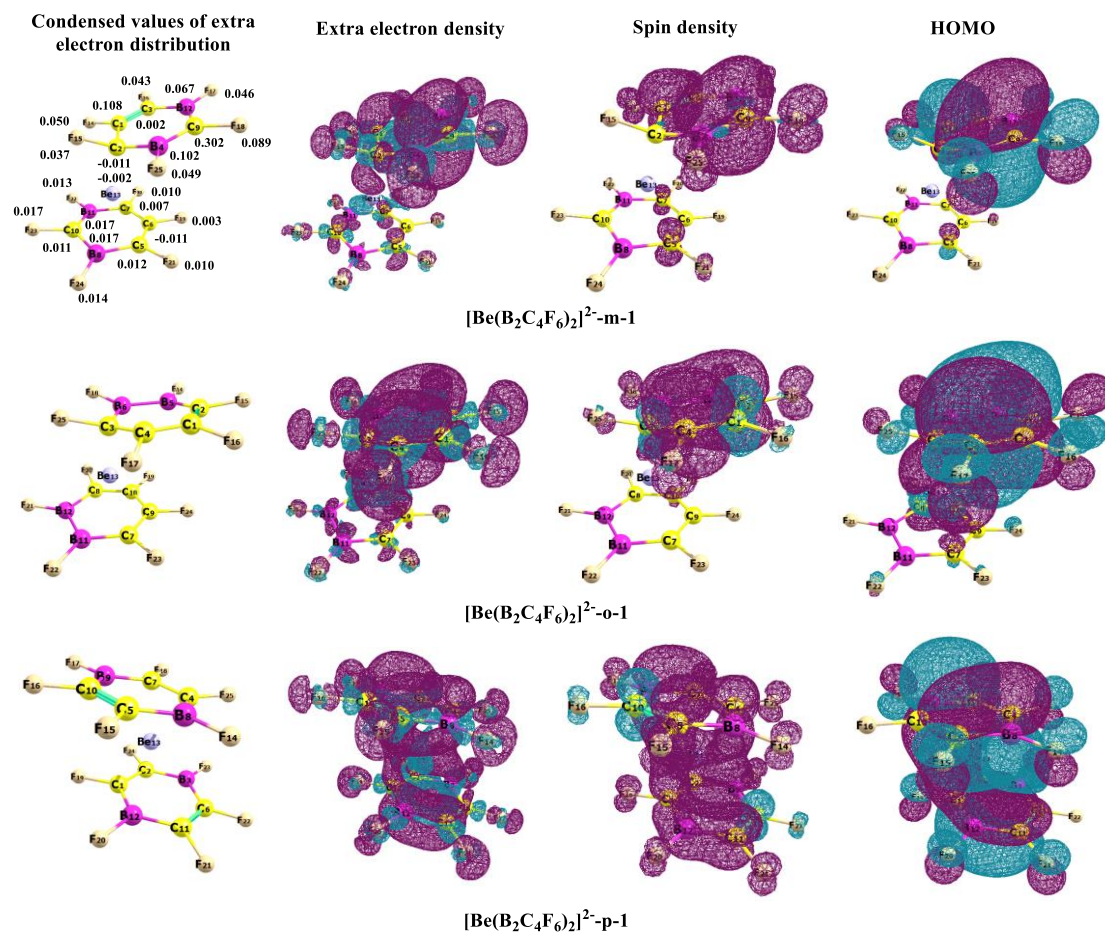

Figure S7. The distribution of the extra electron, the spin density and the contribution of HOMO orbitals of  $[\text{Be}(\text{B}_2\text{C}_4\text{F}_6)_2]^{2-}$  at the B3LYP-D3(BJ)/6-311++G(d,p) level.

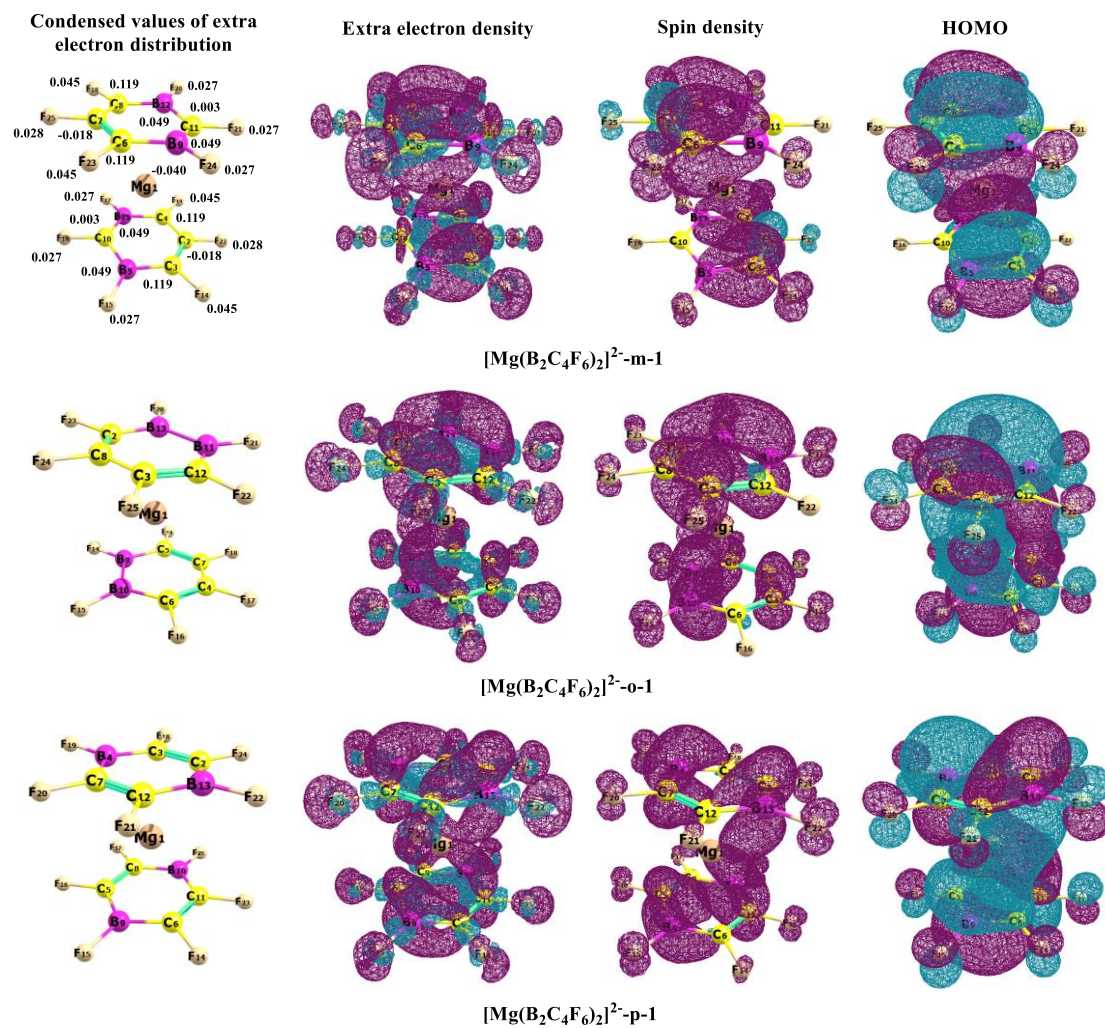

Figure S8. The distribution of the extra electron, the spin density and the contribution of HOMO orbitals of  $[\text{Mg}(\text{B}_2\text{C}_4\text{F}_6)_2]^{2-}$  at the B3LYP-D3(BJ)/6-311++G(d,p) level.

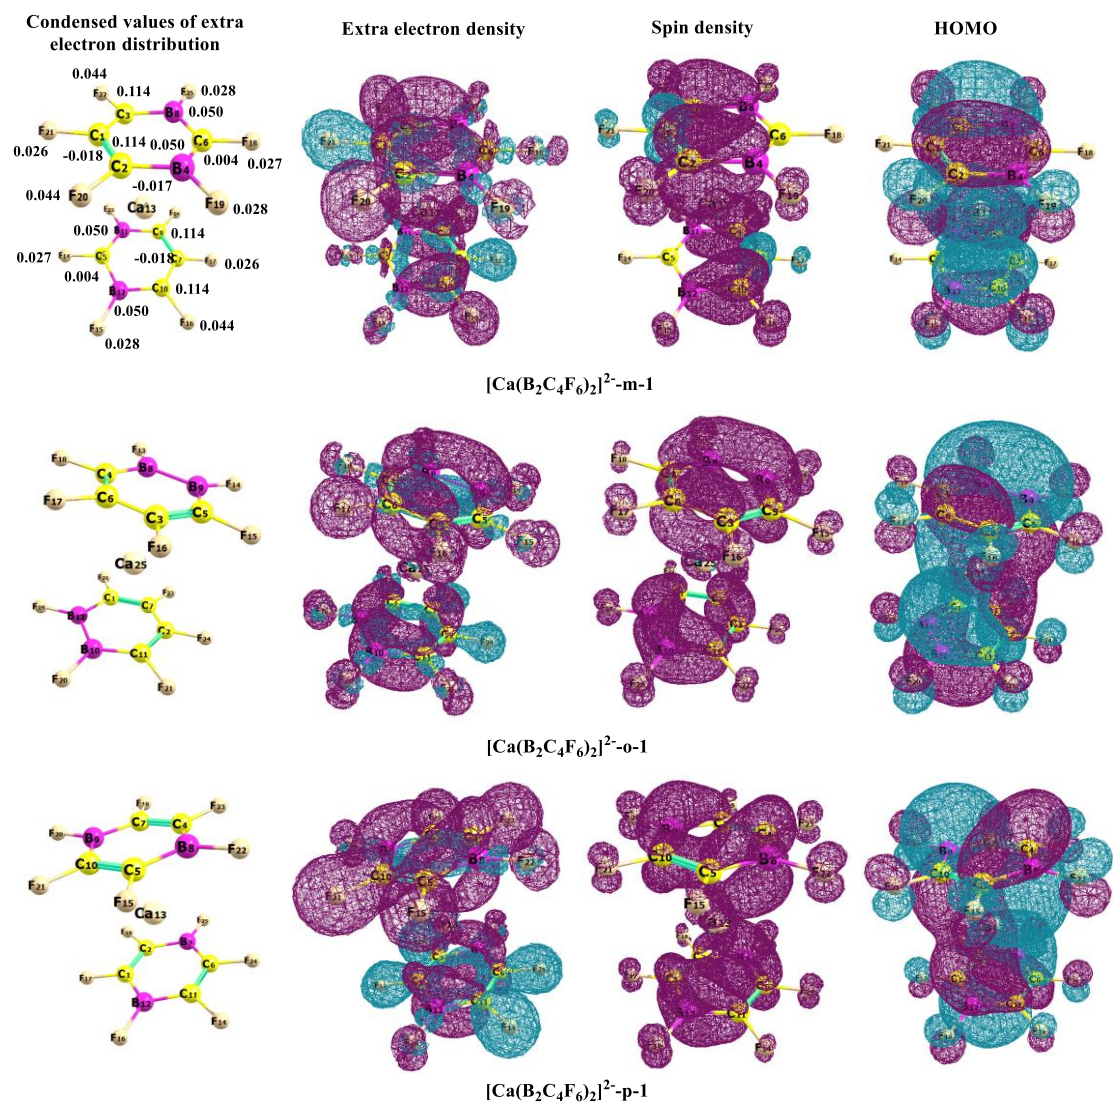

Figure S9. The distribution of the extra electron, the spin density and the contribution of HOMO orbitals of  $\text{Ca}(\text{B}_2\text{C}_4\text{F}_6)_2^{2-}$  at the B3LYP-D3(BJ)/6-311++G(d,p) level.

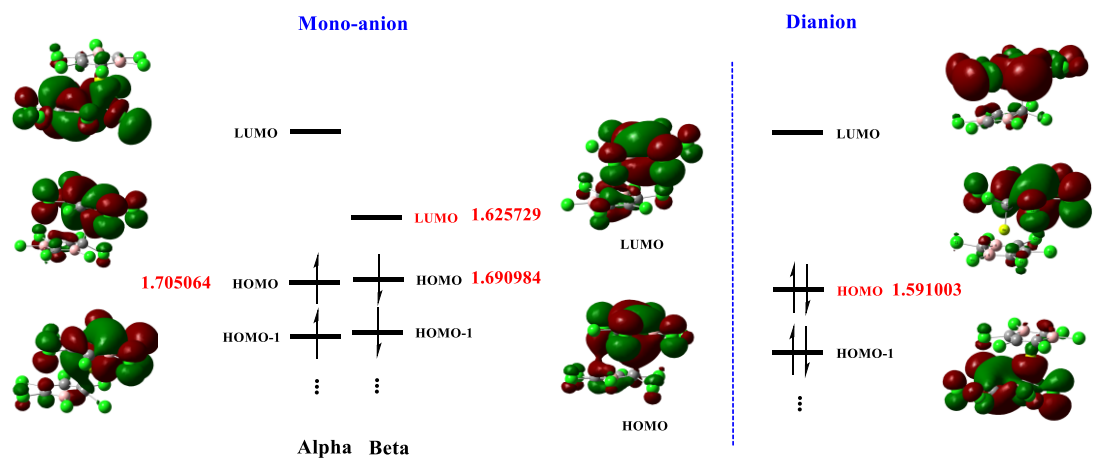

Figure S10. The kinetic energies (a.u.) of partial molecular orbitals for mono-anion  $[\text{Be}(\text{B}_2\text{C}_4\text{F}_6)_2]^{-m-1}$  and dianion  $[\text{Be}(\text{B}_2\text{C}_4\text{F}_6)_2]^{2-m-1}$ .

In addition, in order to estimate electronic kinetic energy of the extra electron, we have also analyzed kinetic energies of molecular orbitals for partial mono-anion and dianion structures as shown in Figure S9 and Table S5. Taking  $[\text{Be}(\text{B}_2\text{C}_4\text{Cl}_6)_2]^{2-}\text{-m-1}$  as an example (in Table S5), the kinetic energy of HOMO orbital on dianion is 1.533138 a.u., and that of HOMO alpha/beta orbital, LUMO beta orbital on mono-anion form is 1.716185/1.678025, 1.563239 a.u. Taking  $[\text{Be}(\text{B}_2\text{C}_4\text{F}_6)_2]^{2-}\text{-m-1}$  as an example, the kinetic energies of HOMO orbital on dianion and HOMO alpha/beta orbital, LUMO beta orbital on mono-anion are 1.591003 and 1.705064/1.690984, 1.625729 a.u. respectively. Taking  $[\text{Be}(\text{B}_2\text{C}_4\text{H}_6)_2]^{2-}\text{-m-1}$  as an example, the kinetic energies of HOMO orbital on dianion and HOMO alpha/beta orbital, LUMO beta orbital on mono-anion are 0.884534 and 1.041259/0.981102, 0.916096 a.u. respectively. Significantly, the kinetic energies of HOMO orbital on dianion indeed have been decreased in the process of getting extra electron from the mono-anion to the dianion as shown in Figure S9.

Here, the approximated approach was also employed to estimate the kinetic energies of extra electron, i.e., the decreased value of kinetic energies from LUMO beta orbital of mono-anion to HOMO orbital of dianion. For example, in  $[\text{Be}(\text{B}_2\text{C}_4\text{F}_6)_2]^{2-}\text{-m-1}$  and  $[\text{Be}(\text{B}_2\text{C}_4\text{Cl}_6)_2]^{2-}\text{-m-1}$ , the decreased values are 0.034726 a.u. (0.95 eV) and 0.030101 a.u. (0.82 eV) respectively. Significantly, the kinetic energies of extra electron have been also decreased. Moreover, from H to halogens, these values gradually increase overall, consistent with FVDE and FEE values. For example, in  $[\text{Be}(\text{B}_2\text{C}_4\text{H}_6)_2]^{2-}\text{-m-1}$  and  $[\text{Be}(\text{B}_2\text{C}_4\text{F}_6)_2]^{2-}\text{-m-1}$ , the decreased values are 0.031562 a.u.(0.86 eV) and 0.034726 a.u. (0.95 eV) respectively (in Table S5). Similar situations exist in  $[\text{Mg}(\text{B}_2\text{C}_4\text{X}_6)_2]^{2-}\text{-m-1}$  and  $[\text{Ca}(\text{B}_2\text{C}_4\text{X}_6)_2]^{2-}\text{-m-1}$  as shown in Table S5. It is noted that the clusters concluding Cl-substituent have close value of decreased kinetic energies with  $[\text{M}(\text{B}_2\text{C}_4\text{H}_6)_2]^{2-}\text{-m-1}$ . For example, the decreased value of kinetic energies in  $[\text{Be}(\text{B}_2\text{C}_4\text{Cl}_6)_2]^{2-}\text{-m-1}$  (0.030101 a.u. (0.82 eV)) is close to that of  $[\text{Be}(\text{B}_2\text{C}_4\text{H}_6)_2]^{2-}\text{-m-1}$  (0.031562 a.u.(0.86 eV)). This poor performance may be induced by other more complexed factor. Thus, in the future similar work, the comprehensive analysis methods will be employed to provide more reasonable explanation. In this revised manuscript, this idea of the approximated approach, i.e., the decreased value of kinetic energies from LUMO beta orbital on mono-anion form to HOMO orbital on dianion, to estimate the kinetic energies of extra electron.

Table S11. NICS(0) values (ppm) for  $[\text{M}(\text{B}_2\text{C}_4\text{X}_6)_2]^{2-}$  (M = Be, Mg, Ca; X = H, F, Cl) clusters at B3LYP-D3(BJ)/6-311++G (d,p) level.

| Be-H | ring 1 | ring 2 | Be-F | ring 1 | ring 2 | Be-Cl | ring 1 | ring 2 |
|------|--------|--------|------|--------|--------|-------|--------|--------|
| o-1  | -2.84  | -9.00  | o-1  | -12.75 | -20.70 | o-1   | -7.51  | -12.79 |
| o-2  | -2.84  | -9.00  | o-2  | --     | --     | o-2   | -7.51  | -12.79 |
| m-1  | -1.58  | -8.25  | m-1  | -9.04  | -20.25 | m-1   | -4.99  | -12.29 |
| m-2  | -1.58  | -8.25  | m-2  | -9.04  | -20.25 | m-2   | -4.99  | -12.29 |
| p-1  | -4.68  | -4.68  | p-1  | -16.17 | -16.17 | p-1   | -9.09  | -9.09  |
| Mg-H | ring 1 | ring 2 | Mg-F | ring 1 | ring 2 | Mg-Cl | ring 1 | ring 2 |
| o-1  | -4.90  | -4.90  | o-1  | --     | --     | o-1   | -9.99  | -9.99  |
| o-2  | --     | --     | o-2  | -17.32 | -17.32 | o-2   | --     | --     |
| m-1  | -3.66  | -3.66  | m-1  | -16.00 | -16.00 | m-1   | -8.87  | -8.87  |
| p-1  | -3.43  | -3.43  | p-1  | -15.99 | -15.99 | p-1   | -8.89  | -8.89  |
| Ca-H | ring 1 | ring 2 | Ca-F | ring 1 | ring 2 | Ca-Cl | ring 1 | ring 2 |
| o-1  | -5.80  | -5.80  | o-1  | -19.17 | -19.17 | o-1   | -11.52 | -11.52 |
| o-2  | -5.90  | -5.90  | o-2  | -19.12 | -19.12 | o-2   | -11.52 | -11.52 |
| m-1  | -5.35  | -5.35  | m-1  | -18.59 | -18.59 | m-1   | -11.04 | -11.06 |
| p-1  | -6.25  | -6.25  | p-1  | -19.71 | -19.71 | p-1   | -11.92 | -11.92 |

## Part II

Optimized coordinates and corresponding energies at B3LYP/6-311++G(d,p) level.  
[Be(B<sub>2</sub>C<sub>4</sub>H<sub>6</sub>)<sub>2</sub>]<sup>2-</sup>-m-1

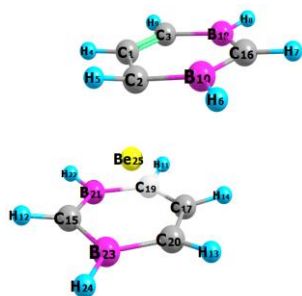

E (B3LYP/6-311++G(d,p)) = -426.44400127

|                                              |                             |
|----------------------------------------------|-----------------------------|
| Zero-point correction=                       | 0.182897 (Hartree/Particle) |
| Thermal correction to Energy=                | 0.194958                    |
| Thermal correction to Enthalpy=              | 0.195902                    |
| Thermal correction to Gibbs Free Energy=     | 0.144470                    |
| Sum of electronic and zero-point Energies=   | -426.261104                 |
| Sum of electronic and thermal Energies=      | -426.249043                 |
| Sum of electronic and thermal Enthalpies=    | -426.248099                 |
| Sum of electronic and thermal Free Energies= | -426.299532                 |

Charge = -2 Multiplicity = 1

|   |             |             |             |
|---|-------------|-------------|-------------|
| C | -1.45612700 | -1.30773700 | 0.75273100  |
| C | -0.79498700 | -0.11363400 | 1.27494500  |
| C | -2.46253100 | -1.26883400 | -0.17926300 |
| H | -1.08444200 | -2.27974900 | 1.09999700  |
| H | -0.33325900 | -0.26364600 | 2.26185700  |
| H | -0.93205300 | 2.26040200  | 1.47956400  |
| H | -2.91451000 | 2.32675900  | -0.40566400 |
| H | -3.94228500 | 0.04566000  | -1.52222900 |
| H | -2.82827900 | -2.23787100 | -0.53948200 |
| B | -1.40410600 | 1.27624200  | 0.92466200  |
| H | 0.48479100  | -1.04853100 | -2.18167800 |
| H | 2.96733600  | -1.34348500 | 1.52540900  |
| H | 1.62352700  | 2.53563100  | -0.25638900 |
| H | 0.46612800  | 1.33469500  | -1.97821100 |
| C | 2.59458100  | -0.76548000 | 0.67421900  |
| C | -2.49915600 | 1.35408000  | -0.10725200 |
| C | 1.16828300  | 0.78060900  | -1.35835800 |
| B | -3.04076000 | 0.07889900  | -0.68188900 |
| C | 1.18745500  | -0.62784900 | -1.46643400 |
| C | 1.85203000  | 1.47476000  | -0.33146600 |

|    |            |             |             |
|----|------------|-------------|-------------|
| B  | 1.96690800 | -1.50347700 | -0.48849200 |
| H  | 1.90002000 | -2.71074600 | -0.56271700 |
| B  | 2.66383200 | 0.74623600  | 0.73233400  |
| H  | 3.15922500 | 1.36286300  | 1.65224900  |
| Be | 0.74178800 | -0.03174200 | 0.35987100  |

[Be(B<sub>2</sub>C<sub>4</sub>H<sub>6</sub>)<sub>2</sub>]<sup>2-</sup>-m-2

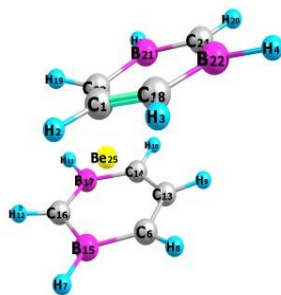

E (B3LYP/6-311++G(d,p)) = -426.44400128

|                                              |                             |
|----------------------------------------------|-----------------------------|
| Zero-point correction=                       | 0.182897 (Hartree/Particle) |
| Thermal correction to Energy=                | 0.194958                    |
| Thermal correction to Enthalpy=              | 0.195902                    |
| Thermal correction to Gibbs Free Energy=     | 0.144470                    |
| Sum of electronic and zero-point Energies=   | -426.261104                 |
| Sum of electronic and thermal Energies=      | -426.249043                 |
| Sum of electronic and thermal Enthalpies=    | -426.248099                 |
| Sum of electronic and thermal Free Energies= | -426.299531                 |

Charge = -2 Multiplicity = 1

|   |             |             |             |
|---|-------------|-------------|-------------|
| C | 1.45598900  | -1.30778300 | 0.75252400  |
| H | 1.08420100  | -2.27981700 | 1.09960200  |
| H | 2.82824800  | -2.23778400 | -0.53966300 |
| H | 3.94271600  | 0.04567000  | -1.52170800 |
| H | 0.93203100  | 2.26026300  | 1.47976500  |
| C | -1.18780100 | -0.62832900 | -1.46632800 |
| H | -1.90034300 | -2.71087900 | -0.56168300 |
| H | -0.48532900 | -1.04934400 | -2.18157100 |
| H | -0.46618100 | 1.33393600  | -1.97883100 |
| H | -1.62318500 | 2.53567100  | -0.25726800 |
| H | -3.15868300 | 1.36368700  | 1.65203100  |
| H | -2.96694300 | -1.34268100 | 1.52625700  |
| C | -1.16833900 | 0.78017200  | -1.35869100 |
| C | -1.85183900 | 1.47480600  | -0.33194300 |
| B | -1.96709000 | -1.50357500 | -0.48790300 |



|    |             |             |             |
|----|-------------|-------------|-------------|
| C  | -2.59437400 | -0.76504600 | 0.67473100  |
| B  | -2.66352300 | 0.74670900  | 0.73222900  |
| C  | 2.46247500  | -1.26877900 | -0.17937800 |
| H  | 0.33300800  | -0.26380300 | 2.26166300  |
| H  | 2.91438400  | 2.32688700  | -0.40556500 |
| B  | 1.40406500  | 1.27619100  | 0.92469800  |
| B  | 3.04089600  | 0.07898700  | -0.68169100 |
| C  | 0.79494900  | -0.11369300 | 1.27487800  |
| C  | 2.49910700  | 1.35415100  | -0.10721600 |
| Be | -0.74166600 | -0.03158900 | 0.35971200  |

[Be(B<sub>2</sub>C<sub>4</sub>H<sub>6</sub>)<sub>2</sub>]<sup>2-</sup>-m-3

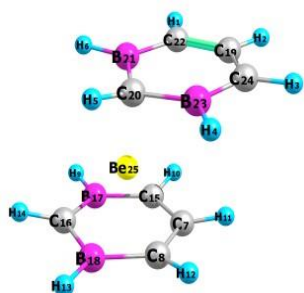

E (B3LYP/6-311++G(d,p)) = -426.44948309

|                                              |                             |
|----------------------------------------------|-----------------------------|
| Zero-point correction=                       | 0.183065 (Hartree/Particle) |
| Thermal correction to Energy=                | 0.195059                    |
| Thermal correction to Enthalpy=              | 0.196003                    |
| Thermal correction to Gibbs Free Energy=     | 0.145399                    |
| Sum of electronic and zero-point Energies=   | -426.266418                 |
| Sum of electronic and thermal Energies=      | -426.254424                 |
| Sum of electronic and thermal Enthalpies=    | -426.253480                 |
| Sum of electronic and thermal Free Energies= | -426.304084                 |

Charge = -2 Multiplicity = 1

|   |             |             |             |
|---|-------------|-------------|-------------|
| H | -2.87064600 | 2.13443300  | 0.61891700  |
| H | -3.58210100 | -0.00728300 | 1.44348800  |
| H | -2.81574200 | -2.13057300 | 0.61569200  |
| H | -0.98542400 | -2.37709100 | -1.40226300 |
| H | -0.16885400 | 0.03927700  | -2.38718800 |
| H | -1.04245100 | 2.43053900  | -1.39438900 |
| C | 1.09991700  | -0.83127800 | 1.31591600  |
| C | 1.85115700  | -1.45615100 | 0.29301800  |
| H | 1.77351500  | 2.71381900  | 0.73383300  |
| H | 0.32449700  | 0.93582600  | 2.19605200  |
| H | 0.39567600  | -1.43643000 | 1.88405500  |
| H | 1.66388400  | -2.52048600 | 0.16311700  |

|    |             |             |             |
|----|-------------|-------------|-------------|
| H  | 3.22412800  | -1.20929800 | -1.63288000 |
| H  | 2.94199400  | 1.48241800  | -1.38417600 |
| C  | 1.06703700  | 0.57063100  | 1.49132100  |
| C  | 2.55528600  | 0.85216100  | -0.57771700 |
| B  | 1.86511700  | 1.51548500  | 0.59489600  |
| B  | 2.67309200  | -0.65170800 | -0.70480800 |
| C  | -2.83200500 | 0.00361900  | 0.63682500  |
| C  | -0.74687800 | 0.03067000  | -1.45145200 |
| B  | -1.37343800 | 1.34415100  | -0.94601400 |
| C  | -2.41171700 | 1.25456800  | 0.15653300  |
| B  | -1.34390800 | -1.29873800 | -0.95101300 |
| C  | -2.37513400 | -1.23903900 | 0.15678000  |
| Be | 0.69780700  | 0.07195400  | -0.38672700 |

[Be(B<sub>2</sub>C<sub>4</sub>H<sub>6</sub>)<sub>2</sub>]<sup>2-</sup>-o-1

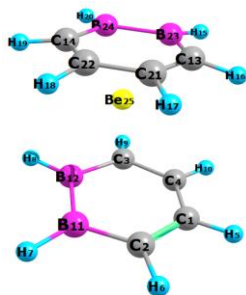

E (B3LYP/6-311++G(d,p)) = -426.38683558

|                                              |                             |
|----------------------------------------------|-----------------------------|
| Zero-point correction=                       | 0.183174 (Hartree/Particle) |
| Thermal correction to Energy=                | 0.195213                    |
| Thermal correction to Enthalpy=              | 0.196157                    |
| Thermal correction to Gibbs Free Energy=     | 0.145051                    |
| Sum of electronic and zero-point Energies=   | -426.203662                 |
| Sum of electronic and thermal Energies=      | -426.191623                 |
| Sum of electronic and thermal Enthalpies=    | -426.190678                 |
| Sum of electronic and thermal Free Energies= | -426.241785                 |

Charge = -2 Multiplicity = 1

|   |             |             |             |
|---|-------------|-------------|-------------|
| C | -2.43486800 | -1.08581400 | 0.20308200  |
| C | -2.84924800 | 0.19762200  | 0.67987900  |
| C | -0.80597000 | -0.16323900 | -1.43206200 |
| C | -1.49874300 | -1.27367300 | -0.79395500 |
| H | -2.86793900 | -1.98658200 | 0.65271100  |
| H | -3.60129900 | 0.16170000  | 1.48170900  |
| H | -2.72175800 | 2.54284300  | 0.57309000  |
| H | -0.60169400 | 2.15925200  | -1.73325400 |

|    |             |             |             |
|----|-------------|-------------|-------------|
| H  | -0.26791200 | -0.43969900 | -2.34952400 |
| H  | -1.23268300 | -2.29459000 | -1.07253600 |
| B  | -2.29999400 | 1.47801200  | 0.12226200  |
| B  | -1.17741000 | 1.28459400  | -1.10218900 |
| C  | 1.41800700  | -1.32368400 | 0.90571400  |
| C  | 2.19026200  | 1.30917000  | -0.06521700 |
| H  | 2.65559900  | -2.41862800 | -0.75115200 |
| H  | 0.89848100  | -2.22249700 | 1.24161200  |
| H  | 0.10228400  | -0.17470600 | 2.20905200  |
| H  | 0.75964200  | 1.99630200  | 1.42824900  |
| H  | 2.24296500  | 2.33593600  | -0.43219100 |
| H  | 3.47730500  | 0.41223100  | -1.80092100 |
| C  | 0.92883700  | -0.12930400 | 1.50727000  |
| C  | 1.30720000  | 1.14441800  | 1.04068700  |
| B  | 2.40508400  | -1.34089100 | -0.24461900 |
| B  | 2.83771300  | 0.15245200  | -0.79874100 |
| Be | 0.69929600  | 0.00115600  | -0.40069800 |

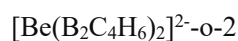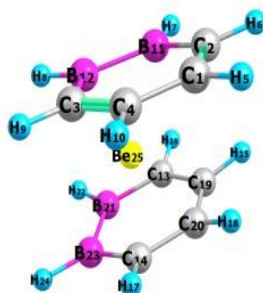

E (B3LYP/6-311++G(d,p)) = -426.38552848

|                                              |                             |
|----------------------------------------------|-----------------------------|
| Zero-point correction=                       | 0.183164 (Hartree/Particle) |
| Thermal correction to Energy=                | 0.195250                    |
| Thermal correction to Enthalpy=              | 0.196194                    |
| Thermal correction to Gibbs Free Energy=     | 0.144998                    |
| Sum of electronic and zero-point Energies=   | -426.202365                 |
| Sum of electronic and thermal Energies=      | -426.190278                 |
| Sum of electronic and thermal Enthalpies=    | -426.189334                 |
| Sum of electronic and thermal Free Energies= | -426.240531                 |

Charge = -2 Multiplicity = 1

|   |             |             |             |
|---|-------------|-------------|-------------|
| C | -2.61589200 | -0.50878600 | -0.64851200 |
| C | -1.95326800 | -1.44594100 | 0.14432800  |
| C | -1.76679700 | 1.43025300  | 0.61541400  |
| C | -2.51885700 | 0.88691300  | -0.42766700 |

|    |             |             |             |
|----|-------------|-------------|-------------|
| H  | -3.25495000 | -0.84251000 | -1.47363200 |
| H  | -2.16347800 | -2.49672500 | -0.10202000 |
| H  | -0.44916000 | -1.94734000 | 1.89066300  |
| H  | -0.31974200 | 1.15933900  | 2.45835600  |
| H  | -1.82354600 | 2.52307600  | 0.70809900  |
| H  | -3.07899800 | 1.54358700  | -1.10147300 |
| B  | -1.01587000 | -1.05021900 | 1.28508100  |
| B  | -0.92764500 | 0.58311500  | 1.57158400  |
| C  | 2.24193100  | -1.22734200 | 0.21431300  |
| C  | 1.34569000  | 1.24706200  | -1.02389800 |
| H  | 0.84095200  | -2.13451300 | -1.18743000 |
| H  | 2.33847600  | -2.20507000 | 0.69153600  |
| H  | 0.78148400  | 2.08105800  | -1.44410000 |
| H  | 0.08808500  | -0.08806100 | -2.19573900 |
| C  | 1.34767600  | -1.22059700 | -0.89530600 |
| C  | 0.91589000  | -0.02415800 | -1.49542600 |
| B  | 2.85154200  | 0.02563600  | 0.80429900  |
| H  | 3.51870100  | -0.09807600 | 1.81450100  |
| B  | 2.34555900  | 1.43060600  | 0.10102800  |
| H  | 2.56206300  | 2.56565300  | 0.47865100  |
| Be | 0.67848600  | 0.04237000  | 0.43828900  |

[Be(B<sub>2</sub>C<sub>4</sub>H<sub>6</sub>)<sub>2</sub>]<sup>2-</sup>-o-3

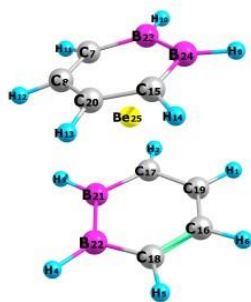

E (B3LYP/6-311++G(d,p)) = -426.38576463

|                                              |                             |
|----------------------------------------------|-----------------------------|
| Zero-point correction=                       | 0.183098 (Hartree/Particle) |
| Thermal correction to Energy=                | 0.195184                    |
| Thermal correction to Enthalpy=              | 0.196128                    |
| Thermal correction to Gibbs Free Energy=     | 0.144936                    |
| Sum of electronic and zero-point Energies=   | -426.202667                 |
| Sum of electronic and thermal Energies=      | -426.190581                 |
| Sum of electronic and thermal Enthalpies=    | -426.189636                 |
| Sum of electronic and thermal Free Energies= | -426.240829                 |

Charge = -2 Multiplicity = 1

|    |             |             |             |
|----|-------------|-------------|-------------|
| H  | 1.27561600  | -2.30180600 | 1.08905800  |
| H  | 0.26106500  | -0.45968100 | 2.33616900  |
| H  | 0.55689700  | 2.14301000  | 1.71628000  |
| H  | 2.65627700  | 2.54739400  | -0.61213400 |
| H  | 3.58357000  | 0.17731000  | -1.49659300 |
| H  | 2.90106800  | -1.97883100 | -0.64618400 |
| C  | -2.53154300 | 0.63306700  | 0.66583300  |
| C  | -1.84229200 | 1.38585900  | -0.32818900 |
| H  | -1.61393700 | -2.79773100 | -0.72309100 |
| H  | -3.15949900 | -1.40912000 | 1.61561000  |
| H  | -2.88035200 | 1.23761800  | 1.50766900  |
| H  | -1.70042500 | 2.45411700  | -0.19627100 |
| H  | -0.45619600 | 1.38183700  | -1.95660000 |
| H  | -0.30674000 | -1.00085100 | -2.19549300 |
| C  | -1.05774700 | -0.65668600 | -1.48417800 |
| C  | 2.45690500  | -1.08350500 | -0.19799100 |
| C  | 0.82061800  | -0.17589700 | 1.43498900  |
| C  | 2.83841400  | 0.20339400  | -0.68813100 |
| C  | 1.52939500  | -1.27982500 | 0.80578400  |
| C  | -1.11632600 | 0.76157400  | -1.36048800 |
| B  | 1.15309000  | 1.27626100  | 1.08969400  |
| B  | 2.26374500  | 1.47952500  | -0.14190300 |
| B  | -2.63322400 | -0.87695000 | 0.65539200  |
| B  | -1.81339800 | -1.60863000 | -0.57711300 |
| Be | -0.63823900 | -0.01804700 | 0.33636500  |

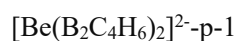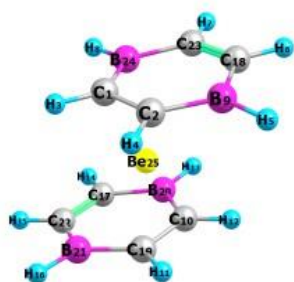

E (B3LYP/6-311++G(d,p)) = -426.42419437

|                                            |                             |
|--------------------------------------------|-----------------------------|
| Zero-point correction=                     | 0.182496 (Hartree/Particle) |
| Thermal correction to Energy=              | 0.194802                    |
| Thermal correction to Enthalpy=            | 0.195746                    |
| Thermal correction to Gibbs Free Energy=   | 0.144408                    |
| Sum of electronic and zero-point Energies= | -426.241698                 |
| Sum of electronic and thermal Energies=    | -426.229393                 |

Sum of electronic and thermal Enthalpies= -426.228449

Sum of electronic and thermal Free Energies= -426.279786

Charge = -2 Multiplicity = 1

|    |             |             |             |
|----|-------------|-------------|-------------|
| C  | 0.96932300  | -0.28360200 | 1.54383700  |
| C  | 1.49314700  | -1.37473000 | 0.72900400  |
| H  | 0.33875800  | -0.55104500 | 2.39320900  |
| H  | 1.18415600  | -2.38619900 | 1.00511300  |
| H  | 2.73695200  | -2.01361400 | -1.19226500 |
| H  | 3.38634500  | 0.61273600  | -1.59426500 |
| H  | 2.52277300  | 2.41304000  | -0.26693600 |
| H  | 0.81628200  | 2.07184400  | 1.83189300  |
| B  | 2.36235300  | -1.11097700 | -0.46595500 |
| C  | -0.96942400 | -0.28281300 | -1.54403500 |
| H  | -1.18316700 | -2.38552200 | -1.00659400 |
| H  | -0.33844200 | -0.54983900 | -2.39321400 |
| H  | -0.81742400 | 2.07317300  | -1.83099500 |
| H  | -2.52372900 | 2.41230700  | 0.26820700  |
| H  | -3.38586700 | 0.61117100  | 1.59494300  |
| H  | -2.73544400 | -2.01483500 | 1.19142200  |
| C  | -2.24698300 | 1.39106500  | -0.02371700 |
| C  | 2.74237000  | 0.35060200  | -0.74321200 |
| C  | -1.49267500 | -1.37438300 | -0.72991400 |
| B  | -1.28752100 | 1.15282500  | -1.20119200 |
| B  | -2.36152700 | -1.11163100 | 0.46547000  |
| C  | -2.74215000 | 0.34968300  | 0.74355500  |
| C  | 2.24641300  | 1.39150000  | 0.02435500  |
| B  | 1.28692500  | 1.15215900  | 1.20151000  |
| Be | -0.00061700 | -0.42725700 | 0.00026900  |

[Be(B<sub>2</sub>C<sub>4</sub>F<sub>6</sub>)<sub>2</sub>]<sup>2-</sup>-m-1

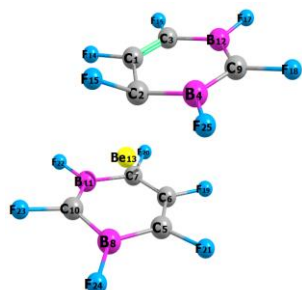

E (B3LYP/6-311++G(d,p)) = -1617.97818967

Zero-point correction=

0.096406 (Hartree/Particle)

Thermal correction to Energy=

0.119939

|                                              |              |
|----------------------------------------------|--------------|
| Thermal correction to Enthalpy=              | 0.120883     |
| Thermal correction to Gibbs Free Energy=     | 0.041432     |
| Sum of electronic and zero-point Energies=   | -1617.881784 |
| Sum of electronic and thermal Energies=      | -1617.858250 |
| Sum of electronic and thermal Enthalpies=    | -1617.857306 |
| Sum of electronic and thermal Free Energies= | -1617.936757 |

Charge = -2 Multiplicity = 1

|    |             |             |             |
|----|-------------|-------------|-------------|
| C  | -1.28714200 | 1.26424600  | -0.98161000 |
| C  | -0.54091600 | 0.03168800  | -1.24437400 |
| C  | -2.45273900 | 1.29271700  | -0.31598000 |
| B  | -1.32729000 | -1.32450100 | -0.97383000 |
| C  | 1.73068700  | -1.42558500 | 0.95288900  |
| C  | 1.09484900  | -0.45526400 | 1.74328000  |
| C  | 1.28629400  | 0.92129700  | 1.53730500  |
| B  | 2.73875100  | -1.07139100 | -0.12526400 |
| C  | -2.59150300 | -1.29879200 | -0.20536400 |
| C  | 2.84982600  | 0.40895600  | -0.37469500 |
| B  | 2.26784500  | 1.47162400  | 0.51853100  |
| B  | -3.21566700 | -0.00039300 | 0.12087400  |
| Be | 0.89323200  | 0.01099000  | -0.22601900 |
| F  | -0.67344600 | 2.44175500  | -1.33990000 |
| F  | -0.04747500 | 0.06238800  | -2.62350900 |
| F  | -2.95398000 | 2.52934700  | 0.06401600  |
| F  | -4.42402600 | 0.17891700  | 0.77568000  |
| F  | -3.27085100 | -2.51058800 | 0.10917800  |
| F  | 0.18449000  | -0.85333900 | 2.65454900  |
| F  | 0.49679000  | 1.74823100  | 2.30079400  |
| F  | 1.35909400  | -2.72427400 | 1.19719400  |
| F  | 2.44652400  | 2.82061200  | 0.35469400  |
| F  | 3.56939700  | 0.82706100  | -1.50132500 |
| F  | 3.34556700  | -2.04141800 | -0.88156600 |
| F  | -0.74622400 | -2.46271800 | -1.49493700 |

[Be(B<sub>2</sub>C<sub>4</sub>F<sub>6</sub>)<sub>2</sub>]<sup>2-</sup>-m-2

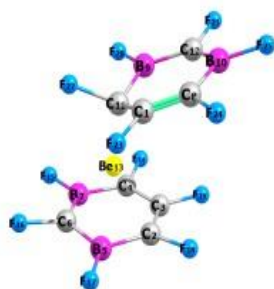

E (B3LYP/6-311++G(d,p)) = -1617.97818967

|                                              |                             |
|----------------------------------------------|-----------------------------|
| Zero-point correction=                       | 0.096406 (Hartree/Particle) |
| Thermal correction to Energy=                | 0.119939                    |
| Thermal correction to Enthalpy=              | 0.120883                    |
| Thermal correction to Gibbs Free Energy=     | 0.041433                    |
| Sum of electronic and zero-point Energies=   | -1617.881784                |
| Sum of electronic and thermal Energies=      | -1617.858250                |
| Sum of electronic and thermal Enthalpies=    | -1617.857306                |
| Sum of electronic and thermal Free Energies= | -1617.936757                |

Charge = -2 Multiplicity = 1

|    |             |             |             |
|----|-------------|-------------|-------------|
| C  | 1.28712500  | 1.26423500  | -0.98161900 |
| C  | -1.28640300 | 0.92156000  | 1.53712500  |
| C  | -1.09475800 | -0.45493500 | 1.74335900  |
| C  | -1.73047300 | -1.42549800 | 0.95316500  |
| B  | -2.26804200 | 1.47155200  | 0.51825500  |
| C  | -2.84988900 | 0.40862900  | -0.37475500 |
| B  | -2.73860700 | -1.07165500 | -0.12503700 |
| C  | 2.45272000  | 1.29270600  | -0.31598300 |
| B  | 1.32728000  | -1.32451300 | -0.97385000 |
| B  | 3.21564900  | -0.00040400 | 0.12086700  |
| C  | 0.54090500  | 0.03167600  | -1.24439300 |
| C  | 2.59149000  | -1.29880300 | -0.20538100 |
| Be | -0.89324100 | 0.01095900  | -0.22603300 |
| F  | -1.35869000 | -2.72408700 | 1.19771200  |
| F  | -3.34530600 | -2.04191100 | -0.88113800 |
| F  | -3.56953600 | 0.82641700  | -1.50145400 |
| F  | -2.44690900 | 2.82048300  | 0.35415500  |
| F  | -0.49700100 | 1.74875100  | 2.30044000  |
| F  | -0.18432400 | -0.85270600 | 2.65468600  |
| F  | 0.74621300  | -2.46273000 | -1.49495800 |
| F  | 3.27084000  | -2.51060000 | 0.10915900  |
| F  | 0.04746500  | 0.06238300  | -2.62352600 |
| F  | 0.67342900  | 2.44174400  | -1.33990700 |
| F  | 2.95395600  | 2.52933500  | 0.06402000  |
| F  | 4.42400300  | 0.17890600  | 0.77568200  |

[Be(B<sub>2</sub>C<sub>4</sub>F<sub>6</sub>)<sub>2</sub>]<sup>2-</sup>-m-3



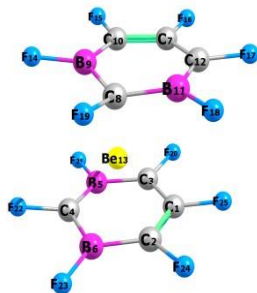

E (B3LYP/6-311++G(d,p)) = -1617.97874704

|                                              |                             |
|----------------------------------------------|-----------------------------|
| Zero-point correction=                       | 0.096145 (Hartree/Particle) |
| Thermal correction to Energy=                | 0.119741                    |
| Thermal correction to Enthalpy=              | 0.120685                    |
| Thermal correction to Gibbs Free Energy=     | 0.042438                    |
| Sum of electronic and zero-point Energies=   | -1617.882602                |
| Sum of electronic and thermal Energies=      | -1617.859006                |
| Sum of electronic and thermal Enthalpies=    | -1617.858062                |
| Sum of electronic and thermal Free Energies= | -1617.936309                |

Charge = -2 Multiplicity = 1

|    |             |             |             |
|----|-------------|-------------|-------------|
| C  | 1.12629700  | -1.25408000 | 1.28870500  |
| C  | 2.18975600  | -1.23627700 | 0.37883700  |
| C  | 0.56121000  | -0.07310600 | 1.80670700  |
| C  | 2.20442200  | 1.29036600  | 0.46432800  |
| B  | 1.13808000  | 1.30432300  | 1.52752500  |
| B  | 2.86979700  | 0.04796200  | -0.05952200 |
| C  | -2.70253400 | 0.00720400  | 0.01555300  |
| C  | -0.33269900 | 0.04237900  | -1.64569200 |
| B  | -1.06344500 | 1.36262100  | -1.33976700 |
| C  | -2.22257000 | 1.24966500  | -0.39672100 |
| B  | -0.99980100 | -1.30114900 | -1.30441200 |
| C  | -2.16522200 | -1.22117100 | -0.36787800 |
| Be | 0.68998800  | 0.12267900  | -0.17712500 |
| F  | -0.67274100 | 2.56616100  | -1.89327300 |
| F  | -2.93764800 | 2.36239400  | 0.06019800  |
| F  | -3.78343300 | -0.00828100 | 0.85933300  |
| F  | -2.81730000 | -2.35527500 | 0.13025900  |
| F  | -0.53930200 | -2.50068400 | -1.81332100 |
| F  | 0.56947200  | 0.04884800  | -2.76790300 |
| F  | -0.53836300 | -0.24743700 | 2.60895300  |
| F  | 0.60466300  | 2.43153900  | 2.09239800  |
| F  | 2.62635100  | 2.52182900  | -0.05357600 |
| F  | 3.90227100  | 0.03028600  | -0.96533000 |
| F  | 2.54304900  | -2.45764900 | -0.14849500 |

F 0.55019700 -2.43499400 1.59368200

[Be(B<sub>2</sub>C<sub>4</sub>F<sub>6</sub>)<sub>2</sub>]<sup>2-</sup>-o-1

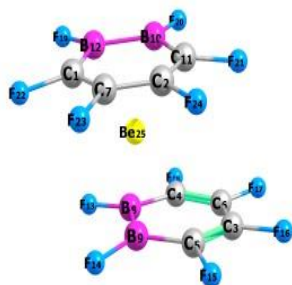

E (B3LYP/6-311++G(d,p)) = -1617.91306536

|                                              |                             |
|----------------------------------------------|-----------------------------|
| Zero-point correction=                       | 0.095828 (Hartree/Particle) |
| Thermal correction to Energy=                | 0.119411                    |
| Thermal correction to Enthalpy=              | 0.120355                    |
| Thermal correction to Gibbs Free Energy=     | 0.041982                    |
| Sum of electronic and zero-point Energies=   | -1617.817237                |
| Sum of electronic and thermal Energies=      | -1617.793654                |
| Sum of electronic and thermal Enthalpies=    | -1617.792710                |
| Sum of electronic and thermal Free Energies= | -1617.871083                |

Charge = -2 Multiplicity = 1

|   |             |             |             |
|---|-------------|-------------|-------------|
| C | -2.67942500 | -0.06955300 | -0.05854800 |
| C | -1.01781000 | -1.14248500 | 1.39211100  |
| C | 2.52515200  | -0.60223600 | -0.08563700 |
| C | 1.56006500  | 1.44846300  | -0.99528800 |
| C | 1.61673000  | -1.42843200 | -0.72468400 |
| C | 2.49782600  | 0.79234200  | -0.21618100 |
| C | -2.04234700 | -1.22753400 | 0.45160000  |
| B | 0.48493700  | 0.72821800  | -1.79709000 |
| B | 0.51831000  | -0.91195500 | -1.64055800 |
| B | -1.19052600 | 1.43171900  | 1.53270500  |
| C | -0.55989300 | 0.10722700  | 1.88059600  |
| B | -2.39864700 | 1.32968500  | 0.42142200  |
| F | -0.30150600 | 1.47665100  | -2.69309600 |
| F | -0.25151700 | -1.84684500 | -2.35915900 |
| F | 1.84734000  | -2.78927600 | -0.55397100 |
| F | 3.46367900  | -1.13546300 | 0.76469300  |
| F | 3.40920600  | 1.50940300  | 0.52113100  |
| F | 1.72972200  | 2.82366300  | -1.07459900 |
| F | -3.06098600 | 2.38852900  | -0.18459100 |
| F | -0.62845700 | 2.59075500  | 2.04388700  |

|    |             |             |             |
|----|-------------|-------------|-------------|
| F  | 0.57230100  | 0.00440300  | 2.66209400  |
| F  | -3.54043800 | -0.33928900 | -1.10451500 |
| F  | -2.38005800 | -2.45158300 | -0.01876200 |
| F  | -0.41237100 | -2.28610900 | 1.78559600  |
| Be | -0.62359900 | 0.08534000  | -0.13614400 |

[Be(B<sub>2</sub>C<sub>4</sub>F<sub>6</sub>)<sub>2</sub>]<sup>2-</sup>-o-2

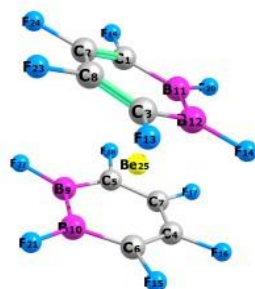

E (B3LYP/6-311++G(d,p)) = -1617.91186248

|                                              |                             |
|----------------------------------------------|-----------------------------|
| Zero-point correction=                       | 0.095606 (Hartree/Particle) |
| Thermal correction to Energy=                | 0.119331                    |
| Thermal correction to Enthalpy=              | 0.120275                    |
| Thermal correction to Gibbs Free Energy=     | 0.040649                    |
| Sum of electronic and zero-point Energies=   | -1617.816257                |
| Sum of electronic and thermal Energies=      | -1617.792531                |
| Sum of electronic and thermal Enthalpies=    | -1617.791587                |
| Sum of electronic and thermal Free Energies= | -1617.871213                |

Charge = -2 Multiplicity = 1

|   |             |             |             |
|---|-------------|-------------|-------------|
| C | 1.60997300  | 1.43705800  | -0.83301200 |
| C | 2.54432600  | 0.69238200  | -0.12699100 |
| C | 1.60830400  | -1.45035000 | -0.83115500 |
| C | -2.45586000 | -0.61192400 | -0.03224800 |
| C | -1.56203100 | 1.44085100  | 0.96854600  |
| C | -1.69862300 | -1.43154500 | 0.83718900  |
| C | -2.39011400 | 0.77880600  | 0.03116500  |
| C | 2.54353800  | -0.70584400 | -0.12625900 |
| B | -0.74881500 | 0.73472500  | 2.02392000  |
| B | -0.82685000 | -0.90366700 | 1.94913400  |
| B | 0.52928700  | 0.81559500  | -1.70316900 |
| B | 0.52863400  | -0.82845800 | -1.70208700 |
| F | 1.79695000  | -2.82396100 | -0.76944000 |
| F | -0.27447200 | -1.67640500 | -2.48818100 |
| F | -1.77654700 | -2.77229100 | 0.53065800  |
| F | -3.22118800 | -1.17207200 | -1.00089200 |

|    |             |             |             |
|----|-------------|-------------|-------------|
| F  | -3.09901100 | 1.49494300  | -0.87512900 |
| F  | -1.51237800 | 2.80524300  | 0.78453700  |
| F  | 1.80180100  | 2.81051700  | -0.77460300 |
| F  | -0.27034800 | 1.66419600  | -2.49315600 |
| F  | -0.09161100 | -1.80866600 | 2.70173100  |
| F  | 0.06718300  | 1.49424700  | 2.85107500  |
| F  | 3.47783200  | -1.33685300 | 0.65771500  |
| F  | 3.48030000  | 1.32332900  | 0.65497100  |
| Be | -0.50373700 | -0.00190300 | -0.04399400 |

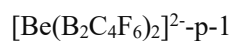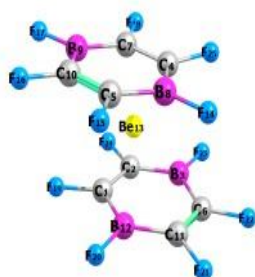

E (B3LYP/6-311++G(d,p)) = -1617.96630816

|                                              |                             |
|----------------------------------------------|-----------------------------|
| Zero-point correction=                       | 0.095939 (Hartree/Particle) |
| Thermal correction to Energy=                | 0.119540                    |
| Thermal correction to Enthalpy=              | 0.120484                    |
| Thermal correction to Gibbs Free Energy=     | 0.042815                    |
| Sum of electronic and zero-point Energies=   | -1617.870369                |
| Sum of electronic and thermal Energies=      | -1617.846768                |
| Sum of electronic and thermal Enthalpies=    | -1617.845824                |
| Sum of electronic and thermal Free Energies= | -1617.923493                |

Charge = -2 Multiplicity = 1

|   |             |             |             |
|---|-------------|-------------|-------------|
| C | -0.48411100 | -0.33662000 | -1.77468700 |
| C | -1.23356600 | -1.38877300 | -1.11886900 |
| B | -2.35684000 | -1.09789400 | -0.18041500 |
| C | 0.48412300  | -0.33661900 | 1.77470700  |
| C | 1.99399300  | 1.38449400  | 0.62577600  |
| C | -2.69662400 | 0.38392300  | -0.00827200 |
| C | 1.23357400  | -1.38878300 | 1.11889400  |
| B | 0.80825500  | 1.11079700  | 1.55245000  |
| B | 2.35682300  | -1.09790400 | 0.18040400  |
| C | 2.69661200  | 0.38391400  | 0.00825900  |
| C | -1.99398200 | 1.38450000  | -0.62576500 |
| B | -0.80823500 | 1.11079800  | -1.55242700 |

|    |             |             |             |
|----|-------------|-------------|-------------|
| Be | 0.00007000  | -0.46301300 | -0.00001600 |
| F  | 0.13752100  | 2.13521700  | 2.18537500  |
| F  | 2.38370300  | 2.68701300  | 0.39090700  |
| F  | 3.73631600  | 0.74777700  | -0.82596700 |
| F  | 3.07393700  | -2.07894100 | -0.48040800 |
| F  | 0.86689000  | -2.68739500 | 1.44793300  |
| F  | 0.43844400  | -0.73664700 | -2.73153200 |
| F  | -0.13750000 | 2.13521900  | -2.18537100 |
| F  | -2.38368700 | 2.68702100  | -0.39089700 |
| F  | -3.73634100 | 0.74779100  | 0.82593800  |
| F  | -3.07397100 | -2.07893200 | 0.48039300  |
| F  | -0.86688300 | -2.68738800 | -1.44790600 |
| F  | -0.43847500 | -0.73664000 | 2.73150800  |

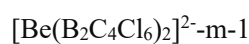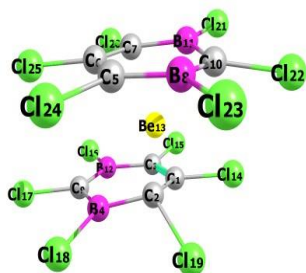

E (B3LYP/6-311++G(d,p)) = -5942.29478853

|                                              |                             |
|----------------------------------------------|-----------------------------|
| Zero-point correction=                       | 0.080993 (Hartree/Particle) |
| Thermal correction to Energy=                | 0.108501                    |
| Thermal correction to Enthalpy=              | 0.109445                    |
| Thermal correction to Gibbs Free Energy=     | 0.019993                    |
| Sum of electronic and zero-point Energies=   | -5942.213795                |
| Sum of electronic and thermal Energies=      | -5942.186287                |
| Sum of electronic and thermal Enthalpies=    | -5942.185343                |
| Sum of electronic and thermal Free Energies= | -5942.274796                |

Charge = -2 Multiplicity = 1

|   |             |             |             |
|---|-------------|-------------|-------------|
| C | -0.93163400 | 1.27197700  | -1.32435300 |
| C | -0.15026600 | 0.02634200  | -1.47017900 |
| C | -2.16955500 | 1.28575800  | -0.76900600 |
| B | -0.93392000 | -1.32541100 | -1.32060700 |
| C | 2.04729800  | -1.35773200 | 0.90062700  |
| C | 0.84601200  | -1.12670700 | 1.61135000  |
| C | 0.39041400  | 0.18891700  | 1.86343900  |
| B | 2.94833300  | -0.22980000 | 0.42950500  |

|    |             |             |             |
|----|-------------|-------------|-------------|
| C  | -2.26568800 | -1.31256600 | -0.68497900 |
| C  | 2.39281700  | 1.14789200  | 0.62728000  |
| B  | 1.20627100  | 1.42169200  | 1.50275000  |
| B  | -2.92120400 | -0.02276700 | -0.40069100 |
| Be | 0.90414400  | 0.02389600  | -0.06180900 |
| Cl | -0.11008500 | 2.78571100  | -1.73522900 |
| Cl | -2.93446900 | 2.84367100  | -0.38624900 |
| Cl | -4.58102200 | 0.10427400  | 0.35150100  |
| Cl | -3.11447800 | -2.85610400 | -0.32182000 |
| Cl | -0.11111500 | -2.86049500 | -1.84922900 |
| Cl | 0.96829200  | 0.05754500  | -2.94290200 |
| Cl | -1.19769400 | 0.40313200  | 2.59167500  |
| Cl | 0.63333600  | 3.07249200  | 1.93048100  |
| Cl | 3.24246500  | 2.52299200  | -0.12482700 |
| Cl | 4.48121300  | -0.57117800 | -0.46269800 |
| Cl | 2.52624300  | -3.02339000 | 0.57346400  |
| Cl | -0.15976600 | -2.48202900 | 2.06215000  |

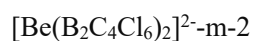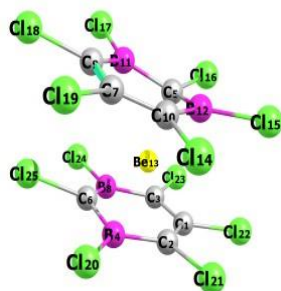

E (B3LYP/6-311++G(d,p)) = -5942.28654985

|                                              |                             |
|----------------------------------------------|-----------------------------|
| Zero-point correction=                       | 0.081956 (Hartree/Particle) |
| Thermal correction to Energy=                | 0.109007                    |
| Thermal correction to Enthalpy=              | 0.109951                    |
| Thermal correction to Gibbs Free Energy=     | 0.021078                    |
| Sum of electronic and zero-point Energies=   | -5942.198195                |
| Sum of electronic and thermal Energies=      | -5942.171144                |
| Sum of electronic and thermal Enthalpies=    | -5942.170200                |
| Sum of electronic and thermal Free Energies= | -5942.259073                |

Charge = -2 Multiplicity = 1

|   |             |             |            |
|---|-------------|-------------|------------|
| C | -2.26619000 | -1.05030800 | 0.80857800 |
| C | -1.02877200 | -1.39533400 | 1.40999400 |
| C | -2.66127600 | 0.30057700  | 0.67461200 |
| B | -0.09251400 | -0.35814100 | 2.01505500 |

|    |             |             |             |
|----|-------------|-------------|-------------|
| C  | -0.15217000 | 0.05972500  | -1.60178100 |
| C  | -0.47631600 | 1.06491700  | 1.72967000  |
| C  | 2.66216200  | -0.02465400 | -0.51911900 |
| B  | -1.83724100 | 1.45839800  | 1.22807100  |
| C  | 2.10022600  | 1.21077900  | -0.86593500 |
| C  | 1.98653900  | -1.22287900 | -0.78360600 |
| B  | 0.68315900  | 1.32521800  | -1.49355900 |
| B  | 0.60389500  | -1.24844600 | -1.49272800 |
| Be | -0.77414000 | 0.06909600  | 0.08601700  |
| Cl | 2.72551200  | -2.72791100 | -0.34914000 |
| Cl | -0.01396100 | -2.77564000 | -2.15286800 |
| Cl | -1.60403500 | 0.10417800  | -2.67266900 |
| Cl | 0.10108200  | 2.90017900  | -2.06002500 |
| Cl | 3.02688600  | 2.65670800  | -0.62927300 |
| Cl | 4.24014500  | -0.07411400 | 0.23426100  |
| Cl | 1.46700300  | -0.83745500 | 2.75627700  |
| Cl | -0.55900300 | -3.09012200 | 1.45095400  |
| Cl | -3.24305200 | -2.30592700 | 0.08591500  |
| Cl | -4.14958900 | 0.65843300  | -0.18775100 |
| Cl | -2.37479700 | 3.15447900  | 1.03629800  |
| Cl | 0.69703400  | 2.34787000  | 2.09138900  |

[Be(B<sub>2</sub>C<sub>4</sub>Cl<sub>6</sub>)<sub>2</sub>]<sup>2-</sup>-m-3

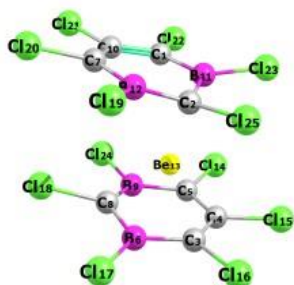

E (B3LYP/6-311++G(d,p)) = -5942.28654831

|                                              |                             |
|----------------------------------------------|-----------------------------|
| Zero-point correction=                       | 0.081957 (Hartree/Particle) |
| Thermal correction to Energy=                | 0.109007                    |
| Thermal correction to Enthalpy=              | 0.109951                    |
| Thermal correction to Gibbs Free Energy=     | 0.021078                    |
| Sum of electronic and zero-point Energies=   | -5942.198195                |
| Sum of electronic and thermal Energies=      | -5942.171144                |
| Sum of electronic and thermal Enthalpies=    | -5942.170200                |
| Sum of electronic and thermal Free Energies= | -5942.259073                |

Charge = -2 Multiplicity = 1

|    |             |             |             |
|----|-------------|-------------|-------------|
| C  | -1.98653200 | -1.22287900 | -0.78358400 |
| C  | 0.15216600  | 0.05972800  | -1.60177000 |
| C  | 2.66127200  | 0.30068000  | 0.67464000  |
| C  | 2.26627400  | -1.05023700 | 0.80856300  |
| C  | 1.02887600  | -1.39536300 | 1.40996300  |
| B  | 1.83715100  | 1.45842900  | 1.22811800  |
| C  | -2.10023700 | 1.21077600  | -0.86592200 |
| C  | 0.47625300  | 1.06484000  | 1.72970200  |
| B  | 0.09253700  | -0.35825200 | 2.01503300  |
| C  | -2.66216600 | -0.02465800 | -0.51910400 |
| B  | -0.60391000 | -1.24843800 | -1.49274800 |
| B  | -0.68316700 | 1.32522000  | -1.49353200 |
| Be | 0.77417500  | 0.06907000  | 0.08601000  |
| Cl | 0.55921600  | -3.09018200 | 1.45085300  |
| Cl | 3.24322400  | -2.30576800 | 0.08586700  |
| Cl | 4.14956700  | 0.65865700  | -0.18770300 |
| Cl | 2.37458000  | 3.15454700  | 1.03637200  |
| Cl | -0.69718700 | 2.34770400  | 2.09144600  |
| Cl | -0.10107900 | 2.90017800  | -2.05996700 |
| Cl | -3.02690000 | 2.65670100  | -0.62926500 |
| Cl | -4.24014700 | -0.07412800 | 0.23427700  |
| Cl | -2.72546100 | -2.72791200 | -0.34905700 |
| Cl | 0.01389800  | -2.77561600 | -2.15298000 |
| Cl | -1.46696700 | -0.83769700 | 2.75618000  |
| Cl | 1.60401100  | 0.10419900  | -2.67268700 |

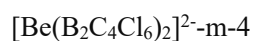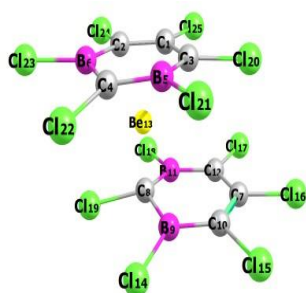

$E(\text{B3LYP/6-311++G(d,p)}) = -5942.29829286$

|                                            |                             |
|--------------------------------------------|-----------------------------|
| Zero-point correction=                     | 0.080773 (Hartree/Particle) |
| Thermal correction to Energy=              | 0.108318                    |
| Thermal correction to Enthalpy=            | 0.109262                    |
| Thermal correction to Gibbs Free Energy=   | 0.020231                    |
| Sum of electronic and zero-point Energies= | -5942.217520                |
| Sum of electronic and thermal Energies=    | -5942.189975                |



Sum of electronic and thermal Enthalpies= -5942.189031  
 Sum of electronic and thermal Free Energies= -5942.278062

Charge = -2 Multiplicity = 1

|    |             |             |             |
|----|-------------|-------------|-------------|
| C  | 0.77545100  | -1.19376000 | 1.58494400  |
| C  | 2.02222200  | -1.28010200 | 0.92925400  |
| C  | 0.18561600  | 0.06076300  | 1.87469600  |
| C  | 2.15776000  | 1.25730700  | 0.80937500  |
| B  | 0.89731100  | 1.38034400  | 1.61301500  |
| B  | 2.84651200  | -0.05266900 | 0.58105200  |
| C  | -2.67970700 | 0.04026500  | -0.49956800 |
| C  | 0.02228800  | -0.04462500 | -1.63684900 |
| B  | -0.72127200 | 1.28746400  | -1.50017300 |
| C  | -2.05804400 | 1.25459100  | -0.81696200 |
| B  | -0.77345500 | -1.33464500 | -1.42694300 |
| C  | -2.11043400 | -1.21504900 | -0.76116600 |
| Be | 0.77819800  | 0.06626800  | -0.02719800 |
| Cl | -0.01482900 | 2.84202900  | -2.10994500 |
| Cl | -2.90338500 | 2.78214100  | -0.47148900 |
| Cl | -4.28592600 | 0.09158800  | 0.26344300  |
| Cl | -3.03369900 | -2.68794300 | -0.36587300 |
| Cl | -0.12162400 | -2.95064600 | -1.94128400 |
| Cl | 1.46065600  | -0.10677700 | -2.76177900 |
| Cl | -1.42470400 | 0.08751600  | 2.58412700  |
| Cl | 0.14916300  | 2.94924500  | 2.07222200  |
| Cl | 2.93065300  | 2.74073600  | 0.19558200  |
| Cl | 4.46826200  | -0.21144200 | -0.19781800 |
| Cl | 2.64282200  | -2.87524600 | 0.49965400  |
| Cl | -0.11734200 | -2.65790000 | 1.93149500  |

[Be(B<sub>2</sub>C<sub>4</sub>Cl<sub>6</sub>)<sub>2</sub>]<sup>2-</sup>-o-1

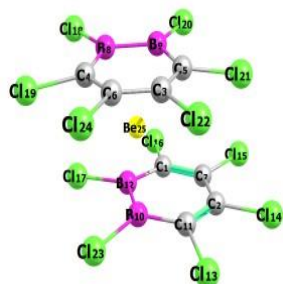

E (B3LYP/6-311++G(d,p)) = -5942.22557038

Zero-point correction= 0.080274 (Hartree/Particle)  
 Thermal correction to Energy= 0.107902

|                                              |              |
|----------------------------------------------|--------------|
| Thermal correction to Enthalpy=              | 0.108846     |
| Thermal correction to Gibbs Free Energy=     | 0.018474     |
| Sum of electronic and zero-point Energies=   | -5942.145296 |
| Sum of electronic and thermal Energies=      | -5942.117668 |
| Sum of electronic and thermal Enthalpies=    | -5942.116724 |
| Sum of electronic and thermal Free Energies= | -5942.207096 |

Charge = -2 Multiplicity = 1

|    |             |             |             |
|----|-------------|-------------|-------------|
| C  | -1.16075900 | 1.45228800  | 1.30056700  |
| C  | -2.43882600 | -0.56873500 | 0.70790900  |
| C  | 0.74617800  | -1.23103200 | -1.62792300 |
| C  | 2.59678700  | 0.07192400  | -0.62779900 |
| C  | 0.02487800  | -0.03914000 | -1.95185900 |
| C  | 2.00439400  | -1.17478200 | -0.99494500 |
| C  | -2.29883400 | 0.84000600  | 0.77137200  |
| B  | 2.03838100  | 1.40085200  | -1.03976900 |
| B  | 0.59395500  | 1.33862200  | -1.78548500 |
| B  | -0.11960800 | -0.94884100 | 1.70068000  |
| C  | -1.43638900 | -1.43650900 | 1.14478500  |
| B  | 0.02294500  | 0.66279700  | 1.81461800  |
| Cl | -1.80293500 | -3.18391400 | 1.17272900  |
| Cl | -3.93233000 | -1.23008500 | 0.02197000  |
| Cl | -3.60945400 | 1.83727800  | 0.12414100  |
| Cl | -1.16533900 | 3.22113300  | 1.46885500  |
| Cl | 1.41119900  | 1.50073300  | 2.67786200  |
| Cl | 2.87284000  | 2.94550200  | -0.58619900 |
| Cl | 4.05608300  | -0.00884300 | 0.37823500  |
| Cl | -0.37924900 | 2.79904400  | -2.23375900 |
| Cl | -1.62133800 | -0.24952000 | -2.57982000 |
| Cl | 0.04430400  | -2.79654900 | -1.97664800 |
| Cl | 1.09488100  | -2.13003800 | 2.42669000  |
| Cl | 2.82930500  | -2.67877200 | -0.63861000 |
| Be | 0.63290600  | -0.04818100 | -0.03135600 |

[Be(B<sub>2</sub>C<sub>4</sub>Cl<sub>6</sub>)<sub>2</sub>]<sup>2-</sup>-o-2

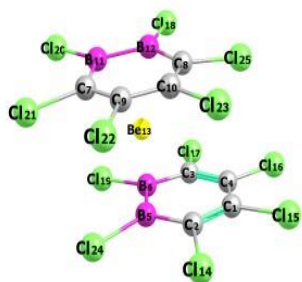

E (B3LYP/6-311++G(d,p)) = -5942.22640934

|                                              |                             |
|----------------------------------------------|-----------------------------|
| Zero-point correction=                       | 0.080286 (Hartree/Particle) |
| Thermal correction to Energy=                | 0.107889                    |
| Thermal correction to Enthalpy=              | 0.108833                    |
| Thermal correction to Gibbs Free Energy=     | 0.019453                    |
| Sum of electronic and zero-point Energies=   | -5942.146123                |
| Sum of electronic and thermal Energies=      | -5942.118520                |
| Sum of electronic and thermal Enthalpies=    | -5942.117576                |
| Sum of electronic and thermal Free Energies= | -5942.206956                |

Charge = -2 Multiplicity = 1

|    |             |             |             |
|----|-------------|-------------|-------------|
| C  | 2.45282900  | -0.61958200 | -0.60337300 |
| C  | 1.43323600  | -1.45073100 | -1.06635100 |
| C  | 1.29470800  | 1.44244200  | -1.28875900 |
| C  | 2.39199100  | 0.79193100  | -0.72656600 |
| B  | 0.16290500  | -0.91506400 | -1.68431600 |
| B  | 0.07745200  | 0.70101100  | -1.79806200 |
| C  | -2.58671700 | -0.48185800 | 0.61862400  |
| C  | -0.18726600 | 0.52857800  | 1.88738700  |
| C  | -1.58917600 | -1.36645400 | 1.13390700  |
| C  | -0.42423400 | -0.87337700 | 1.76009500  |
| B  | -2.54532100 | 1.00496000  | 0.80443800  |
| B  | -1.19520600 | 1.57377400  | 1.50664500  |
| Be | -0.69129200 | 0.01750300  | -0.00292900 |
| Cl | 1.71251200  | -3.21322400 | -1.02810900 |
| Cl | 3.86700300  | -1.32607100 | 0.19742200  |
| Cl | 3.76445100  | 1.73986300  | -0.12791800 |
| Cl | 1.39729300  | 3.20317600  | -1.51610200 |
| Cl | -0.82213100 | 3.33673600  | 1.70347800  |
| Cl | -1.26437300 | 1.59083200  | -2.68839200 |
| Cl | -3.87187700 | 2.06308100  | 0.15848600  |
| Cl | -3.92254200 | -1.22376100 | -0.28325600 |
| Cl | -1.77677100 | -3.09815000 | 0.96205100  |
| Cl | 0.78127000  | -2.01381700 | 2.31423700  |
| Cl | -1.05601900 | -2.05682600 | -2.45957300 |
| Cl | 1.40023100  | 1.01468400  | 2.50758100  |

[Be(B<sub>2</sub>C<sub>4</sub>Cl<sub>6</sub>)<sub>2</sub>]<sup>2-</sup>-o-3

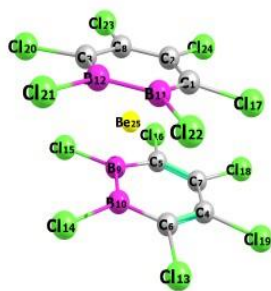

E (B3LYP/6-311++G(d,p)) = -5942.22640067

|                                              |                             |
|----------------------------------------------|-----------------------------|
| Zero-point correction=                       | 0.080268 (Hartree/Particle) |
| Thermal correction to Energy=                | 0.107879                    |
| Thermal correction to Enthalpy=              | 0.108823                    |
| Thermal correction to Gibbs Free Energy=     | 0.019421                    |
| Sum of electronic and zero-point Energies=   | -5942.146133                |
| Sum of electronic and thermal Energies=      | -5942.118522                |
| Sum of electronic and thermal Enthalpies=    | -5942.117578                |
| Sum of electronic and thermal Free Energies= | -5942.206980                |

Charge = -2 Multiplicity = 1

|    |             |             |             |
|----|-------------|-------------|-------------|
| C  | -0.18340000 | 0.52017700  | -1.88922900 |
| C  | -0.42830900 | -0.88008200 | -1.75881500 |
| C  | -2.58845700 | -0.47398300 | -0.61826900 |
| C  | 2.39176800  | 0.79101900  | 0.72678500  |
| C  | 1.43129300  | -1.45055600 | 1.06863500  |
| C  | 1.29490900  | 1.44277700  | 1.28846600  |
| C  | 2.45158200  | -0.62058800 | 0.60484400  |
| C  | -1.59562200 | -1.36525100 | -1.13101600 |
| B  | 0.16134000  | -0.91347200 | 1.68604800  |
| B  | 0.07695200  | 0.70282200  | 1.79807300  |
| B  | -1.18552900 | 1.57188500  | -1.51124400 |
| B  | -2.53879400 | 1.01212600  | -0.80780200 |
| Cl | 1.39920900  | 3.20355100  | 1.51551100  |
| Cl | -1.26460700 | 1.59410400  | 2.68747500  |
| Cl | -1.05803900 | -2.05318400 | 2.46374000  |
| Cl | 1.70989000  | -3.21340400 | 1.03304500  |
| Cl | 1.40703600  | 0.99559400  | -2.51063600 |
| Cl | 3.86487800  | -1.32895200 | -0.19586200 |
| Cl | 3.76458400  | 1.73772400  | 0.12700100  |
| Cl | -3.92890600 | -1.20623400 | 0.28488700  |
| Cl | -3.85972800 | 2.07919400  | -0.16504900 |
| Cl | -0.80309000 | 3.33232700  | -1.71308900 |
| Cl | -1.79229700 | -3.09544300 | -0.95434800 |
| Cl | 0.76959700  | -2.02854500 | -2.31295500 |

Be -0.68935100 0.01691600 0.00274700

[Be(B<sub>2</sub>C<sub>4</sub>Cl<sub>6</sub>)<sub>2</sub>]<sup>2-</sup>-p-1

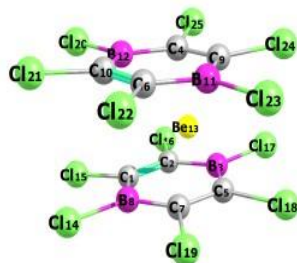

E (B3LYP/6-311++G(d,p)) = -5942.28580343

|                                              |                             |
|----------------------------------------------|-----------------------------|
| Zero-point correction=                       | 0.080710 (Hartree/Particle) |
| Thermal correction to Energy=                | 0.108258                    |
| Thermal correction to Enthalpy=              | 0.109202                    |
| Thermal correction to Gibbs Free Energy=     | 0.020389                    |
| Sum of electronic and zero-point Energies=   | -5942.205093                |
| Sum of electronic and thermal Energies=      | -5942.177546                |
| Sum of electronic and thermal Enthalpies=    | -5942.176602                |
| Sum of electronic and thermal Free Energies= | -5942.265414                |

Charge = -2 Multiplicity = 1

|    |             |             |             |
|----|-------------|-------------|-------------|
| C  | 1.92414400  | -1.35949900 | 0.99730000  |
| C  | 2.67513200  | -0.29364000 | 0.56633500  |
| B  | 2.19389600  | 1.15308500  | 0.72081200  |
| C  | -0.06010700 | 0.24673100  | -1.81862900 |
| C  | 0.89075000  | 1.37023200  | 1.41137400  |
| C  | -2.67510400 | -0.29402200 | -0.56648000 |
| C  | 0.06009700  | 0.24640200  | 1.81874100  |
| B  | 0.53758300  | -1.16234000 | 1.61677000  |
| C  | -0.89108000 | 1.37037800  | -1.41123000 |
| C  | -1.92385700 | -1.35967400 | -0.99755600 |
| B  | -2.19423700 | 1.15284500  | -0.72080100 |
| B  | -0.53729800 | -1.16214300 | -1.61691400 |
| Be | -0.00032300 | 0.50940900  | 0.00008900  |
| Cl | -0.45655100 | -2.57221600 | 2.15292400  |
| Cl | 2.55775700  | -3.00815300 | 0.86720400  |
| Cl | 4.25894400  | -0.57151900 | -0.18012200 |
| Cl | 3.20299600  | 2.54397600  | 0.13415500  |
| Cl | 0.33551700  | 3.01639800  | 1.78385500  |
| Cl | -1.41692500 | 0.54728700  | 2.76096800  |
| Cl | 0.45719500  | -2.57173400 | -2.15313700 |

|    |             |             |             |
|----|-------------|-------------|-------------|
| Cl | -2.55710100 | -3.00848100 | -0.86763700 |
| Cl | -4.25884700 | -0.57237400 | 0.17994200  |
| Cl | -3.20377600 | 2.54342600  | -0.13416700 |
| Cl | -0.33614300 | 3.01669500  | -1.78342400 |
| Cl | 1.41703400  | 0.54808900  | -2.76049200 |

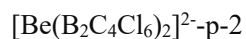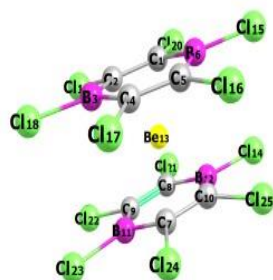

E (B3LYP/6-311++G(d,p)) = -5942.27160630

|                                              |                             |
|----------------------------------------------|-----------------------------|
| Zero-point correction=                       | 0.081389 (Hartree/Particle) |
| Thermal correction to Energy=                | 0.108608                    |
| Thermal correction to Enthalpy=              | 0.109552                    |
| Thermal correction to Gibbs Free Energy=     | 0.020466                    |
| Sum of electronic and zero-point Energies=   | -5942.190217                |
| Sum of electronic and thermal Energies=      | -5942.162999                |
| Sum of electronic and thermal Enthalpies=    | -5942.162054                |
| Sum of electronic and thermal Free Energies= | -5942.251140                |

Charge = -2 Multiplicity = 1

|    |             |             |             |
|----|-------------|-------------|-------------|
| C  | 0.12923900  | 0.78041800  | 1.84899000  |
| C  | 0.03770200  | -0.62728100 | 1.88227900  |
| B  | 1.18680600  | -1.52359200 | 1.45940700  |
| C  | 2.35985900  | -0.80637300 | 0.81797800  |
| C  | 2.42923200  | 0.59862300  | 0.73796800  |
| B  | 1.36440200  | 1.50015100  | 1.33575500  |
| C  | 0.13380200  | -0.44714100 | -1.69335400 |
| C  | -2.51638900 | 0.44364600  | -0.67230300 |
| C  | -2.30493500 | -0.90092200 | -0.81880100 |
| C  | -0.10363100 | 0.95238300  | -1.57825700 |
| B  | -0.97193500 | -1.44871900 | -1.34923300 |
| B  | -1.44571000 | 1.47194200  | -1.05934700 |
| Be | 0.62879700  | -0.00614700 | 0.07994000  |
| Cl | -1.75880200 | 3.21920600  | -0.96777900 |
| Cl | 1.47121700  | 3.27962300  | 1.27118900  |
| Cl | 3.77658700  | 1.34669600  | -0.10462000 |

|    |             |             |             |
|----|-------------|-------------|-------------|
| Cl | 3.63522800  | -1.77853700 | 0.10960000  |
| Cl | 1.10098100  | -3.30161400 | 1.57698700  |
| Cl | -1.45377800 | -1.38182500 | 2.41306100  |
| Cl | -1.24657800 | 1.74179600  | 2.35475500  |
| Cl | -4.05108000 | 1.03784700  | -0.06093800 |
| Cl | -3.57413400 | -2.05086800 | -0.43232800 |
| Cl | -0.71757700 | -3.18865000 | -1.59458300 |
| Cl | 1.54384500  | -1.01021600 | -2.60017900 |
| Cl | 1.02866300  | 2.09039900  | -2.28279300 |

[Mg(B<sub>2</sub>C<sub>4</sub>H<sub>6</sub>)<sub>2</sub>]<sup>2-</sup>-m-1

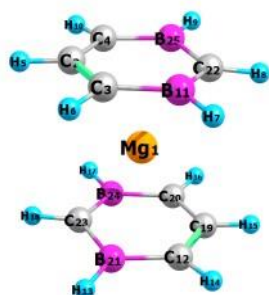

E (B3LYP/6-311++G(d,p)) = -611.821244398

|                                              |                             |
|----------------------------------------------|-----------------------------|
| Zero-point correction=                       | 0.180048 (Hartree/Particle) |
| Thermal correction to Energy=                | 0.193231                    |
| Thermal correction to Enthalpy=              | 0.194175                    |
| Thermal correction to Gibbs Free Energy=     | 0.138165                    |
| Sum of electronic and zero-point Energies=   | -611.641196                 |
| Sum of electronic and thermal Energies=      | -611.628014                 |
| Sum of electronic and thermal Enthalpies=    | -611.627070                 |
| Sum of electronic and thermal Free Energies= | -611.683080                 |

Charge = -2 Multiplicity = 1

|    |             |             |             |
|----|-------------|-------------|-------------|
| Mg | -0.00000700 | -0.00001500 | 0.00069800  |
| C  | -2.22817200 | 1.27734100  | -0.00298200 |
| C  | -2.13395100 | 0.61328200  | -1.24603600 |
| C  | -2.13546000 | 0.61821800  | 1.24281500  |
| H  | -2.32209000 | 2.36872700  | -0.00521000 |
| H  | -2.17267900 | 1.24889200  | -2.13291400 |
| H  | -1.86391200 | -1.45528300 | -2.40407700 |
| H  | -1.49945300 | -2.69278100 | 0.00534500  |
| H  | -1.86679500 | -1.44572800 | 2.40936000  |
| H  | -2.17529000 | 1.25735000  | 2.12711300  |
| B  | -1.94120300 | -0.90109400 | -1.32135800 |
| C  | 2.13396800  | -0.61327300 | -1.24603700 |

|   |             |             |             |
|---|-------------|-------------|-------------|
| H | 1.86388700  | 1.45528900  | -2.40407300 |
| H | 2.17271400  | -1.24888000 | -2.13291600 |
| H | 2.32214900  | -2.36871500 | -0.00521500 |
| H | 2.17532300  | -1.25734700 | 2.12711100  |
| H | 1.86676900  | 1.44572500  | 2.40936300  |
| H | 1.49940100  | 2.69277500  | 0.00535000  |
| C | 2.22820400  | -1.27733100 | -0.00298500 |
| C | 2.13547600  | -0.61821400 | 1.24281400  |
| B | 1.94118900  | 0.90109900  | -1.32135500 |
| C | -1.73600000 | -1.62273600 | 0.00306200  |
| C | 1.73597000  | 1.62273400  | 0.00306500  |
| B | 1.94276500  | 0.89583000  | 1.32436700  |
| B | -1.94277900 | -0.89583000 | 1.32436600  |

[Mg(B<sub>2</sub>C<sub>4</sub>H<sub>6</sub>)<sub>2</sub>]<sup>2-</sup>-m-2

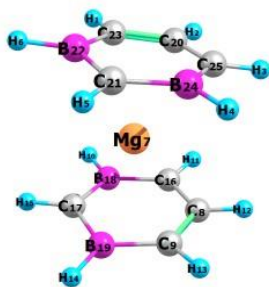

E (B3LYP/6-311++G(d,p)) = -611.82043871

|                                              |                             |
|----------------------------------------------|-----------------------------|
| Zero-point correction=                       | 0.180290 (Hartree/Particle) |
| Thermal correction to Energy=                | 0.193378                    |
| Thermal correction to Enthalpy=              | 0.194322                    |
| Thermal correction to Gibbs Free Energy=     | 0.140157                    |
| Sum of electronic and zero-point Energies=   | -611.640149                 |
| Sum of electronic and thermal Energies=      | -611.627061                 |
| Sum of electronic and thermal Enthalpies=    | -611.626117                 |
| Sum of electronic and thermal Free Energies= | -611.680282                 |

Charge = -2 Multiplicity = 1

|    |             |             |             |
|----|-------------|-------------|-------------|
| H  | 2.28011700  | 0.44948600  | -2.39122100 |
| H  | 1.99959400  | -1.82508500 | -1.65338500 |
| H  | 1.70470700  | -2.48050000 | 0.64532000  |
| H  | 1.69965500  | -0.71879100 | 2.73673500  |
| H  | 1.80549000  | 1.87822000  | 1.88619300  |
| H  | 2.32656100  | 2.59670300  | -0.69810400 |
| Mg | -0.00000300 | 0.19771400  | 0.00000000  |
| C  | -2.04335000 | -1.04141700 | 0.88999700  |



|   |             |             |             |
|---|-------------|-------------|-------------|
| C | -2.20056300 | 0.29582300  | 1.31295600  |
| H | -1.69966000 | -0.71887300 | -2.73671500 |
| H | -1.70470200 | -2.48051700 | -0.64525400 |
| H | -1.99958800 | -1.82503900 | 1.65343800  |
| H | -2.28011200 | 0.44955300  | 2.39120900  |
| H | -2.32656900 | 2.59672100  | 0.69802800  |
| H | -1.80549600 | 1.87816200  | -1.88625000 |
| C | -1.86359100 | -1.41591400 | -0.46182900 |
| C | -1.91335800 | 1.08379000  | -1.13954700 |
| B | -1.85355300 | -0.37220300 | -1.57796700 |
| B | -2.19782900 | 1.44819100  | 0.30921400  |
| C | 2.04335300  | -1.04144100 | -0.88996600 |
| C | 1.91335600  | 1.08382600  | 1.13951300  |
| B | 2.19782700  | 1.44818400  | -0.30925700 |
| C | 2.20056600  | 0.29578700  | -1.31296300 |
| B | 1.85355300  | -0.37215700 | 1.57797700  |
| C | 1.86359400  | -1.41590200 | 0.46186800  |

[Mg(B<sub>2</sub>C<sub>4</sub>H<sub>6</sub>)<sub>2</sub>]<sup>2-</sup>-o-1

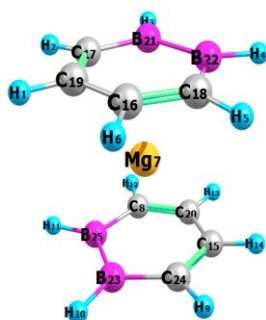

E (B3LYP/6-311++G(d,p)) = -611.76826237

|                                              |                             |
|----------------------------------------------|-----------------------------|
| Zero-point correction=                       | 0.180107 (Hartree/Particle) |
| Thermal correction to Energy=                | 0.193320                    |
| Thermal correction to Enthalpy=              | 0.194265                    |
| Thermal correction to Gibbs Free Energy=     | 0.139943                    |
| Sum of electronic and zero-point Energies=   | -611.588155                 |
| Sum of electronic and thermal Energies=      | -611.574942                 |
| Sum of electronic and thermal Enthalpies=    | -611.573998                 |
| Sum of electronic and thermal Free Energies= | -611.628319                 |

Charge = -2 Multiplicity = 1

|   |             |            |             |
|---|-------------|------------|-------------|
| H | -2.37634300 | 0.53277500 | -2.27961100 |
| H | -2.19303200 | 2.38533900 | -0.73689800 |
| H | -1.84814700 | 2.16146100 | 1.91487900  |

|    |             |             |             |
|----|-------------|-------------|-------------|
| H  | -1.57004400 | -0.86970800 | 2.77513000  |
| H  | -1.73250300 | -2.49469400 | 0.64704300  |
| H  | -2.15243500 | -1.77992000 | -1.62422500 |
| Mg | 0.00003700  | 0.12655300  | 0.00002700  |
| C  | 2.13733800  | 1.38806500  | 0.28728600  |
| H  | 1.73220400  | -2.49462400 | -0.64751900 |
| H  | 1.57005600  | -0.86922800 | -2.77531500 |
| H  | 1.84848400  | 2.16174100  | -1.91449400 |
| H  | 2.19328600  | 2.38509000  | 0.73733800  |
| H  | 2.37628400  | 0.53222000  | 2.27972100  |
| H  | 2.15210800  | -1.78032100 | 1.62390200  |
| C  | 2.12790100  | -1.02652700 | 0.83647200  |
| C  | -2.12808200 | -1.02627100 | -0.83665900 |
| C  | -2.13718500 | 1.38822300  | -0.28703200 |
| C  | -1.87227400 | -1.41678200 | 0.50896800  |
| C  | -2.25747500 | 0.31738900  | -1.21721600 |
| C  | 2.25744700  | 0.31704500  | 1.21728000  |
| B  | -1.94344200 | 1.17111400  | 1.20697700  |
| B  | -1.79644800 | -0.42481400 | 1.66054500  |
| B  | 1.79645900  | -0.42456900 | -1.66063900 |
| C  | 1.87210900  | -1.41675800 | -0.50924100 |
| B  | 1.94362500  | 1.17125400  | -1.20676800 |

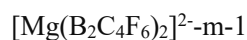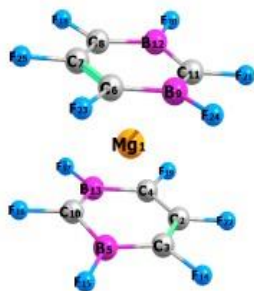

E (B3LYP/6-311++G(d,p)) = -1803.34836827

|                                              |                             |
|----------------------------------------------|-----------------------------|
| Zero-point correction=                       | 0.093234 (Hartree/Particle) |
| Thermal correction to Energy=                | 0.117996                    |
| Thermal correction to Enthalpy=              | 0.118940                    |
| Thermal correction to Gibbs Free Energy=     | 0.036986                    |
| Sum of electronic and zero-point Energies=   | -1803.255135                |
| Sum of electronic and thermal Energies=      | -1803.230372                |
| Sum of electronic and thermal Enthalpies=    | -1803.229428                |
| Sum of electronic and thermal Free Energies= | -1803.311383                |

Charge = -2 Multiplicity = 1

|    |             |             |             |
|----|-------------|-------------|-------------|
| Mg | 0.00000000  | 0.00002300  | 0.00000000  |
| C  | -2.47426400 | 0.00024300  | 0.89920100  |
| C  | -2.24354800 | 1.23246600  | 0.27156500  |
| C  | -2.24375000 | -1.23220900 | 0.27196000  |
| B  | -1.82504900 | 1.32867500  | -1.18567800 |
| C  | 2.24354800  | 1.23247100  | -0.27154400 |
| C  | 2.47426400  | 0.00025900  | -0.89920100 |
| C  | 2.24375100  | -1.23220400 | -0.27198100 |
| B  | 1.82504900  | 1.32865400  | 1.18570100  |
| C  | -1.48976300 | -0.00026500 | -1.83039900 |
| C  | 1.48976300  | -0.00029700 | 1.83039900  |
| B  | 1.82521300  | -1.32897000 | 1.18521200  |
| B  | -1.82521300 | -1.32894900 | -1.18523600 |
| F  | -2.52665100 | 2.35948900  | 1.03340400  |
| F  | -1.72442300 | 2.54966100  | -1.82403500 |
| F  | -1.06690000 | -0.00051400 | -3.17609800 |
| F  | -1.72469300 | -2.55016300 | -1.82317600 |
| F  | 2.52695100  | -2.35892600 | -1.03422200 |
| F  | -2.52695000 | -2.35894500 | 1.03418100  |
| F  | 1.72469300  | -2.55019500 | 1.82313100  |
| F  | 1.06689900  | -0.00057000 | 3.17609700  |
| F  | -2.91247700 | 0.00048800  | 2.19048000  |
| F  | 2.52665100  | 2.35950700  | -1.03336300 |
| F  | 1.72442300  | 2.54962900  | 1.82407900  |
| F  | 2.91247800  | 0.00052700  | -2.19048000 |

[Mg(B<sub>2</sub>C<sub>4</sub>F<sub>6</sub>)<sub>2</sub>]<sup>2-</sup>-m-2

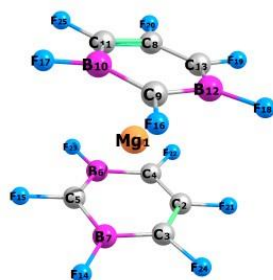

E (B3LYP/6-311++G(d,p)) = -1803.34743795

|                                            |                             |
|--------------------------------------------|-----------------------------|
| Zero-point correction=                     | 0.093336 (Hartree/Particle) |
| Thermal correction to Energy=              | 0.118025                    |
| Thermal correction to Enthalpy=            | 0.118969                    |
| Thermal correction to Gibbs Free Energy=   | 0.037577                    |
| Sum of electronic and zero-point Energies= | -1803.254102                |

|                                              |              |
|----------------------------------------------|--------------|
| Sum of electronic and thermal Energies=      | -1803.229413 |
| Sum of electronic and thermal Enthalpies=    | -1803.228469 |
| Sum of electronic and thermal Free Energies= | -1803.309861 |

Charge = -2 Multiplicity = 1

|    |             |             |             |
|----|-------------|-------------|-------------|
| Mg | -0.00000100 | 0.24501900  | -0.00000400 |
| C  | 2.16896000  | -1.05018200 | -0.61014800 |
| C  | 2.35655800  | 0.26382200  | -1.05739100 |
| C  | 1.80367000  | -1.36412900 | 0.70908300  |
| C  | 1.81033000  | 1.12028800  | 1.28135600  |
| B  | 1.70156600  | -0.30105800 | 1.79061100  |
| B  | 2.27531400  | 1.45507100  | -0.11799700 |
| C  | -2.16896000 | -1.05016400 | 0.61017300  |
| C  | -1.81033100 | 1.12026200  | -1.28138400 |
| B  | -2.27530800 | 1.45508100  | 0.11796400  |
| C  | -2.35654800 | 0.26385300  | 1.05738600  |
| B  | -1.70157500 | -0.30109700 | -1.79060500 |
| C  | -1.80367900 | -1.36414600 | -0.70905200 |
| F  | 2.55915400  | 2.73455500  | -0.55904800 |
| F  | 1.68043900  | 2.17282900  | 2.21185800  |
| F  | -1.68044100 | 2.17277900  | -2.21191300 |
| F  | -2.55914200 | 2.73457600  | 0.55898600  |
| F  | -1.47497000 | -0.64077100 | -3.11036700 |
| F  | -1.68018100 | -2.71762800 | -0.99318700 |
| F  | -2.31427300 | -2.06958300 | 1.50323000  |
| F  | 2.31427400  | -2.06962400 | -1.50317900 |
| F  | 1.68016900  | -2.71760500 | 0.99325200  |
| F  | 1.47495800  | -0.64070000 | 3.11038000  |
| F  | 2.69622100  | 0.40289800  | -2.39712500 |
| F  | -2.69620600 | 0.40296100  | 2.39711900  |

[Mg(B<sub>2</sub>C<sub>4</sub>F<sub>6</sub>)<sub>2</sub>]<sup>2-</sup>-o-1

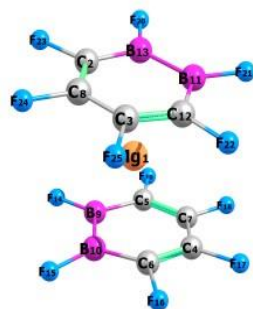

E (B3LYP/6-311++G(d,p)) = -1803.29016542

|                                              |                             |
|----------------------------------------------|-----------------------------|
| Zero-point correction=                       | 0.092868 (Hartree/Particle) |
| Thermal correction to Energy=                | 0.117706                    |
| Thermal correction to Enthalpy=              | 0.118651                    |
| Thermal correction to Gibbs Free Energy=     | 0.035996                    |
| Sum of electronic and zero-point Energies=   | -1803.197297                |
| Sum of electronic and thermal Energies=      | -1803.172459                |
| Sum of electronic and thermal Enthalpies=    | -1803.171515                |
| Sum of electronic and thermal Free Energies= | -1803.254170                |

Charge = -2 Multiplicity = 1

|    |             |             |             |
|----|-------------|-------------|-------------|
| Mg | 0.00004700  | 0.30835200  | 0.00024100  |
| C  | -2.42336400 | 1.29178100  | -0.06327000 |
| C  | -2.33831300 | -1.15295600 | -0.24949000 |
| C  | 2.33871500  | -1.15231100 | 0.25001400  |
| C  | 2.42288000  | 1.29221900  | 0.06256500  |
| C  | 1.72494800  | -1.30284000 | -1.01349900 |
| C  | 2.67612600  | 0.09466800  | 0.76477700  |
| C  | -2.67614700 | 0.09371300  | -0.76483300 |
| B  | 1.86509400  | 1.33550700  | -1.34532000 |
| B  | 1.47083600  | -0.14929100 | -1.96387700 |
| B  | -1.47083000 | -0.14858900 | 1.96400900  |
| C  | -1.72451800 | -1.30268800 | 1.01409100  |
| B  | -1.86553200 | 1.33591600  | 1.34463300  |
| F  | 1.78303500  | 2.56901500  | -2.00028200 |
| F  | 0.99743100  | -0.42674300 | -3.25040800 |
| F  | 1.51084500  | -2.62422100 | -1.37879200 |
| F  | 2.56604500  | -2.25318600 | 1.02723500  |
| F  | 3.20944000  | 0.14888100  | 2.02339400  |
| F  | 2.85801900  | 2.43468000  | 0.72432900  |
| F  | -1.78391200 | 2.56982100  | 1.99889300  |
| F  | -0.99744100 | -0.42515300 | 3.25073000  |
| F  | -1.50998600 | -2.62380600 | 1.38006800  |
| F  | -2.85887300 | 2.43371400  | -0.72567900 |
| F  | -3.20942200 | 0.14708900  | -2.02350200 |
| F  | -2.56522100 | -2.25425300 | -1.02623600 |

[Mg(B<sub>2</sub>C<sub>4</sub>F<sub>6</sub>)<sub>2</sub>]<sup>2-</sup>-o-2

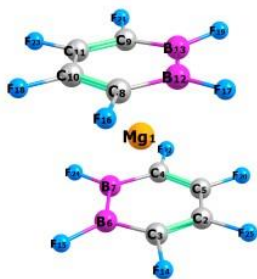

E (B3LYP/6-311++G(d,p)) = -1803.29001814

|                                              |                             |
|----------------------------------------------|-----------------------------|
| Zero-point correction=                       | 0.092856 (Hartree/Particle) |
| Thermal correction to Energy=                | 0.117704                    |
| Thermal correction to Enthalpy=              | 0.118649                    |
| Thermal correction to Gibbs Free Energy=     | 0.035796                    |
| Sum of electronic and zero-point Energies=   | -1803.197162                |
| Sum of electronic and thermal Energies=      | -1803.172314                |
| Sum of electronic and thermal Enthalpies=    | -1803.171370                |
| Sum of electronic and thermal Free Energies= | -1803.254222                |

Charge = -2 Multiplicity = 1

|    |             |             |             |
|----|-------------|-------------|-------------|
| Mg | -0.00001000 | 0.00008700  | 0.00000500  |
| C  | 2.62255400  | 0.69506100  | -0.59881900 |
| C  | 2.09754000  | 1.44715200  | 0.47407000  |
| C  | 2.09692600  | -1.44712500 | 0.47494800  |
| C  | 2.62225300  | -0.69592400 | -0.59840800 |
| B  | 1.58415800  | 0.82819200  | 1.75945200  |
| B  | 1.58384500  | -0.82716500 | 1.75996900  |
| C  | -2.09753800 | 1.44715600  | -0.47407200 |
| C  | -2.09692600 | -1.44712800 | -0.47495000 |
| C  | -2.62254600 | 0.69506300  | 0.59882100  |
| C  | -2.62224700 | -0.69592500 | 0.59841000  |
| B  | -1.58416700 | 0.82819300  | -1.75945800 |
| B  | -1.58385500 | -0.82716300 | -1.75997500 |
| F  | 2.22249700  | 2.82028200  | 0.31057300  |
| F  | 1.21998000  | 1.67152400  | 2.81407900  |
| F  | -2.22248500 | 2.82028600  | -0.31056900 |
| F  | -1.21999100 | 1.67152500  | -2.81408500 |
| F  | -3.09574800 | 1.33822400  | 1.70948200  |
| F  | -1.21939900 | -1.66973500 | -2.81513800 |
| F  | 3.09518900  | -1.33996100 | -1.70867400 |
| F  | -2.22134000 | -2.82041000 | -0.31231000 |
| F  | 2.22134800  | -2.82040700 | 0.31231100  |
| F  | -3.09518000 | -1.33996100 | 1.70867700  |
| F  | 1.21938500  | -1.66973700 | 2.81513100  |

F 3.09575900 1.33822300 -1.70947700

[Mg(B<sub>2</sub>C<sub>4</sub>F<sub>6</sub>)<sub>2</sub>]<sup>2-</sup>-p-1

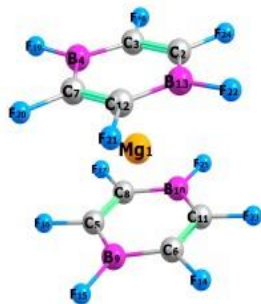

E (B3LYP/6-311++G(d,p)) = -1803.33858226

|                                              |                             |
|----------------------------------------------|-----------------------------|
| Zero-point correction=                       | 0.093490 (Hartree/Particle) |
| Thermal correction to Energy=                | 0.117888                    |
| Thermal correction to Enthalpy=              | 0.118832                    |
| Thermal correction to Gibbs Free Energy=     | 0.038461                    |
| Sum of electronic and zero-point Energies=   | -1803.245093                |
| Sum of electronic and thermal Energies=      | -1803.220695                |
| Sum of electronic and thermal Enthalpies=    | -1803.219750                |
| Sum of electronic and thermal Free Energies= | -1803.300122                |

Charge = -2 Multiplicity = 1

|    |             |             |             |
|----|-------------|-------------|-------------|
| Mg | 0.00000000  | 0.00001500  | 0.00000100  |
| C  | 2.01229200  | -0.32395700 | 1.41053600  |
| C  | 2.01225600  | -1.37139300 | 0.46237000  |
| B  | 2.06130400  | -1.13596400 | -1.02824000 |
| C  | -2.01226200 | -0.46241100 | -1.37137900 |
| C  | -2.01232600 | 1.41054000  | 0.32383400  |
| C  | 2.01235800  | 0.32392800  | -1.41048100 |
| C  | -2.01232100 | -1.41051500 | -0.32388800 |
| B  | -2.06127800 | 1.02821400  | -1.13603700 |
| B  | -2.06132700 | -1.02818900 | 1.13598100  |
| C  | -2.01231400 | 0.46243500  | 1.37132300  |
| C  | 2.01231900  | 1.37136500  | -0.46231700 |
| B  | 2.06130100  | 1.13593300  | 1.02829500  |
| F  | -2.01024100 | 2.74177300  | 0.70307800  |
| F  | -2.12355600 | 1.95843600  | -2.16375100 |
| F  | -2.01009100 | -0.97202100 | -2.65835800 |
| F  | -2.01022600 | -2.74174700 | -0.70313300 |
| F  | 2.01007800  | -2.65840100 | 0.97190600  |
| F  | 2.12360100  | -2.16362400 | -1.95851800 |

|   |             |             |             |
|---|-------------|-------------|-------------|
| F | 2.01029900  | 0.70325100  | -2.74169200 |
| F | 2.01020300  | 2.65837400  | -0.97185100 |
| F | 2.12359900  | 2.16359400  | 1.95858000  |
| F | -2.01019100 | 0.97204600  | 2.65830200  |
| F | 2.01017100  | -0.70328000 | 2.74174600  |
| F | -2.12364900 | -1.95841100 | 2.16369100  |

[Mg(B<sub>2</sub>C<sub>4</sub>Cl<sub>6</sub>)<sub>2</sub>]<sup>2-</sup>-m-1

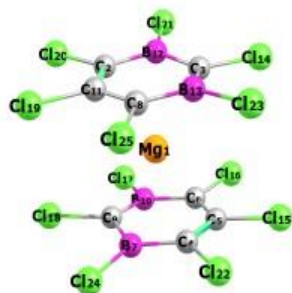

E (B3LYP/6-311++G(d,p)) = -6127.66966802

|                                              |                             |
|----------------------------------------------|-----------------------------|
| Zero-point correction=                       | 0.078517 (Hartree/Particle) |
| Thermal correction to Energy=                | 0.107125                    |
| Thermal correction to Enthalpy=              | 0.108069                    |
| Thermal correction to Gibbs Free Energy=     | 0.014357                    |
| Sum of electronic and zero-point Energies=   | -6127.591151                |
| Sum of electronic and thermal Energies=      | -6127.562543                |
| Sum of electronic and thermal Enthalpies=    | -6127.561599                |
| Sum of electronic and thermal Free Energies= | -6127.655311                |

Charge = -2 Multiplicity = 1

|    |             |             |             |
|----|-------------|-------------|-------------|
| Mg | -0.00032200 | 0.09668500  | -0.00025000 |
| C  | -1.93584300 | 1.01426500  | 1.25882000  |
| C  | 0.30643600  | 0.36917500  | 2.32327700  |
| C  | 1.36523600  | -1.37817900 | -1.45553400 |
| C  | 2.24233900  | -0.34583800 | -1.05721900 |
| C  | 1.93185500  | 1.01703800  | -1.26163700 |
| B  | 0.07184900  | -1.09016100 | -2.20221000 |
| C  | -1.36006100 | -1.37820300 | 1.45979000  |
| C  | -0.30763400 | 0.36023900  | -2.32476100 |
| B  | 0.67420000  | 1.45218100  | -1.99592900 |
| C  | -2.24119000 | -0.35038900 | 1.05859200  |
| B  | -0.67958500 | 1.45637700  | 1.99134000  |
| B  | -0.06763400 | -1.08302300 | 2.20534200  |
| Cl | 1.86945100  | 0.80914000  | 3.07791100  |
| Cl | 3.74094500  | -0.76856600 | -0.22871300 |



|    |             |             |             |
|----|-------------|-------------|-------------|
| Cl | 3.08345800  | 2.24586800  | -0.70509400 |
| Cl | 0.35464400  | 3.20626600  | -2.33698700 |
| Cl | -1.87207800 | 0.79199800  | -3.08118100 |
| Cl | -3.73839800 | -0.78132200 | 0.23177400  |
| Cl | -3.09226700 | 2.23703400  | 0.69893400  |
| Cl | -0.36651600 | 3.21267900  | 2.32699900  |
| Cl | 1.82379900  | -3.05961400 | -1.13131900 |
| Cl | 0.99142500  | -2.42924800 | 2.80309600  |
| Cl | -0.98195700 | -2.44223800 | -2.79605500 |
| Cl | -1.81233600 | -3.06233500 | 1.14077100  |

[Mg(B<sub>2</sub>C<sub>4</sub>Cl<sub>6</sub>)<sub>2</sub>]<sup>2-</sup>-m-2

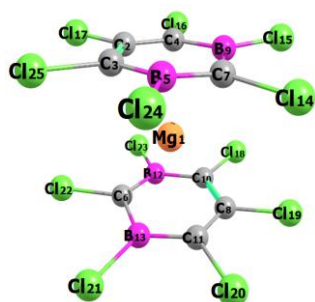

E (B3LYP/6-311++G(d,p)) = -6127.66966802

|                                              |                             |
|----------------------------------------------|-----------------------------|
| Zero-point correction=                       | 0.078517 (Hartree/Particle) |
| Thermal correction to Energy=                | 0.107125                    |
| Thermal correction to Enthalpy=              | 0.108069                    |
| Thermal correction to Gibbs Free Energy=     | 0.014357                    |
| Sum of electronic and zero-point Energies=   | -6127.591151                |
| Sum of electronic and thermal Energies=      | -6127.562543                |
| Sum of electronic and thermal Enthalpies=    | -6127.561599                |
| Sum of electronic and thermal Free Energies= | -6127.655311                |

Charge = -2 Multiplicity = 1

|    |             |             |             |
|----|-------------|-------------|-------------|
| Mg | 0.00031600  | 0.09669800  | -0.00024600 |
| C  | -2.24232400 | -0.34590100 | -1.05722600 |
| C  | -1.93190500 | 1.01699500  | -1.26160400 |
| C  | -1.36517000 | -1.37818800 | -1.45556800 |
| B  | -0.67427300 | 1.45221900  | -1.99588700 |
| C  | -0.30643400 | 0.36913300  | 2.32329300  |
| C  | 0.30761200  | 0.36033500  | -2.32475500 |
| C  | 2.24119400  | -0.35037900 | 1.05857900  |
| B  | -0.07179800 | -1.09008700 | -2.20224000 |
| C  | 1.36007700  | -1.37821000 | 1.45975900  |
| C  | 1.93583100  | 1.01426800  | 1.25883100  |

|    |             |             |             |
|----|-------------|-------------|-------------|
| B  | 0.06765000  | -1.08305900 | 2.20532300  |
| B  | 0.67957200  | 1.45635200  | 1.99136800  |
| Cl | 1.87202800  | 0.79219100  | -3.08117900 |
| Cl | 0.98207200  | -2.44209500 | -2.79612200 |
| Cl | -1.82365100 | -3.05965400 | -1.13140000 |
| Cl | -3.74091600 | -0.76872600 | -0.22874200 |
| Cl | 1.81237000  | -3.06233000 | 1.14070700  |
| Cl | 3.73840900  | -0.78127900 | 0.23175800  |
| Cl | 3.09223600  | 2.23706200  | 0.69896100  |
| Cl | 0.36648500  | 3.21264500  | 2.32706000  |
| Cl | -1.86944300 | 0.80906700  | 3.07795700  |
| Cl | -0.99139100 | -2.42930700 | 2.80305400  |
| Cl | -0.35480000 | 3.20632900  | -2.33689500 |
| Cl | -3.08356600 | 2.24575500  | -0.70502400 |

[Mg(B<sub>2</sub>C<sub>4</sub>Cl<sub>6</sub>)<sub>2</sub>]<sup>2-</sup>-m-3

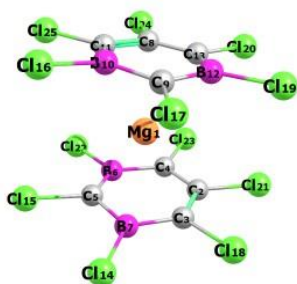

E (B3LYP/6-311++G(d,p)) = -6127.66937251

|                                              |                             |
|----------------------------------------------|-----------------------------|
| Zero-point correction=                       | 0.078489 (Hartree/Particle) |
| Thermal correction to Energy=                | 0.107087                    |
| Thermal correction to Enthalpy=              | 0.108031                    |
| Thermal correction to Gibbs Free Energy=     | 0.015024                    |
| Sum of electronic and zero-point Energies=   | -6127.590884                |
| Sum of electronic and thermal Energies=      | -6127.562286                |
| Sum of electronic and thermal Enthalpies=    | -6127.561342                |
| Sum of electronic and thermal Free Energies= | -6127.654349                |

Charge = -2 Multiplicity = 1

|    |             |             |            |
|----|-------------|-------------|------------|
| Mg | -0.00007600 | 0.23105200  | 0.00000100 |
| C  | 1.76565700  | -1.04847000 | 1.27271300 |
| C  | 2.20021300  | 0.29038100  | 1.16220000 |
| C  | 0.50747900  | -1.38108300 | 1.82256600 |
| C  | 0.00319100  | 1.10434700  | 2.20308200 |
| B  | -0.41815200 | -0.32565300 | 2.40564300 |
| B  | 1.38324100  | 1.44777000  | 1.71436400 |

|    |             |             |             |
|----|-------------|-------------|-------------|
| C  | -1.76801300 | -1.04620000 | -1.27164000 |
| C  | -0.00063000 | 1.10160700  | -2.20417800 |
| B  | -1.38000100 | 1.44865700  | -1.71614000 |
| C  | -2.19960300 | 0.29374600  | -1.16270100 |
| B  | 0.41758500  | -0.32953600 | -2.40501000 |
| C  | -0.51051300 | -1.38222200 | -1.82093700 |
| Cl | 2.02440000  | 3.14564900  | 1.66622500  |
| Cl | -1.07840600 | 2.41836400  | 2.76050900  |
| Cl | -2.01742300 | 3.14800100  | -1.67013200 |
| Cl | 1.08399000  | 2.41258100  | -2.76286600 |
| Cl | 3.77837100  | 0.61438000  | 0.42014200  |
| Cl | 1.98108300  | -0.80401200 | -3.19484000 |
| Cl | -0.05340200 | -3.09272300 | -1.91712300 |
| Cl | 2.79877700  | -2.33793400 | 0.65675400  |
| Cl | -1.98259800 | -0.79574300 | 3.19625000  |
| Cl | 0.04652800  | -3.09044800 | 1.92067300  |
| Cl | -2.80409800 | -2.33265400 | -0.65435600 |
| Cl | -3.77717200 | 0.62210200  | -0.42129000 |

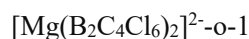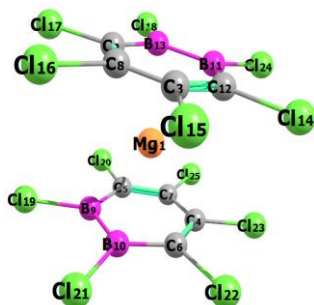

E (B3LYP/6-311++G(d,p)) = -6127.60526467

|                                              |                             |
|----------------------------------------------|-----------------------------|
| Zero-point correction=                       | 0.077957 (Hartree/Particle) |
| Thermal correction to Energy=                | 0.106713                    |
| Thermal correction to Enthalpy=              | 0.107658                    |
| Thermal correction to Gibbs Free Energy=     | 0.013137                    |
| Sum of electronic and zero-point Energies=   | -6127.527308                |
| Sum of electronic and thermal Energies=      | -6127.498551                |
| Sum of electronic and thermal Enthalpies=    | -6127.497607                |
| Sum of electronic and thermal Free Energies= | -6127.592128                |

Charge = -2 Multiplicity = 1

|    |             |             |            |
|----|-------------|-------------|------------|
| Mg | 0.00004800  | 0.15355000  | 0.00003400 |
| C  | -1.62122300 | 1.38689200  | 1.37916200 |
| C  | -1.99756700 | -1.03618700 | 1.02530600 |

|    |             |             |             |
|----|-------------|-------------|-------------|
| C  | 1.99749600  | -1.03628300 | -1.02536100 |
| C  | 1.62132300  | 1.38683300  | -1.37911700 |
| C  | 0.81173700  | -1.38817400 | -1.73962000 |
| C  | 2.38896000  | 0.30375000  | -0.85281600 |
| C  | -2.38892700 | 0.30388400  | 0.85280400  |
| B  | 0.39715700  | 1.18084600  | -2.22744300 |
| B  | -0.05747200 | -0.37278100 | -2.42684800 |
| B  | 0.05740600  | -0.37288500 | 2.42687100  |
| C  | -0.81185000 | -1.38819900 | 1.73957500  |
| B  | -0.39709700 | 1.18078100  | 2.22751500  |
| Cl | -0.43646800 | -3.12338400 | 1.88273700  |
| Cl | -2.97479200 | -2.30130200 | 0.28752400  |
| Cl | -3.83544900 | 0.64334100  | -0.09327000 |
| Cl | -2.22263400 | 3.03502500  | 1.06846400  |
| Cl | 0.50295600  | 2.60491700  | 2.93626300  |
| Cl | -0.50279100 | 2.60508400  | -2.93611700 |
| Cl | 2.22287500  | 3.03490900  | -1.06838400 |
| Cl | -1.52785800 | -0.89115400 | -3.38157400 |
| Cl | 0.43623600  | -3.12332600 | -1.88286200 |
| Cl | 2.97464100  | -2.30150100 | -0.28764800 |
| Cl | 1.52773600  | -0.89140900 | 3.38160500  |
| Cl | 3.83553200  | 0.64306500  | 0.09323400  |

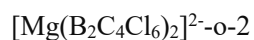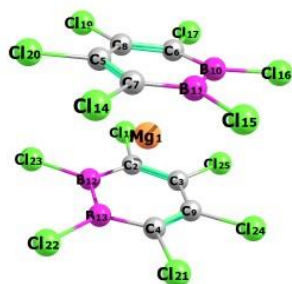

E (B3LYP/6-311++G(d,p)) = -6127.60526482

|                                              |                             |
|----------------------------------------------|-----------------------------|
| Zero-point correction=                       | 0.077952 (Hartree/Particle) |
| Thermal correction to Energy=                | 0.106711                    |
| Thermal correction to Enthalpy=              | 0.107655                    |
| Thermal correction to Gibbs Free Energy=     | 0.013080                    |
| Sum of electronic and zero-point Energies=   | -6127.527313                |
| Sum of electronic and thermal Energies=      | -6127.498554                |
| Sum of electronic and thermal Enthalpies=    | -6127.497609                |
| Sum of electronic and thermal Free Energies= | -6127.592185                |

Charge = -2 Multiplicity = 1

|    |             |             |             |
|----|-------------|-------------|-------------|
| Mg | 0.00007000  | 0.15437400  | -0.00004900 |
| C  | 0.81099100  | -1.38755800 | 1.73961000  |
| C  | 1.99682800  | -1.03738800 | 1.02464100  |
| C  | 1.62384700  | 1.38629900  | 1.37777600  |
| C  | -2.38984000 | 0.30203800  | -0.85140000 |
| C  | -0.81100200 | -1.38764000 | -1.73957300 |
| C  | -1.62384800 | 1.38622600  | -1.37779900 |
| C  | -1.99679600 | -1.03744900 | -1.02454300 |
| C  | 2.38987800  | 0.30209300  | 0.85147100  |
| B  | 0.05656000  | -0.37098400 | -2.42702000 |
| B  | -0.39989600 | 1.18203900  | -2.22687800 |
| B  | -0.05662500 | -0.37087900 | 2.42695200  |
| B  | 0.39983900  | 1.18213600  | 2.22677100  |
| Cl | -2.22737300 | 3.03347700  | -1.06641700 |
| Cl | 0.49779800  | 2.60758400  | -2.93579900 |
| Cl | 1.52702400  | -0.88723000 | -3.38278100 |
| Cl | -0.43334700 | -3.12227800 | -1.88346400 |
| Cl | 0.43334100  | -3.12219400 | 1.88353900  |
| Cl | -2.97197800 | -2.30410700 | -0.28671300 |
| Cl | -3.83635900 | 0.63927000  | 0.09547900  |
| Cl | 2.22739400  | 3.03354000  | 1.06638100  |
| Cl | -0.49791800 | 2.60770600  | 2.93555600  |
| Cl | -1.52713900 | -0.88709300 | 3.38264600  |
| Cl | 3.83646300  | 0.63929100  | -0.09532300 |
| Cl | 2.97206100  | -2.30407000 | 0.28691700  |

[Mg(B<sub>2</sub>C<sub>4</sub>Cl<sub>6</sub>)<sub>2</sub>]<sup>2-</sup>-p-1

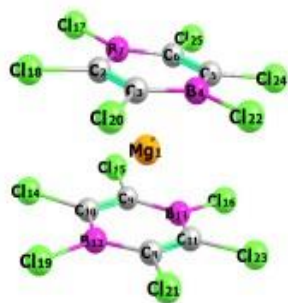

E (B3LYP/6-311++G(d,p)) = -6127.66016417

|                                          |                             |
|------------------------------------------|-----------------------------|
| Zero-point correction=                   | 0.078354 (Hartree/Particle) |
| Thermal correction to Energy=            | 0.106896                    |
| Thermal correction to Enthalpy=          | 0.107840                    |
| Thermal correction to Gibbs Free Energy= | 0.014789                    |

|                                              |              |
|----------------------------------------------|--------------|
| Sum of electronic and zero-point Energies=   | -6127.581810 |
| Sum of electronic and thermal Energies=      | -6127.553268 |
| Sum of electronic and thermal Enthalpies=    | -6127.552324 |
| Sum of electronic and thermal Free Energies= | -6127.645375 |

Charge = -2 Multiplicity = 1

|    |             |             |             |
|----|-------------|-------------|-------------|
| Mg | 0.00000000  | 0.00000300  | 0.00002700  |
| C  | -1.95346800 | 1.40449100  | -0.40504100 |
| C  | -1.95346400 | 0.40195900  | -1.40560100 |
| B  | -2.01199200 | -1.06793700 | -1.06565800 |
| C  | -1.95318200 | -1.40497700 | 0.40489700  |
| C  | -1.95347900 | -0.40244400 | 1.40545800  |
| B  | -2.01231300 | 1.06743900  | 1.06551100  |
| C  | 1.95341400  | -0.40473500 | -1.40466300 |
| C  | 1.95323600  | 0.40522000  | 1.40480100  |
| C  | 1.95330200  | 1.40577400  | 0.40226200  |
| C  | 1.95364200  | -1.40528900 | -0.40212400 |
| B  | 2.01206600  | 1.06582700  | -1.06762300 |
| B  | 2.01224000  | -1.06533000 | 1.06776500  |
| Cl | 1.89679300  | 3.11285600  | 0.88301300  |
| Cl | 1.89651300  | 0.88930600  | 3.11093500  |
| Cl | 2.06471200  | -2.34873900 | 2.35370200  |
| Cl | -2.06487300 | 2.35336100  | 2.34893200  |
| Cl | -1.89702300 | 3.11063600  | -0.88912100 |
| Cl | 2.06433400  | 2.34924900  | -2.35355700 |
| Cl | -1.89715400 | 0.88272700  | -3.11268400 |
| Cl | 1.89691700  | -0.88883500 | -3.11080000 |
| Cl | -2.06417300 | -2.35387100 | -2.34908300 |
| Cl | 1.89753400  | -3.11238400 | -0.88287700 |
| Cl | -1.89640800 | -3.11110900 | 0.88898300  |
| Cl | -1.89717200 | -0.88319900 | 3.11254600  |

[Ca(B<sub>2</sub>C<sub>4</sub>H<sub>6</sub>)<sub>2</sub>]<sup>2-</sup>-m-1

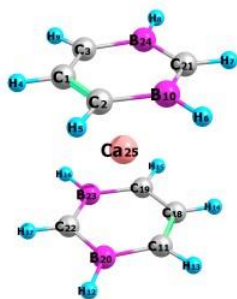

E (B3LYP/6-311++G(d,p)) = -1089.36618591

|                                              |                             |
|----------------------------------------------|-----------------------------|
| Zero-point correction=                       | 0.179690 (Hartree/Particle) |
| Thermal correction to Energy=                | 0.192722                    |
| Thermal correction to Enthalpy=              | 0.193666                    |
| Thermal correction to Gibbs Free Energy=     | 0.138306                    |
| Sum of electronic and zero-point Energies=   | -1089.186496                |
| Sum of electronic and thermal Energies=      | -1089.173464                |
| Sum of electronic and thermal Enthalpies=    | -1089.172520                |
| Sum of electronic and thermal Free Energies= | -1089.227880                |

Charge = -2 Multiplicity = 1

|    |             |             |             |
|----|-------------|-------------|-------------|
| C  | 2.32028200  | 1.41624900  | -0.00016400 |
| C  | 2.31721800  | 0.74565300  | 1.24333800  |
| C  | 2.31718100  | 0.74537100  | -1.24351900 |
| H  | 2.28638600  | 2.51216300  | -0.00029000 |
| H  | 2.29593400  | 1.38280500  | 2.13113000  |
| H  | 2.39888400  | -1.33379200 | 2.40610200  |
| H  | 2.31478700  | -2.63257200 | 0.00029100  |
| H  | 2.39881200  | -1.33433600 | -2.40581800 |
| H  | 2.29587300  | 1.38232800  | -2.13145100 |
| B  | 2.38068000  | -0.78250500 | 1.31595200  |
| C  | -2.31721800 | -0.74565000 | 1.24333900  |
| H  | -2.39888500 | 1.33379700  | 2.40609900  |
| H  | -2.29593400 | -1.38280200 | 2.13113100  |
| H  | -2.28638600 | -2.51216300 | -0.00028600 |
| H  | -2.29587200 | -1.38233200 | -2.13144900 |
| H  | -2.39881100 | 1.33433100  | -2.40582100 |
| H  | -2.31478700 | 2.63257200  | 0.00028600  |
| C  | -2.32028200 | -1.41624900 | -0.00016200 |
| C  | -2.31718000 | -0.74537400 | -1.24351900 |
| B  | -2.38068000 | 0.78250700  | 1.31595000  |
| C  | 2.32441400  | -1.53531400 | 0.00016700  |
| C  | -2.32441400 | 1.53531400  | 0.00016300  |
| B  | -2.38064000 | 0.78280000  | -1.31579200 |
| B  | 2.38064000  | -0.78280200 | -1.31579000 |
| Ca | 0.00000000  | 0.00000000  | 0.00003100  |

[Ca(B<sub>2</sub>C<sub>4</sub>H<sub>6</sub>)<sub>2</sub>]<sup>2-</sup>-m-2

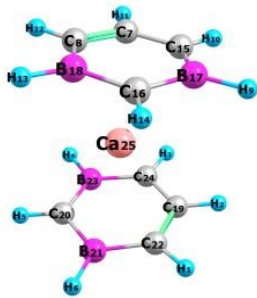

E (B3LYP/6-311++G(d,p)) = -1089.36637831

|                                              |                             |
|----------------------------------------------|-----------------------------|
| Zero-point correction=                       | 0.179768 (Hartree/Particle) |
| Thermal correction to Energy=                | 0.192756                    |
| Thermal correction to Enthalpy=              | 0.193700                    |
| Thermal correction to Gibbs Free Energy=     | 0.139886                    |
| Sum of electronic and zero-point Energies=   | -1089.186610                |
| Sum of electronic and thermal Energies=      | -1089.173623                |
| Sum of electronic and thermal Enthalpies=    | -1089.172678                |
| Sum of electronic and thermal Free Energies= | -1089.226492                |

Charge = -2 Multiplicity = 1

|   |             |             |             |
|---|-------------|-------------|-------------|
| H | 2.32436800  | -2.48755600 | -0.49395800 |
| H | 2.11326100  | -1.77928900 | 1.80166600  |
| H | 2.06988600  | 0.52534500  | 2.50912300  |
| H | 2.32604200  | 2.64126900  | 0.79986300  |
| H | 2.46858400  | 1.85868900  | -1.81813900 |
| H | 2.61396900  | -0.76079800 | -2.59197600 |
| C | -2.21964200 | 1.00469300  | 1.03342700  |
| C | -2.33395800 | 1.40922000  | -0.31558500 |
| H | -2.32608400 | -2.64121100 | 0.80004500  |
| H | -2.06993000 | -0.52517100 | 2.50914700  |
| H | -2.11325700 | 1.77941000  | 1.80153300  |
| H | -2.32436000 | 2.48751800  | -0.49414100 |
| H | -2.61393700 | 0.76060700  | -2.59203500 |
| H | -2.46856700 | -1.85881200 | -1.81801800 |
| C | -2.18711200 | -0.34852500 | 1.43684300  |
| C | -2.41156000 | -1.08296200 | -1.04444000 |
| B | -2.34101800 | -1.48029500 | 0.41782700  |
| B | -2.49862800 | 0.37974400  | -1.43672200 |
| C | 2.21963900  | -1.00462000 | 1.03350900  |
| C | 2.41156800  | 1.08288400  | -1.04451600 |
| B | 2.49864900  | -0.37985300 | -1.43669200 |
| C | 2.33396800  | -1.40924600 | -0.31547500 |
| B | 2.34099600  | 1.48032700  | 0.41773000  |
| C | 2.18708900  | 0.34862800  | 1.43683200  |



Ca 0.00000400 -0.00000200 -0.17737000

[Ca(B<sub>2</sub>C<sub>4</sub>H<sub>6</sub>)<sub>2</sub>]<sup>2-</sup>-o-1

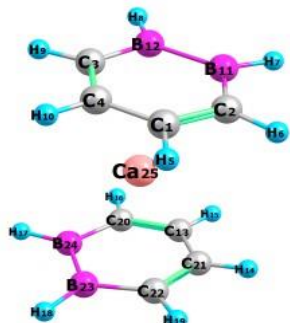

E (B3LYP/6-311++G(d,p)) = -1089.31299000

|                                              |                             |
|----------------------------------------------|-----------------------------|
| Zero-point correction=                       | 0.179730 (Hartree/Particle) |
| Thermal correction to Energy=                | 0.192766                    |
| Thermal correction to Enthalpy=              | 0.193710                    |
| Thermal correction to Gibbs Free Energy=     | 0.139130                    |
| Sum of electronic and zero-point Energies=   | -1089.133260                |
| Sum of electronic and thermal Energies=      | -1089.120224                |
| Sum of electronic and thermal Enthalpies=    | -1089.119280                |
| Sum of electronic and thermal Free Energies= | -1089.173860                |

Charge = -2 Multiplicity = 1

|   |             |             |             |
|---|-------------|-------------|-------------|
| C | -2.19404600 | -1.17261700 | -0.79849700 |
| C | -2.21284100 | -1.36359600 | 0.61302500  |
| C | -2.42574400 | 1.29419000  | -0.63199600 |
| C | -2.29607900 | 0.09691100  | -1.39359400 |
| H | -2.07415900 | -2.03104400 | -1.46226500 |
| H | -2.10271100 | -2.40776500 | 0.92958200  |
| H | -2.38613100 | -0.48321100 | 2.78446100  |
| H | -2.61320300 | 2.37425300  | 1.44627700  |
| H | -2.47570300 | 2.20989800  | -1.23315300 |
| H | -2.25094300 | 0.14689400  | -2.48333200 |
| B | -2.38612700 | -0.21428000 | 1.59048200  |
| B | -2.50650700 | 1.29212300  | 0.88503900  |
| C | 2.29608300  | 0.09691400  | 1.39359200  |
| H | 2.07416400  | -2.03103900 | 1.46226800  |
| H | 2.25095000  | 0.14690000  | 2.48333000  |
| H | 2.47570600  | 2.20990100  | 1.23314600  |
| H | 2.61319800  | 2.37424900  | -1.44628400 |
| H | 2.38612400  | -0.48321700 | -2.78446000 |
| H | 2.10271000  | -2.40776600 | -0.92957600 |

|    |             |             |             |
|----|-------------|-------------|-------------|
| C  | 2.42574500  | 1.29419100  | 0.63199200  |
| C  | 2.19404900  | -1.17261300 | 0.79849700  |
| C  | 2.21284000  | -1.36359600 | -0.61302200 |
| B  | 2.38612200  | -0.21428500 | -1.59048100 |
| B  | 2.50650400  | 1.29212100  | -0.88504400 |
| Ca | -0.00000100 | 0.16724200  | 0.00000200  |

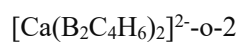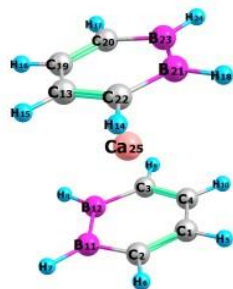

E (B3LYP/6-311++G(d,p)) = -1089.31292597

|                                              |                             |
|----------------------------------------------|-----------------------------|
| Zero-point correction=                       | 0.179703 (Hartree/Particle) |
| Thermal correction to Energy=                | 0.192732                    |
| Thermal correction to Enthalpy=              | 0.193676                    |
| Thermal correction to Gibbs Free Energy=     | 0.139176                    |
| Sum of electronic and zero-point Energies=   | -1089.133223                |
| Sum of electronic and thermal Energies=      | -1089.120194                |
| Sum of electronic and thermal Enthalpies=    | -1089.119250                |
| Sum of electronic and thermal Free Energies= | -1089.173750                |

Charge = -2 Multiplicity = 1

|   |             |             |             |
|---|-------------|-------------|-------------|
| C | 2.27871200  | -0.82177800 | 1.13876500  |
| C | 2.30175600  | -1.47227500 | -0.12882600 |
| C | 2.35428000  | 1.45646500  | 0.15260400  |
| C | 2.30386400  | 0.57766400  | 1.27335500  |
| H | 2.21856800  | -1.41469900 | 2.05368500  |
| H | 2.25669700  | -2.56684800 | -0.07619200 |
| H | 2.40942600  | -1.36052100 | -2.47346100 |
| H | 2.46463100  | 1.78852300  | -2.17118500 |
| H | 2.34889100  | 2.52189900  | 0.41267500  |
| H | 2.26266500  | 0.98719300  | 2.28480200  |
| B | 2.39790300  | -0.70792700 | -1.43803500 |
| B | 2.42757800  | 0.95191600  | -1.27854800 |
| C | -2.27869700 | -0.82178200 | -1.13876700 |
| H | -2.25669800 | -2.56684800 | 0.07619500  |
| H | -2.21853800 | -1.41470500 | -2.05368400 |

|    |             |             |             |
|----|-------------|-------------|-------------|
| H  | -2.26263300 | 0.98718700  | -2.28480700 |
| H  | -2.34888800 | 2.52189800  | -0.41268600 |
| H  | -2.40945800 | -1.36051400 | 2.47345900  |
| C  | -2.30384800 | 0.57766000  | -1.27336100 |
| C  | -2.35427900 | 1.45646400  | -0.15261300 |
| B  | -2.39792200 | -0.70792300 | 1.43803200  |
| C  | -2.30175800 | -1.47227500 | 0.12882500  |
| B  | -2.42759600 | 0.95192000  | 1.27853900  |
| H  | -2.46466200 | 1.78853000  | 2.17117300  |
| Ca | 0.00000000  | 0.03840600  | 0.00000900  |

[Ca(B<sub>2</sub>C<sub>4</sub>H<sub>6</sub>)<sub>2</sub>]<sup>2-</sup>-o-3

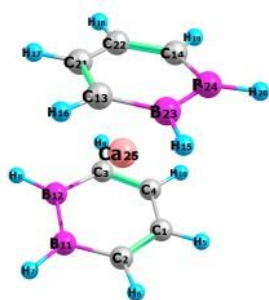

E (B3LYP/6-311++G(d,p)) = -1089.31299001

|                                              |                             |
|----------------------------------------------|-----------------------------|
| Zero-point correction=                       | 0.179730 (Hartree/Particle) |
| Thermal correction to Energy=                | 0.192765                    |
| Thermal correction to Enthalpy=              | 0.193709                    |
| Thermal correction to Gibbs Free Energy=     | 0.139153                    |
| Sum of electronic and zero-point Energies=   | -1089.133260                |
| Sum of electronic and thermal Energies=      | -1089.120225                |
| Sum of electronic and thermal Enthalpies=    | -1089.119281                |
| Sum of electronic and thermal Free Energies= | -1089.173837                |

Charge = -2 Multiplicity = 1

|   |             |             |             |
|---|-------------|-------------|-------------|
| C | -2.29627200 | 0.09904900  | 1.39341300  |
| C | -2.42553100 | 1.29524600  | 0.63004200  |
| C | -2.21316800 | -1.36443100 | -0.61105100 |
| C | -2.19449500 | -1.17138300 | 0.80019400  |
| H | -2.25127600 | 0.15062300  | 2.48308400  |
| H | -2.47533000 | 2.21185100  | 1.22984400  |
| H | -2.61244200 | 2.37230600  | -1.44984900 |
| H | -2.38595700 | -0.48718800 | -2.78380700 |
| H | -2.10327900 | -2.40909400 | -0.92606400 |
| H | -2.07493100 | -2.02886800 | 1.46523800  |
| B | -2.50610200 | 1.29097100  | -0.88700500 |

|    |             |             |             |
|----|-------------|-------------|-------------|
| B  | -2.38602800 | -0.21650500 | -1.59022200 |
| C  | 2.42553200  | 1.29524900  | -0.63003500 |
| C  | 2.21316700  | -1.36443600 | 0.61104000  |
| H  | 2.61245300  | 2.37229300  | 1.44986300  |
| H  | 2.47533100  | 2.21185900  | -1.22983100 |
| H  | 2.25127000  | 0.15063900  | -2.48308400 |
| H  | 2.07491900  | -2.02885800 | -1.46525300 |
| H  | 2.10327900  | -2.40910200 | 0.92604500  |
| H  | 2.38596700  | -0.48721000 | 2.78380100  |
| C  | 2.29626800  | 0.09905700  | -1.39341400 |
| C  | 2.19449000  | -1.17137800 | -0.80020400 |
| B  | 2.50610800  | 1.29096300  | 0.88701200  |
| B  | 2.38603400  | -0.21651800 | 1.59021800  |
| Ca | 0.00000000  | 0.16671800  | 0.00000500  |

[Ca(B<sub>2</sub>C<sub>4</sub>H<sub>6</sub>)<sub>2</sub>]<sup>2-</sup>-p-1

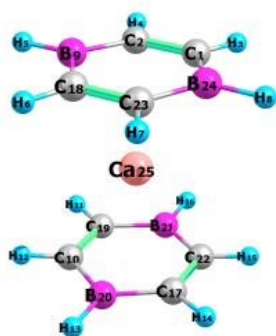

E (B3LYP/6-311++G(d,p)) = -1089.35603653

|                                              |                             |
|----------------------------------------------|-----------------------------|
| Zero-point correction=                       | 0.179677 (Hartree/Particle) |
| Thermal correction to Energy=                | 0.192682                    |
| Thermal correction to Enthalpy=              | 0.193626                    |
| Thermal correction to Gibbs Free Energy=     | 0.139433                    |
| Sum of electronic and zero-point Energies=   | -1089.176360                |
| Sum of electronic and thermal Energies=      | -1089.163354                |
| Sum of electronic and thermal Enthalpies=    | -1089.162410                |
| Sum of electronic and thermal Free Energies= | -1089.216604                |

Charge = -2 Multiplicity = 1

|   |            |             |             |
|---|------------|-------------|-------------|
| C | 2.35156600 | -0.43803300 | 1.40479700  |
| C | 2.35156200 | -1.42109000 | 0.38187800  |
| H | 2.31792800 | -0.79998600 | 2.44011400  |
| H | 2.31800400 | -2.46998000 | 0.70237700  |
| H | 2.37591800 | -1.89204000 | -1.96881500 |
| H | 2.31794000 | 0.79998700  | -2.44011200 |

|    |             |             |             |
|----|-------------|-------------|-------------|
| H  | 2.31804100  | 2.46997800  | -0.70237800 |
| H  | 2.37591800  | 1.89204200  | 1.96881300  |
| B  | 2.38708300  | -1.04937000 | -1.09190100 |
| C  | -2.35156600 | -0.38195400 | -1.42106800 |
| H  | -2.31793000 | -2.44015500 | -0.79986000 |
| H  | -2.31801800 | -0.70250900 | -2.46994100 |
| H  | -2.37593200 | 1.96871200  | -1.89214700 |
| H  | -2.31793800 | 2.44015600  | 0.79985400  |
| H  | -2.31801600 | 0.70251000  | 2.46994100  |
| H  | -2.37590100 | -1.96871700 | 1.89214400  |
| C  | -2.35157400 | 1.40482000  | 0.43795700  |
| C  | 2.35157100  | 0.43803200  | -1.40479600 |
| C  | -2.35156500 | -1.40482000 | -0.43795800 |
| B  | -2.38709000 | 1.09184500  | -1.04942800 |
| B  | -2.38708100 | -1.09184600 | 1.04942800  |
| C  | -2.35156900 | 0.38195300  | 1.42106900  |
| C  | 2.35157400  | 1.42108800  | -0.38187800 |
| B  | 2.38708700  | 1.04936900  | 1.09190100  |
| Ca | 0.00000000  | 0.00000300  | 0.00000000  |

[Ca(B<sub>2</sub>C<sub>4</sub>F<sub>6</sub>)<sub>2</sub>]<sup>2-</sup>-m-1

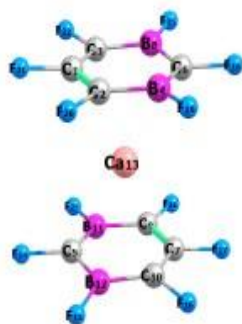

E (B3LYP/6-311++G(d,p)) = -2280.89428093

|                                              |                             |
|----------------------------------------------|-----------------------------|
| Zero-point correction=                       | 0.092825 (Hartree/Particle) |
| Thermal correction to Energy=                | 0.117688                    |
| Thermal correction to Enthalpy=              | 0.118632                    |
| Thermal correction to Gibbs Free Energy=     | 0.035167                    |
| Sum of electronic and zero-point Energies=   | -2280.801456                |
| Sum of electronic and thermal Energies=      | -2280.776593                |
| Sum of electronic and thermal Enthalpies=    | -2280.775649                |
| Sum of electronic and thermal Free Energies= | -2280.859114                |

Charge = -2 Multiplicity = 1

|   |             |            |             |
|---|-------------|------------|-------------|
| C | -2.38705200 | 1.38950800 | -0.00024900 |
|---|-------------|------------|-------------|

|    |             |             |             |
|----|-------------|-------------|-------------|
| C  | -2.35295300 | 0.72037800  | -1.23115800 |
| C  | -2.35299700 | 0.72081300  | 1.23089800  |
| B  | -2.42527100 | -0.79681500 | -1.32051800 |
| C  | 2.34200200  | 1.51342200  | 0.00026100  |
| C  | -2.34200200 | -1.51342200 | 0.00026500  |
| C  | 2.38705300  | -1.38950800 | -0.00024700 |
| B  | -2.42531900 | -0.79634800 | 1.32079200  |
| C  | 2.35299700  | -0.72081100 | 1.23089800  |
| C  | 2.35295300  | -0.72038000 | -1.23115700 |
| B  | 2.42531900  | 0.79635000  | 1.32079000  |
| B  | 2.42527100  | 0.79681200  | -1.32052100 |
| Ca | 0.00000000  | 0.00000000  | 0.00004200  |
| F  | 2.37321300  | 2.92858200  | 0.00050700  |
| F  | 2.50891600  | 1.42694200  | -2.55351300 |
| F  | 2.41549800  | -1.53413400 | -2.36060500 |
| F  | 2.44211000  | -2.75675800 | -0.00048700 |
| F  | -2.37321400 | -2.92858200 | 0.00051400  |
| F  | -2.50891700 | -1.42694700 | -2.55351000 |
| F  | -2.41549800 | 1.53412900  | -2.36060700 |
| F  | -2.44211000 | 2.75675800  | -0.00049200 |
| F  | -2.41557700 | 1.53496300  | 2.36005700  |
| F  | 2.50900700  | 1.42604900  | 2.55400000  |
| F  | 2.41557800  | -1.53495800 | 2.36006000  |
| F  | -2.50900600 | -1.42604300 | 2.55400400  |

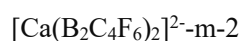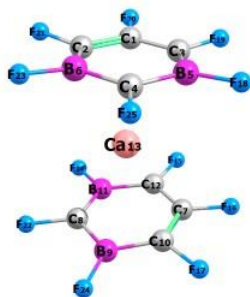

E (B3LYP/6-311++G(d,p)) = -2280.89452659

|                                            |                             |
|--------------------------------------------|-----------------------------|
| Zero-point correction=                     | 0.092862 (Hartree/Particle) |
| Thermal correction to Energy=              | 0.117707                    |
| Thermal correction to Enthalpy=            | 0.118651                    |
| Thermal correction to Gibbs Free Energy=   | 0.036449                    |
| Sum of electronic and zero-point Energies= | -2280.801664                |
| Sum of electronic and thermal Energies=    | -2280.776820                |
| Sum of electronic and thermal Enthalpies=  | -2280.775876                |

Sum of electronic and thermal Free Energies= -2280.858077

Charge = -2 Multiplicity = 1

|    |             |             |             |
|----|-------------|-------------|-------------|
| C  | 2.29875500  | 0.94958900  | -1.03145500 |
| C  | 2.36287700  | 1.39672600  | 0.29564400  |
| C  | 2.24247000  | -0.40766400 | -1.37503300 |
| C  | 2.41920200  | -1.02513800 | 1.09379300  |
| B  | 2.39571800  | -1.50530900 | -0.33236000 |
| B  | 2.52672400  | 0.43072900  | 1.45939200  |
| C  | -2.29884200 | -0.95067600 | -1.03039100 |
| C  | -2.41913500 | 1.02631500  | 1.09279800  |
| B  | -2.52665400 | -0.42917200 | 1.45993300  |
| C  | -2.36289000 | -1.39641000 | 0.29719400  |
| B  | -2.39571300 | 1.50496400  | -0.33386600 |
| C  | -2.24255800 | 0.40621800  | -1.37539600 |
| Ca | -0.00000300 | 0.00003000  | 0.17880200  |
| F  | -2.45217100 | 2.83654000  | -0.71719600 |
| F  | -2.20343600 | 0.67976800  | -2.74043300 |
| F  | -2.27790200 | -1.88212500 | -2.03169300 |
| F  | -2.43457900 | -2.77786900 | 0.46570400  |
| F  | 2.45220800  | -2.83729200 | -0.71425900 |
| F  | 2.20329200  | -0.68263200 | -2.73978400 |
| F  | 2.27773000  | 1.87999200  | -2.03372600 |
| F  | 2.43456500  | 2.77835600  | 0.46269700  |
| F  | -2.52840500 | 1.99009800  | 2.12499100  |
| F  | 2.70243800  | 0.90614700  | 2.75090100  |
| F  | -2.70226500 | -0.90320900 | 2.75196400  |
| F  | 2.52857100  | -1.98782200 | 2.12700500  |

[Ca(B<sub>2</sub>C<sub>4</sub>F<sub>6</sub>)<sub>2</sub>]<sup>2-</sup>-o-1

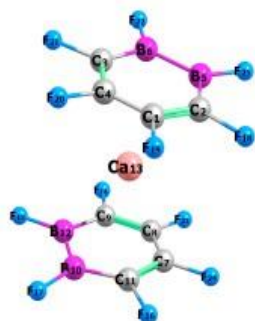

E (B3LYP/6-311++G(d,p)) = -2280.83317162

Zero-point correction=

0.092289 (Hartree/Particle)

Thermal correction to Energy=

0.117263

|                                              |              |
|----------------------------------------------|--------------|
| Thermal correction to Enthalpy=              | 0.118208     |
| Thermal correction to Gibbs Free Energy=     | 0.035016     |
| Sum of electronic and zero-point Energies=   | -2280.740882 |
| Sum of electronic and thermal Energies=      | -2280.715908 |
| Sum of electronic and thermal Enthalpies=    | -2280.714964 |
| Sum of electronic and thermal Free Energies= | -2280.798156 |

Charge = -2 Multiplicity = 1

|    |             |             |             |
|----|-------------|-------------|-------------|
| C  | 2.18363500  | 0.24552500  | 1.35313900  |
| C  | 2.25091100  | -1.10741400 | 0.93896900  |
| C  | 2.45346500  | 1.10136000  | -0.93864000 |
| C  | 2.28039700  | 1.30443700  | 0.45302800  |
| B  | 2.48701800  | -1.52066500 | -0.49107700 |
| B  | 2.60294200  | -0.26269100 | -1.56031700 |
| C  | -2.18388900 | -0.25152000 | 1.35192200  |
| C  | -2.28176700 | -1.30620000 | 0.44717300  |
| C  | -2.45451300 | -1.09693600 | -0.94340300 |
| B  | -2.48549700 | 1.52322300  | -0.48423900 |
| C  | -2.24974700 | 1.10333000  | 0.94387500  |
| B  | -2.60270300 | 0.27003900  | -1.55906900 |
| Ca | 0.00016300  | -0.00040900 | -0.26975500 |
| F  | -2.55772000 | -2.28134500 | -1.67523700 |
| F  | -2.81912300 | 0.36888800  | -2.94146900 |
| F  | -2.16479600 | 2.00821300  | 2.00184800  |
| F  | -2.58724700 | 2.88996400  | -0.77982900 |
| F  | 2.16684800  | -2.01710300 | 1.99290000  |
| F  | 2.08796200  | 0.54301200  | 2.68705900  |
| F  | 2.27189400  | 2.57904200  | 0.95654500  |
| F  | 2.55556900  | 2.28907300  | -1.66521100 |
| F  | 2.81943300  | -0.35521200 | -2.94314300 |
| F  | -2.27454500 | -2.58310500 | 0.94495800  |
| F  | -2.08865000 | -0.55506600 | 2.68451600  |
| F  | 2.59004000  | -2.88601000 | -0.79268800 |

[Ca(B<sub>2</sub>C<sub>4</sub>F<sub>6</sub>)<sub>2</sub>]<sup>2-</sup>-o-2

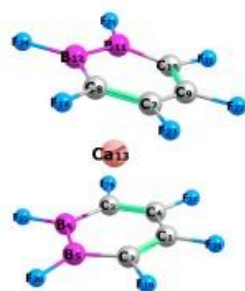



E (B3LYP/6-311++G(d,p)) = -2280.83325262

|                                              |                             |
|----------------------------------------------|-----------------------------|
| Zero-point correction=                       | 0.092328 (Hartree/Particle) |
| Thermal correction to Energy=                | 0.117279                    |
| Thermal correction to Enthalpy=              | 0.118223                    |
| Thermal correction to Gibbs Free Energy=     | 0.035350                    |
| Sum of electronic and zero-point Energies=   | -2280.740924                |
| Sum of electronic and thermal Energies=      | -2280.715974                |
| Sum of electronic and thermal Enthalpies=    | -2280.715030                |
| Sum of electronic and thermal Free Energies= | -2280.797903                |

Charge = -2 Multiplicity = 1

|    |             |             |             |
|----|-------------|-------------|-------------|
| C  | 2.13637100  | 0.32442700  | -1.33167400 |
| C  | 2.28724200  | 1.39281000  | -0.41405400 |
| C  | 2.40026200  | -1.38920100 | 0.41423600  |
| C  | 2.19056800  | -1.00972000 | -0.93440600 |
| B  | 2.56971600  | 1.18750400  | 1.05201600  |
| B  | 2.63307800  | -0.39710100 | 1.52401200  |
| C  | -2.19062100 | 1.00949200  | -0.93451900 |
| C  | -2.40022700 | 1.38930800  | 0.41404500  |
| C  | -2.13645800 | -0.32475500 | -1.33146100 |
| C  | -2.28727600 | -1.39291300 | -0.41356800 |
| B  | -2.56965600 | -1.18724400 | 1.05247200  |
| B  | -2.63298000 | 0.39748100  | 1.52408200  |
| Ca | 0.00000900  | 0.00003400  | 0.33467500  |
| F  | -2.44811900 | 2.77131200  | 0.60139500  |
| F  | 2.87228500  | -0.87633900 | 2.82094700  |
| F  | 2.44817300  | -2.77115900 | 0.60192400  |
| F  | 2.10887200  | -1.97299200 | -1.90535500 |
| F  | 2.00779700  | 0.59160500  | -2.66922800 |
| F  | 2.23216300  | 2.65173000  | -1.01210700 |
| F  | 2.74742000  | 2.31230600  | 1.87070600  |
| F  | -2.23224000 | -2.65198100 | -1.01131300 |
| F  | -2.00797000 | -0.59226400 | -2.66895700 |
| F  | -2.10898200 | 1.97252400  | -1.90571000 |
| F  | -2.87210100 | 0.87704000  | 2.82091500  |
| F  | -2.74731300 | -2.31184300 | 1.87145000  |

[Ca(B<sub>2</sub>C<sub>4</sub>F<sub>6</sub>)<sub>2</sub>]<sup>2-</sup>-o-3

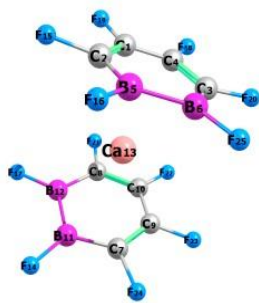

E (B3LYP/6-311++G(d,p)) = -2280.83317590

|                                              |                             |
|----------------------------------------------|-----------------------------|
| Zero-point correction=                       | 0.092288 (Hartree/Particle) |
| Thermal correction to Energy=                | 0.117263                    |
| Thermal correction to Enthalpy=              | 0.118207                    |
| Thermal correction to Gibbs Free Energy=     | 0.034506                    |
| Sum of electronic and zero-point Energies=   | -2280.740888                |
| Sum of electronic and thermal Energies=      | -2280.715913                |
| Sum of electronic and thermal Enthalpies=    | -2280.714969                |
| Sum of electronic and thermal Free Energies= | -2280.798670                |

Charge = -2 Multiplicity = 1

|    |             |             |             |
|----|-------------|-------------|-------------|
| C  | -2.27268500 | -1.28892800 | -0.49388100 |
| C  | -2.45313700 | -1.12953900 | 0.90247500  |
| C  | -2.24797400 | 1.13667900  | -0.90405400 |
| C  | -2.17464800 | -0.20273700 | -1.35947500 |
| B  | -2.60945500 | 0.21460100  | 1.56626500  |
| B  | -2.49213000 | 1.50527900  | 0.53688400  |
| C  | 2.45361200  | 1.12756800  | 0.90479200  |
| C  | 2.24747100  | -1.13491200 | -0.90640300 |
| C  | 2.27323000  | 1.28989100  | -0.49127500 |
| C  | 2.17473500  | 0.20547900  | -1.35910200 |
| B  | 2.60935100  | -0.21803200 | 1.56585900  |
| B  | 2.49147800  | -1.50656100 | 0.53381100  |
| Ca | 0.00001900  | 0.00024400  | 0.28190100  |
| F  | 2.83197300  | -0.27030400 | 2.94994500  |
| F  | -2.55504900 | -2.33963700 | 1.59121800  |
| F  | -2.83211800 | 0.26393600  | 2.95045400  |
| F  | 2.59901900  | -2.86243000 | 0.87425400  |
| F  | -2.07228800 | -0.45843000 | -2.70147600 |
| F  | -2.25868200 | -2.54721000 | -1.03660400 |
| F  | -2.16126700 | 2.07881100  | -1.92883100 |
| F  | 2.16037000  | -2.07491000 | -1.93309000 |
| F  | 2.07249200  | 0.46396200  | -2.70057900 |
| F  | 2.25974000  | 2.54929300  | -1.03144200 |
| F  | 2.55600600  | 2.33623900  | 1.59599200  |

F -2.60022000 2.86042100 0.88009400

[Ca(B<sub>2</sub>C<sub>4</sub>F<sub>6</sub>)<sub>2</sub>]<sup>2-</sup>-o-4

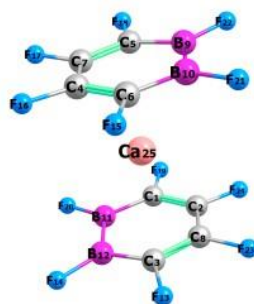

E (B3LYP/6-311++G(d,p)) = -2280.83266113

|                                              |                             |
|----------------------------------------------|-----------------------------|
| Zero-point correction=                       | 0.092325 (Hartree/Particle) |
| Thermal correction to Energy=                | 0.117276                    |
| Thermal correction to Enthalpy=              | 0.118220                    |
| Thermal correction to Gibbs Free Energy=     | 0.036190                    |
| Sum of electronic and zero-point Energies=   | -2280.740336                |
| Sum of electronic and thermal Energies=      | -2280.715385                |
| Sum of electronic and thermal Enthalpies=    | -2280.714441                |
| Sum of electronic and thermal Free Energies= | -2280.796471                |

Charge = -2 Multiplicity = 1

|   |             |             |             |
|---|-------------|-------------|-------------|
| C | 2.37166000  | 1.45283300  | 0.00316400  |
| C | 2.34406900  | 0.69644300  | 1.20058900  |
| C | 2.37164900  | -1.45283600 | 0.00316300  |
| C | -2.34406700 | -0.69644600 | -1.20058700 |
| C | -2.37165900 | 1.45283400  | -0.00316400 |
| C | -2.37164800 | -1.45283600 | -0.00316200 |
| C | -2.34407200 | 0.69644300  | -1.20058800 |
| C | 2.34406400  | -0.69644600 | 1.20058800  |
| B | -2.45675800 | 0.82747000  | 1.36561200  |
| B | -2.45675200 | -0.82747100 | 1.36561300  |
| B | 2.45676300  | 0.82747000  | -1.36561100 |
| B | 2.45675700  | -0.82747200 | -1.36561200 |
| F | 2.39814400  | -2.83124300 | 0.21731500  |
| F | 2.53128600  | -1.66464200 | -2.48773500 |
| F | -2.39814700 | -2.83124300 | -0.21731300 |
| F | -2.38838300 | -1.33859700 | -2.41113400 |
| F | -2.38839300 | 1.33859300  | -2.41113500 |
| F | -2.39816800 | 2.83124100  | -0.21731700 |
| F | 2.39816500  | 2.83124100  | 0.21731800  |
| F | 2.53129700  | 1.66464200  | -2.48773400 |

|    |             |             |             |
|----|-------------|-------------|-------------|
| F  | -2.53128200 | -1.66464100 | 2.48773600  |
| F  | -2.53129300 | 1.66464100  | 2.48773400  |
| F  | 2.38838000  | -1.33859800 | 2.41113400  |
| F  | 2.38839000  | 1.33859300  | 2.41113500  |
| Ca | 0.00000100  | 0.00001000  | -0.00000300 |

[Ca(B<sub>2</sub>C<sub>4</sub>F<sub>6</sub>)<sub>2</sub>]<sup>2-</sup>-p-1

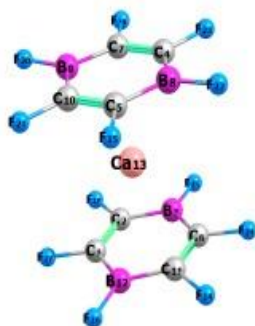

E (B3LYP/6-311++G(d,p)) = -2280.89017437

|                                              |                             |
|----------------------------------------------|-----------------------------|
| Zero-point correction=                       | 0.092782 (Hartree/Particle) |
| Thermal correction to Energy=                | 0.117526                    |
| Thermal correction to Enthalpy=              | 0.118470                    |
| Thermal correction to Gibbs Free Energy=     | 0.036177                    |
| Sum of electronic and zero-point Energies=   | -2280.797392                |
| Sum of electronic and thermal Energies=      | -2280.772648                |
| Sum of electronic and thermal Enthalpies=    | -2280.771704                |
| Sum of electronic and thermal Free Energies= | -2280.853998                |

Charge = -2 Multiplicity = 1

|    |             |             |             |
|----|-------------|-------------|-------------|
| C  | -2.37533300 | -0.39749000 | -1.39136700 |
| C  | -2.37535800 | -1.39182900 | -0.39587500 |
| B  | -2.40982700 | -1.07770200 | 1.07896400  |
| C  | 2.37537200  | -0.39593500 | 1.39180600  |
| C  | 2.37533500  | 1.39138600  | -0.39743100 |
| C  | -2.37535600 | 0.39749200  | 1.39136300  |
| C  | 2.37535400  | -1.39138200 | 0.39742200  |
| B  | 2.40981900  | 1.07891900  | 1.07775000  |
| B  | 2.40980500  | -1.07891600 | -1.07775800 |
| C  | 2.37534100  | 0.39593800  | -1.39181300 |
| C  | -2.37535400 | 1.39182800  | 0.39586800  |
| B  | -2.40979700 | 1.07770500  | -1.07897100 |
| Ca | 0.00000000  | -0.00001000 | 0.00002800  |
| F  | -2.39916800 | 2.70889500  | 0.83886600  |
| F  | 2.39914600  | 2.70796600  | -0.84188000 |

|   |             |             |             |
|---|-------------|-------------|-------------|
| F | -2.46723100 | 2.06057400  | -2.06297500 |
| F | -2.39914500 | -0.84200200 | -2.70792600 |
| F | -2.39917300 | -2.70889600 | -0.83887200 |
| F | 2.39918400  | -2.70796200 | 0.84187300  |
| F | 2.46724600  | -2.06287400 | -2.06067300 |
| F | 2.39914300  | 0.83899600  | -2.70886000 |
| F | 2.46726500  | 2.06287900  | 2.06066600  |
| F | 2.39919900  | -0.83899400 | 2.70885200  |
| F | -2.39918500 | 0.84200400  | 2.70792200  |
| F | -2.46727900 | -2.06057400 | 2.06297000  |

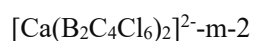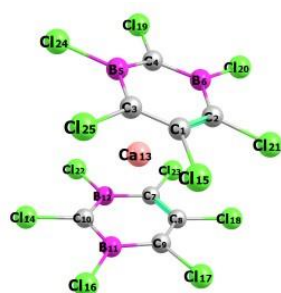

E (B3LYP/6-311++G(d,p)) = -6605.22192607

|                                              |                             |
|----------------------------------------------|-----------------------------|
| Zero-point correction=                       | 0.077896 (Hartree/Particle) |
| Thermal correction to Energy=                | 0.106902                    |
| Thermal correction to Enthalpy=              | 0.107846                    |
| Thermal correction to Gibbs Free Energy=     | 0.012174                    |
| Sum of electronic and zero-point Energies=   | -6605.144030                |
| Sum of electronic and thermal Energies=      | -6605.115024                |
| Sum of electronic and thermal Enthalpies=    | -6605.114080                |
| Sum of electronic and thermal Free Energies= | -6605.209752                |

Charge = -2 Multiplicity = 1

|   |             |             |             |
|---|-------------|-------------|-------------|
| C | -2.12463600 | 0.97927400  | -1.08666400 |
| C | -2.10532200 | -0.40259400 | -1.36539400 |
| C | -2.28592100 | 1.47045600  | 0.22659100  |
| C | -2.47333600 | -0.92541600 | 1.11806000  |
| B | -2.55387400 | 0.54209800  | 1.39853800  |
| B | -2.36051700 | -1.43918600 | -0.28349100 |
| C | 2.28332400  | -1.47386800 | 0.20410500  |
| C | 2.12176500  | -0.96403000 | -1.10187700 |
| C | 2.10487300  | 0.42166000  | -1.36120100 |
| C | 2.47654200  | 0.90889100  | 1.12885200  |
| B | 2.36331200  | 1.44249300  | -0.26525200 |

|    |             |             |             |
|----|-------------|-------------|-------------|
| B  | 2.55435600  | -0.56260200 | 1.38863000  |
| Ca | 0.00031000  | 0.00046200  | 0.33755800  |
| Cl | 2.67775600  | 2.05623400  | 2.49749300  |
| Cl | -1.88570500 | 2.12746400  | -2.40957900 |
| Cl | 2.39907700  | 3.22190100  | -0.65408900 |
| Cl | 1.87248600  | 0.97113900  | -3.03439300 |
| Cl | 1.87974300  | -2.09295500 | -2.44059700 |
| Cl | -2.67111900 | -2.09221900 | 2.47066000  |
| Cl | -2.39401200 | -3.21289700 | -0.69734800 |
| Cl | -1.87408100 | -0.92808600 | -3.04637600 |
| Cl | 2.81215200  | -1.26684600 | 3.05234800  |
| Cl | 2.26742300  | -3.23768800 | 0.43832900  |
| Cl | -2.81114900 | 1.22245500  | 3.07224100  |
| Cl | -2.27294200 | 3.23093900  | 0.48554000  |

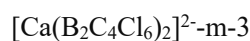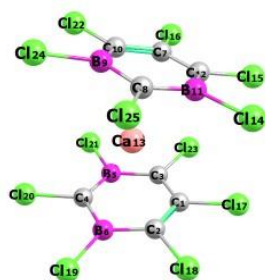

E (B3LYP/6-311++G(d,p)) = -6605.22192586

|                                              |                             |
|----------------------------------------------|-----------------------------|
| Zero-point correction=                       | 0.077893 (Hartree/Particle) |
| Thermal correction to Energy=                | 0.106901                    |
| Thermal correction to Enthalpy=              | 0.107845                    |
| Thermal correction to Gibbs Free Energy=     | 0.012064                    |
| Sum of electronic and zero-point Energies=   | -6605.144033                |
| Sum of electronic and thermal Energies=      | -6605.115025                |
| Sum of electronic and thermal Enthalpies=    | -6605.114081                |
| Sum of electronic and thermal Free Energies= | -6605.209862                |

Charge = -2 Multiplicity = 1

|   |             |             |             |
|---|-------------|-------------|-------------|
| C | 2.12395000  | 0.97244500  | -1.09277600 |
| C | 2.28539100  | 1.47119000  | 0.21755100  |
| C | 2.10517900  | -0.41101400 | -1.36359600 |
| C | 2.47428200  | -0.91945000 | 1.12266600  |
| B | 2.36124700  | -1.44128700 | -0.27588700 |
| B | 2.55415900  | 0.54968200  | 1.39469100  |
| C | -2.12334300 | -0.96958600 | -1.09583200 |

|    |             |             |             |
|----|-------------|-------------|-------------|
| C  | -2.47498200 | 0.91635700  | 1.12433400  |
| B  | -2.55452000 | -0.55348300 | 1.39253000  |
| C  | -2.28505400 | -1.47181100 | 0.21309200  |
| B  | -2.36157700 | 1.44191200  | -0.27279400 |
| C  | -2.10481800 | 0.41455700  | -1.36302900 |
| Ca | -0.00007500 | 0.00002200  | 0.33750500  |
| Cl | -2.39556600 | 3.21905800  | -0.67178800 |
| Cl | -1.87256200 | 0.95422800  | -3.03941900 |
| Cl | -1.88315100 | -2.10642900 | -2.42821300 |
| Cl | 1.88431800  | 2.11285700  | -2.42223200 |
| Cl | 2.27182900  | 3.23307600  | 0.46647300  |
| Cl | 2.81172100  | 1.23972800  | 3.06436800  |
| Cl | 2.67298100  | -2.07840400 | 2.48187900  |
| Cl | 2.39506000  | -3.21737200 | -0.67955600 |
| Cl | -2.27112500 | -3.23431200 | 0.45742200  |
| Cl | 1.87350900  | -0.94623100 | -3.04147700 |
| Cl | -2.81252300 | -1.24793200 | 3.06032700  |
| Cl | -2.67441400 | 2.07169100  | 2.48649700  |

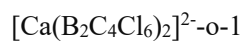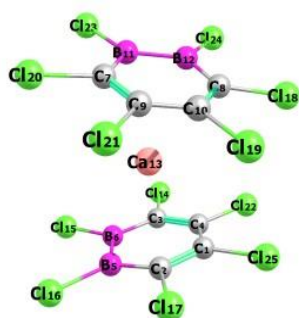

E (B3LYP/6-311++G(d,p)) = -6605.15722180

|                                              |                             |
|----------------------------------------------|-----------------------------|
| Zero-point correction=                       | 0.077203 (Hartree/Particle) |
| Thermal correction to Energy=                | 0.106381                    |
| Thermal correction to Enthalpy=              | 0.107325                    |
| Thermal correction to Gibbs Free Energy=     | 0.011339                    |
| Sum of electronic and zero-point Energies=   | -6605.080019                |
| Sum of electronic and thermal Energies=      | -6605.050841                |
| Sum of electronic and thermal Enthalpies=    | -6605.049897                |
| Sum of electronic and thermal Free Energies= | -6605.145883                |

Charge = -2 Multiplicity = 1

|   |            |             |             |
|---|------------|-------------|-------------|
| C | 2.02627600 | -0.39641300 | -1.36476400 |
| C | 2.19511200 | 0.96425500  | -0.97171700 |

|    |             |             |             |
|----|-------------|-------------|-------------|
| C  | 2.37909300  | -1.22927800 | 0.94383900  |
| C  | 2.10925000  | -1.45536500 | -0.43935100 |
| B  | 2.54426300  | 1.35872700  | 0.42998100  |
| B  | 2.64996900  | 0.13409200  | 1.49862600  |
| C  | -2.38479500 | 1.20807100  | 0.96729000  |
| C  | -2.18924800 | -0.94427600 | -0.99341900 |
| C  | -2.11474800 | 1.46402500  | -0.41083100 |
| C  | -2.02598300 | 0.42496800  | -1.35790700 |
| B  | -2.64984400 | -0.16768200 | 1.49337900  |
| B  | -2.53782900 | -1.36931700 | 0.39950200  |
| Ca | 0.00048400  | 0.00153000  | 0.39486000  |
| Cl | 2.42426600  | -2.66813000 | 2.00817700  |
| Cl | 2.98970900  | 0.36225100  | 3.28843900  |
| Cl | 2.75964100  | 3.12462300  | 0.87642800  |
| Cl | 2.02682000  | 2.20405800  | -2.24691100 |
| Cl | -2.01550100 | -2.15638000 | -2.29407400 |
| Cl | -1.72056100 | 0.84950500  | -3.04298400 |
| Cl | -2.43738900 | 2.62444900  | 2.06127100  |
| Cl | -1.88637900 | 3.12657000  | -0.96160500 |
| Cl | 1.87439900  | -3.10489700 | -1.02483800 |
| Cl | -2.99031600 | -0.43435600 | 3.27767800  |
| Cl | -2.74691600 | -3.14478800 | 0.80866500  |
| Cl | 1.72150800  | -0.78441200 | -3.05868500 |

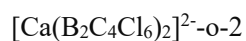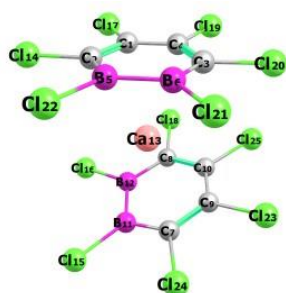

E (B3LYP/6-311++G(d,p)) = -6605.15722236

|                                              |                             |
|----------------------------------------------|-----------------------------|
| Zero-point correction=                       | 0.077203 (Hartree/Particle) |
| Thermal correction to Energy=                | 0.106381                    |
| Thermal correction to Enthalpy=              | 0.107325                    |
| Thermal correction to Gibbs Free Energy=     | 0.011331                    |
| Sum of electronic and zero-point Energies=   | -6605.080019                |
| Sum of electronic and thermal Energies=      | -6605.050841                |
| Sum of electronic and thermal Enthalpies=    | -6605.049897                |
| Sum of electronic and thermal Free Energies= | -6605.145891                |



Charge = -2 Multiplicity = 1

|    |             |             |             |
|----|-------------|-------------|-------------|
| C  | 2.11214300  | 1.45847000  | -0.42758100 |
| C  | 2.38209800  | 1.21963300  | 0.95350900  |
| C  | 2.19216600  | -0.95650900 | -0.98121900 |
| C  | 2.02620100  | 0.40792800  | -1.36218300 |
| B  | 2.65005700  | -0.14915500 | 1.49617800  |
| B  | 2.54106100  | -1.36408200 | 0.41681800  |
| C  | -2.38216900 | -1.21791900 | 0.95614900  |
| C  | -2.19210100 | 0.95484500  | -0.98238100 |
| C  | -2.11267500 | -1.45920700 | -0.42459800 |
| C  | -2.02667800 | -0.41029700 | -1.36103400 |
| B  | -2.64946000 | 0.15189300  | 1.49654900  |
| B  | -2.54042400 | 1.36493200  | 0.41505800  |
| Ca | 0.00008400  | 0.00001400  | 0.39473100  |
| Cl | 2.43102900  | 2.64901300  | 2.03046800  |
| Cl | -2.98901900 | 0.39967600  | 3.28375900  |
| Cl | -2.75181400 | 3.13586500  | 0.84270100  |
| Cl | 1.88060800  | 3.11370400  | -0.99838700 |
| Cl | -2.02090600 | 2.18061000  | -2.27059600 |
| Cl | 1.72124300  | 0.81160700  | -3.05243900 |
| Cl | 2.02091100  | -2.18454000 | -2.26726500 |
| Cl | 2.75314300  | -3.13421000 | 0.84746800  |
| Cl | 2.99030000  | -0.39375800 | 3.28370400  |
| Cl | -1.88193400 | -3.11551500 | -0.99263200 |
| Cl | -2.43134800 | -2.64544800 | 2.03556500  |
| Cl | -1.72231600 | -0.81699500 | -3.05067500 |

[Ca(B<sub>2</sub>C<sub>4</sub>Cl<sub>6</sub>)<sub>2</sub>]<sup>2-</sup>-p-1

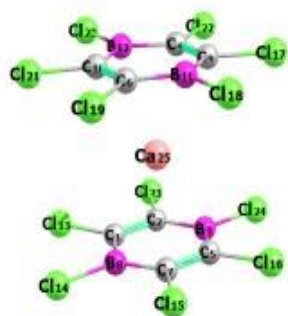

E (B3LYP/6-311++G(d,p)) = -6605.21583902

|                                 |                             |
|---------------------------------|-----------------------------|
| Zero-point correction=          | 0.077612 (Hartree/Particle) |
| Thermal correction to Energy=   | 0.106704                    |
| Thermal correction to Enthalpy= | 0.107648                    |

|                                              |              |
|----------------------------------------------|--------------|
| Thermal correction to Gibbs Free Energy=     | 0.010188     |
| Sum of electronic and zero-point Energies=   | -6605.138227 |
| Sum of electronic and thermal Energies=      | -6605.109136 |
| Sum of electronic and thermal Enthalpies=    | -6605.108191 |
| Sum of electronic and thermal Free Energies= | -6605.205651 |

Charge = -2 Multiplicity = 1

|    |             |             |             |
|----|-------------|-------------|-------------|
| C  | 2.33684500  | 1.40842000  | 0.38832400  |
| C  | 2.33685900  | 0.42474900  | 1.39785300  |
| B  | 2.37679200  | -1.04685100 | 1.07435200  |
| C  | -2.33683200 | -0.38835600 | 1.40843400  |
| C  | 2.33684200  | -1.40842000 | -0.38836000 |
| C  | -2.33685600 | 0.38835700  | -1.40839800 |
| C  | 2.33683500  | -0.42474900 | -1.39788900 |
| B  | 2.37677000  | 1.04685100  | -1.07438800 |
| C  | -2.33684600 | -1.39787500 | 0.42475300  |
| C  | -2.33684900 | 1.39787600  | -0.42471700 |
| B  | -2.37679200 | -1.07435900 | -1.04684400 |
| B  | -2.37677000 | 1.07436000  | 1.04688000  |
| Cl | 2.29777200  | 3.12871900  | 0.84736800  |
| Cl | 2.38737500  | 2.31935900  | -2.38034600 |
| Cl | 2.29776000  | -0.92826600 | -3.10570100 |
| Cl | 2.29776800  | -3.12871900 | -0.84740200 |
| Cl | -2.29778400 | -3.10569300 | 0.92825100  |
| Cl | -2.38743200 | -2.38030400 | -2.31936500 |
| Cl | -2.29779800 | 0.84741700  | -3.12869300 |
| Cl | -2.38737500 | 2.38030500  | 2.31940100  |
| Cl | -2.29778900 | 3.10569300  | -0.92821700 |
| Cl | -2.29774200 | -0.84741700 | 3.12872800  |
| Cl | 2.29781400  | 0.92826600  | 3.10566600  |
| Cl | 2.38743100  | -2.31935900 | 2.38031000  |
| Ca | 0.00000000  | -0.00000200 | 0.00000000  |
